# Supplementary material
Source: MDPI journal article supplement (https://www.mdpi.com/2571-8789/2/4/64)
Supplement: s1 [file s1]

R.J.B Flat-earth paper (2017- 11th November 2018). Supplementary file 1 of terrain data plus SOM  
Below is raw data file from Nunn & Puga (2010/2012) - <https://diegopuga.org/data/rugged/>. Below

| isocode | isonum | country         | rugged [Ter | rugged_popw | rugged_slope [% |
|---------|--------|-----------------|-------------|-------------|-----------------|
| ABW     | 533    | Aruba           | 0.462       | 0.38        | 1.226           |
| AFG     | 4      | Afghanistan     | 2.518       | 1.469       | 7.414           |
| AGO     | 24     | Angola          | 0.858       | 0.714       | 2.274           |
| AIA     | 660    | Anguilla        | 0.013       | 0.01        | 0.026           |
| ALB     | 8      | Albania         | 3.427       | 1.597       | 10.451          |
| AND     | 20     | Andorra         | 5.717       | 6.722       | 17.774          |
| ANT     | 530    | Netherlands Ar  | 0.255       | 0.039       | 0.68            |
| ARE     | 784    | United Arab En  | 0.769       | 0.316       | 2.112           |
| ARG     | 32     | Argentina       | 0.775       | 0.22        | 2.268           |
| ARM     | 51     | Armenia         | 2.688       | 0.934       | 8.178           |
| ASM     | 16     | American Samc   | 2.647       | 1.63        | 7.032           |
| ATG     | 28     | Antigua and Ba  | 0.006       | 0.003       | 0.012           |
| AUS     | 36     | Australia       | 0.143       | 0.183       | 0.405           |
| AUT     | 40     | Austria         | 3.513       | 1.152       | 11.095          |
| AZE     | 31     | Azerbaijan      | 1.672       | 0.534       | 5.08            |
| BDI     | 108    | Burundi         | 1.78        | 1.586       | 4.721           |
| BEL     | 56     | Belgium         | 0.388       | 0.261       | 1.239           |
| BEN     | 204    | Benin           | 0.141       | 0.099       | 0.377           |
| BFA     | 854    | Burkina Faso    | 0.236       | 0.214       | 0.638           |
| BGD     | 50     | Bangladesh      | 0.186       | 0.065       | 0.502           |
| BGR     | 100    | Bulgaria        | 1.479       | 0.711       | 4.498           |
| BHR     | 48     | Bahrain         | 0.231       | 0.163       | 0.627           |
| BHS     | 44     | Bahamas         | 0.055       | 0.1         | 0.144           |
| BIH     | 70     | Bosnia and Her  | 2.311       | 1.288       | 7.075           |
| BLR     | 112    | Belarus         | 0.164       | 0.208       | 0.54            |
| BLZ     | 84     | Belize          | 0.607       | 0.226       | 1.616           |
| BMU     | 60     | Bermuda         | 0.015       | 0.014       | 0.03            |
| BOL     | 68     | Bolivia         | 0.853       | 0.911       | 2.343           |
| BRA     | 76     | Brazil          | 0.24        | 0.25        | 0.654           |
| BRB     | 52     | Barbados        | 0.963       | 0.695       | 2.581           |
| BRN     | 96     | Brunei Darussa  | 0.52        | 0.134       | 1.366           |
| BTN     | 64     | Bhutan          | 6.74        | 4.913       | 19.325          |
| BWA     | 72     | Botswana        | 0.181       | 0.478       | 0.488           |
| CAF     | 140    | Central African | 0.197       | 0.257       | 0.528           |
| CAN     | 124    | Canada          | 0.775       | 0.37        | 2.695           |
| CCK     | 166    | Cocos (Keeling) | 0.015       | 0.018       | 0.031           |
| CHE     | 756    | Switzerland     | 4.761       | 1.45        | 14.999          |
| CHL     | 152    | Chile           | 2.481       | 0.677       | 7.365           |
| CHN     | 156    | China           | 1.878       | 0.708       | 5.493           |
| CIV     | 384    | Côte d'Ivoire   | 0.224       | 0.159       | 0.594           |
| CMR     | 120    | Cameroon        | 0.515       | 0.545       | 1.374           |
| COD     | 180    | Democratic Rej  | 0.443       | 0.531       | 1.177           |
| COG     | 178    | Congo           | 0.152       | 0.411       | 0.406           |
| COK     | 184    | Cook Islands    | 0.96        | 0.594       | 2.641           |
| COL     | 170    | Colombia        | 0.885       | 0.89        | 2.376           |
| COM     | 174    | Comoros         | 3.328       | 2.172       | 9.049           |
| CPV     | 132    | Cape Verde      | 2.367       | 1.399       | 6.502           |

|     |                      |       |       |        |
|-----|----------------------|-------|-------|--------|
| CRI | 188 Costa Rica       | 2.112 | 1.044 | 5.708  |
| CUB | 192 Cuba             | 0.528 | 0.293 | 1.448  |
| CXR | 162 Christmas Islan  | 1.321 | 1.422 | 3.477  |
| CYM | 136 Cayman Islands   | 0.096 | 0.085 | 0.237  |
| CYP | 196 Cyprus           | 2.718 | 0.909 | 7.867  |
| CZE | 203 Czech Republic   | 0.884 | 0.578 | 2.845  |
| DEU | 276 Germany          | 0.597 | 0.405 | 1.906  |
| DJI | 262 Djibouti         | 2.432 | 0.804 | 6.416  |
| DMA | 212 Dominica         | 0.003 | 0.008 | 0.005  |
| DNK | 208 Denmark          | 0.189 | 0.191 | 0.611  |
| DOM | 214 Dominican Rep    | 1.641 | 0.519 | 4.495  |
| DZA | 12 Algeria           | 0.51  | 1.368 | 1.445  |
| ECU | 218 Ecuador          | 1.278 | 0.766 | 3.446  |
| EGY | 818 Egypt            | 0.723 | 0.274 | 2.001  |
| ERI | 232 Eritrea          | 2.481 | 1.911 | 6.663  |
| ESH | 732 Western Sahara   | 0.203 | 0.301 | 0.565  |
| ESP | 724 Spain            | 1.689 | 0.81  | 5.062  |
| EST | 233 Estonia          | 0.123 | 0.188 | 0.414  |
| ETH | 231 Ethiopia         | 1.57  | 1.725 | 4.193  |
| FIN | 246 Finland          | 0.328 | 0.268 | 1.202  |
| FJI | 242 Fiji             | 1.396 | 0.582 | 3.723  |
| FLK | 238 Falkland Islands | 0.264 | 0.214 | 0.859  |
| FRA | 250 France           | 1.098 | 0.496 | 3.406  |
| FRO | 234 Faeroe Islands   | 2.253 | 1.309 | 8.215  |
| FSM | 583 Micronesia, Fed  | 1.353 | 0.919 | 3.61   |
| GAB | 266 Gabon            | 0.218 | 0.582 | 0.583  |
| GBR | 826 United Kingdom   | 0.568 | 0.21  | 1.878  |
| GEO | 268 Georgia          | 3.659 | 0.859 | 11.258 |
| GHA | 288 Ghana            | 0.228 | 0.25  | 0.601  |
| GIB | 292 Gibraltar        | 7.811 | 5.542 | 21.453 |
| GIN | 324 Guinea           | 0.74  | 1.03  | 1.969  |
| GLP | 312 Guadeloupe       | 1.188 | 0.533 | 3.23   |
| GMB | 270 Gambia           | 0.353 | 0.384 | 0.915  |
| GNB | 624 Guinea-Bissau    | 0.491 | 0.534 | 1.302  |
| GNQ | 226 Equatorial Guir  | 0.559 | 1.405 | 1.449  |
| GRC | 300 Greece           | 3.103 | 1.295 | 9.166  |
| GRD | 308 Grenada          | 2.088 | 1.538 | 5.655  |
| GRL | 304 Greenland        | 0.41  | 0.914 | 1.548  |
| GTM | 320 Guatemala        | 1.807 | 1.369 | 4.893  |
| GUF | 254 French Guiana    | 0.205 | 0.254 | 0.546  |
| GUM | 316 Guam             | 0.666 | 0.293 | 1.825  |
| GUY | 328 Guyana           | 0.273 | 0.052 | 0.744  |
| HKG | 344 Hong Kong Spe    | 2.501 | 1.558 | 6.692  |
| HND | 340 Honduras         | 2.15  | 1.207 | 5.824  |
| HRV | 191 Croatia          | 1.267 | 0.678 | 3.842  |
| HTI | 332 Haiti            | 2.362 | 1.318 | 6.448  |
| HUN | 348 Hungary          | 0.346 | 0.289 | 1.09   |
| IDN | 360 Indonesia        | 0.967 | 0.435 | 2.587  |
| IND | 356 India            | 1.013 | 0.237 | 2.842  |
| IOT | 86 British Indian O  | 0.018 | 0.016 | 0.037  |

|     |                       |       |       |        |
|-----|-----------------------|-------|-------|--------|
| IRL | 372 Ireland           | 0.513 | 0.28  | 1.676  |
| IRN | 364 Iran, Islamic Re  | 2.445 | 0.929 | 6.962  |
| IRQ | 368 Iraq              | 0.67  | 0.36  | 1.919  |
| ISL | 352 Iceland           | 1.472 | 0.557 | 5.318  |
| ISR | 376 Israel            | 1.705 | 1.002 | 4.808  |
| ITA | 380 Italy             | 2.458 | 0.755 | 7.506  |
| JAM | 388 Jamaica           | 1.788 | 0.934 | 4.837  |
| JOR | 400 Jordan            | 1.097 | 1.648 | 3.115  |
| JPN | 392 Japan             | 2.132 | 0.463 | 6.275  |
| KAZ | 398 Kazakhstan        | 0.372 | 0.281 | 1.172  |
| KEN | 404 Kenya             | 0.669 | 0.559 | 1.781  |
| KGZ | 417 Kyrgyzstan        | 4.287 | 0.948 | 13.105 |
| KHM | 116 Cambodia          | 0.54  | 0.146 | 1.421  |
| KIR | 296 Kiribati          | 0.01  | 0.015 | 0.021  |
| KNA | 659 Saint Kitts and N | 0.006 | 0.01  | 0.012  |
| KOR | 410 Republic of Kor   | 1.96  | 0.747 | 5.807  |
| KWT | 414 Kuwait            | 0.245 | 0.271 | 0.691  |
| LAO | 418 Lao People's De   | 2.553 | 1.218 | 6.976  |
| LBN | 422 Lebanon           | 4.197 | 2.17  | 12.042 |
| LBR | 430 Liberia           | 0.263 | 0.259 | 0.695  |
| LBY | 434 Libyan Arab Jar   | 0.403 | 0.337 | 1.124  |
| LCA | 662 Saint Lucia       | 2.147 | 1.351 | 5.841  |
| LIE | 438 Liechtenstein     | 5.328 | 2.927 | 17.18  |
| LKA | 144 Sri Lanka         | 0.65  | 0.446 | 1.712  |
| LSO | 426 Lesotho           | 6.202 | 4.165 | 17.595 |
| LTU | 440 Lithuania         | 0.175 | 0.229 | 0.578  |
| LUX | 442 Luxembourg        | 0.881 | 0.581 | 2.844  |
| LVA | 428 Latvia            | 0.154 | 0.136 | 0.522  |
| MAC | 446 Macao Special .   | 0.732 | 0.527 | 1.921  |
| MAR | 504 Morocco           | 2.413 | 1.291 | 6.853  |
| MCO | 492 Monaco            | 6.612 | 6.043 | 20.834 |
| MDA | 498 Republic of Mo    | 0.799 | 0.573 | 2.527  |
| MDG | 450 Madagascar        | 1.169 | 0.738 | 3.185  |
| MDV | 462 Maldives          | 0.012 | 0.012 | 0.024  |
| MEX | 484 Mexico            | 1.732 | 0.825 | 4.795  |
| MHL | 584 Marshall Island   | 0.014 | 0.016 | 0.033  |
| MKD | 807 The former Yug    | 2.665 | 0.885 | 8.19   |
| MLI | 466 Mali              | 0.147 | 0.305 | 0.393  |
| MLT | 470 Malta             | 1.527 | 1.171 | 4.292  |
| MMR | 104 Myanmar           | 1.988 | 0.332 | 5.517  |
| MNG | 496 Mongolia          | 1.057 | 0.765 | 3.352  |
| MNP | 580 Northern Maria    | 1.7   | 1.484 | 4.572  |
| MOZ | 508 Mozambique        | 0.612 | 0.438 | 1.653  |
| MRT | 478 Mauritania        | 0.115 | 0.147 | 0.308  |
| MSR | 500 Montserrat        | 3.395 | 2.824 | 9.256  |
| MTQ | 474 Martinique        | 1.206 | 0.659 | 3.311  |
| MUS | 480 Mauritius         | 0.949 | 0.788 | 2.436  |
| MWI | 454 Malawi            | 1.027 | 0.821 | 2.759  |
| MYS | 458 Malaysia          | 1.009 | 0.374 | 2.684  |
| MYT | 175 Mayotte           | 2.673 | 2.483 | 5.809  |

|     |                      |       |       |        |
|-----|----------------------|-------|-------|--------|
| NAM | 516 Namibia          | 0.913 | 0.423 | 2.489  |
| NCL | 540 New Caledonia    | 1.586 | 0.621 | 4.338  |
| NER | 562 Niger            | 0.178 | 0.222 | 0.481  |
| NFK | 574 Norfolk Island   | 1.154 | 0.812 | 3.266  |
| NGA | 566 Nigeria          | 0.312 | 0.229 | 0.833  |
| NIC | 558 Nicaragua        | 0.992 | 0.768 | 2.671  |
| NIU | 570 Niue             | 0.177 | 0.205 | 0.472  |
| NLD | 528 Netherlands      | 0.037 | 0.042 | 0.108  |
| NOR | 578 Norway           | 2.409 | 1.245 | 8.516  |
| NPL | 524 Nepal            | 5.043 | 1.26  | 14.458 |
| NRU | 520 Nauru            | 0.311 | 0.527 | 0.781  |
| NZL | 554 New Zealand      | 2.038 | 0.451 | 6.233  |
| OMN | 512 Oman             | 1.109 | 0.896 | 3.012  |
| PAK | 586 Pakistan         | 1.949 | 0.341 | 5.665  |
| PAN | 591 Panama           | 1.54  | 0.546 | 4.128  |
| PCN | 612 Pitcairn         | 0.404 | 0.79  | 1.067  |
| PER | 604 Peru             | 1.347 | 0.991 | 3.653  |
| PHL | 608 Philippines      | 2.028 | 0.574 | 5.428  |
| PLW | 585 Palau            | 0.475 | 0.38  | 1.293  |
| PNG | 598 Papua New Gui    | 1.589 | 0.98  | 4.217  |
| POL | 616 Poland           | 0.297 | 0.259 | 0.951  |
| PRI | 630 Puerto Rico      | 1.447 | 0.699 | 3.928  |
| PRK | 408 Democratic Pec   | 2.521 | 0.884 | 7.681  |
| PRT | 620 Portugal         | 1.304 | 0.967 | 3.937  |
| PRY | 600 Paraguay         | 0.245 | 0.479 | 0.681  |
| PSE | 275 Occupied Pales   | 2.775 | 1.754 | 7.927  |
| PYF | 258 French Polynes   | 2.072 | 1.389 | 5.637  |
| QAT | 634 Qatar            | 0.181 | 0.156 | 0.493  |
| REU | 638 Réunion          | 3.873 | 0.962 | 10.657 |
| ROU | 642 Romania          | 1.267 | 0.555 | 4.005  |
| RUS | 643 Russian Federa   | 0.94  | 0.355 | 3.278  |
| RWA | 646 Rwanda           | 3.309 | 3.178 | 8.748  |
| SAU | 682 Saudi Arabia     | 0.914 | 0.688 | 2.514  |
| SCG | 891 Serbia and Mor   | 1.673 | 0.711 | 5.144  |
| SDN | 736 Sudan            | 0.442 | 0.292 | 1.186  |
| SEN | 686 Senegal          | 0.244 | 0.246 | 0.647  |
| SGP | 702 Singapore        | 0.016 | 0.004 | 0.036  |
| SHN | 654 Saint Helena     | 3.863 | 2.368 | 11.182 |
| SJM | 744 Svalbard and Ja  | 1.623 | 1.278 | 6.575  |
| SLB | 90 Solomon Island    | 1.54  | 1.109 | 4.111  |
| SLE | 694 Sierra Leone     | 0.498 | 0.574 | 1.317  |
| SLV | 222 El Salvador      | 1.75  | 1     | 4.746  |
| SMR | 674 San Marino       | 1.802 | 1.925 | 5.497  |
| SOM | 706 Somalia          | 0.65  | 0.45  | 1.711  |
| SPM | 666 Saint Pierre anc | 0.833 | 1.054 | 2.467  |
| STP | 678 Sao Tome and I   | 2.347 | 0.876 | 5.991  |
| SUR | 740 Suriname         | 0.307 | 0.034 | 0.815  |
| SVK | 703 Slovakia         | 1.56  | 0.672 | 5.043  |
| SVN | 705 Slovenia         | 2.496 | 0.746 | 7.713  |
| SWE | 752 Sweden           | 0.715 | 0.343 | 2.53   |

|     |     |                   |       |       |        |
|-----|-----|-------------------|-------|-------|--------|
| SWZ | 748 | Swaziland         | 3.063 | 2.301 | 8.574  |
| SYC | 690 | Seychelles        | 4.885 | 1.802 | 11.129 |
| SYR | 760 | Syrian Arab Rep   | 0.756 | 0.741 | 2.174  |
| TCA | 796 | Turks and Caicc   | 0.007 | 0.01  | 0.013  |
| TCD | 148 | Chad              | 0.419 | 0.197 | 1.135  |
| TGO | 768 | Togo              | 0.28  | 0.247 | 0.745  |
| THA | 764 | Thailand          | 1.051 | 0.189 | 2.826  |
| TJK | 762 | Tajikistan        | 5.301 | 1.033 | 15.976 |
| TKL | 772 | Tokelau           | 0     | 0     | 0      |
| TKM | 795 | Turkmenistan      | 0.284 | 0.248 | 0.834  |
| TLS | 626 | Timor-Leste       | 1.85  | 1.286 | 5.001  |
| TON | 776 | Tonga             | 0.773 | 0.07  | 1.992  |
| TTO | 780 | Trinidad and Tc   | 0.603 | 0.521 | 1.611  |
| TUN | 788 | Tunisia           | 0.726 | 0.585 | 2.079  |
| TUR | 792 | Turkey            | 2.62  | 1.192 | 7.773  |
| TUV | 798 | Tuvalu            | 0.025 | 0.02  | 0.055  |
| TWN | 158 | Taiwan            | 3.49  | 0.429 | 9.785  |
| TZA | 834 | United Republi    | 0.677 | 0.541 | 1.814  |
| UGA | 800 | Uganda            | 0.913 | 0.779 | 2.424  |
| UKR | 804 | Ukraine           | 0.416 | 0.359 | 1.317  |
| UMI | 581 | United States N   | 0.005 | 0.035 | 0.011  |
| URY | 858 | Uruguay           | 0.435 | 0.391 | 1.283  |
| USA | 840 | United States o   | 1.073 | 0.333 | 3.384  |
| UZB | 860 | Uzbekistan        | 0.526 | 0.243 | 1.589  |
| VAT | 336 | Holy See          | 0.438 | 0.428 | 1.162  |
| VCT | 670 | Saint Vincent a   | 3.071 | 1.878 | 8.401  |
| VEN | 862 | Venezuela (Boli   | 0.634 | 0.594 | 1.716  |
| VGB | 92  | British Virgin Is | 1.257 | 1.873 | 3.131  |
| VIR | 850 | United States V   | 1.404 | 1.268 | 3.652  |
| VNM | 704 | Viet Nam          | 2.054 | 0.439 | 5.603  |
| VUT | 548 | Vanuatu           | 1.729 | 1.041 | 4.709  |
| WLF | 876 | Wallis and Futu   | 1.306 | 0.977 | 3.505  |
| WSM | 882 | Samoa             | 1.677 | 0.968 | 4.644  |
| YEM | 887 | Yemen             | 2.323 | 2.197 | 6.155  |
| ZAF | 710 | South Africa      | 1.761 | 1.318 | 4.942  |
| ZMB | 894 | Zambia            | 0.533 | 0.506 | 1.422  |
| ZWE | 716 | Zimbabwe          | 1.194 | 1.106 | 3.232  |

|         |              |         |        |             |              |
|---------|--------------|---------|--------|-------------|--------------|
| isocode | isonum       | country | rugged | rugged_popw | rugged_slope |
|         | MEAN OR TOT  |         | 1.38   |             | 3.94         |
|         | SCALE OR TOT |         |        |             | %            |

This is the Terrain Ruggedness Index (TRI) which is a measure of the average slope of a terrain. It is calculated as the average slope of a terrain, where the slope is measured in degrees. The TRI is a measure of the average slope of a terrain, where the slope is measured in degrees. The TRI is a measure of the average slope of a terrain, where the slope is measured in degrees.

This is average slope of a terrain, where the slope is measured in degrees. The TRI is a measure of the average slope of a terrain, where the slope is measured in degrees. The TRI is a measure of the average slope of a terrain, where the slope is measured in degrees.

Note a slope of 4 degrees is a 4 % slope is 0.07 degrees. So, all this would be a 4 % slope is 0.07 degrees. But scale is only 3 degrees.

Japan slope is about 3 degrees. This slope is just 6 degrees.

| isocode | isonum | country          | rugged | rugged_popw | OK rob, multiply : | rugged_slope |
|---------|--------|------------------|--------|-------------|--------------------|--------------|
| ABW     | 533    | Aruba            | 0.462  | 0.38        |                    | 1.226        |
| AFG     | 4      | Afghanistan      | 2.518  | 1.469       |                    | 7.414        |
| AGO     | 24     | Angola           | 0.858  | 0.714       |                    | 2.274        |
| AIA     | 660    | Anguilla         | 0.013  | 0.01        |                    | 0.026        |
| ALB     | 8      | Albania          | 3.427  | 1.597       |                    | 10.451       |
| AND     | 20     | Andorra          | 5.717  | 6.722       |                    | 17.774       |
| ANT     | 530    | Netherlands Ar   | 0.255  | 0.039       |                    | 0.68         |
| ARE     | 784    | United Arab Em   | 0.769  | 0.316       |                    | 2.112        |
| ARG     | 32     | Argentina        | 0.775  | 0.22        |                    | 2.268        |
| ARM     | 51     | Armenia          | 2.688  | 0.934       |                    | 8.178        |
| ASM     | 16     | American Samoa   | 2.647  | 1.63        |                    | 7.032        |
| ATG     | 28     | Antigua and Barb | 0.006  | 0.003       |                    | 0.012        |
| AUS     | 36     | Australia        | 0.143  | 0.183       |                    | 0.405        |
| AUT     | 40     | Austria          | 3.513  | 1.152       |                    | 11.095       |
| AZE     | 31     | Azerbaijan       | 1.672  | 0.534       |                    | 5.08         |
| BDI     | 108    | Burundi          | 1.78   | 1.586       |                    | 4.721        |
| BEL     | 56     | Belgium          | 0.388  | 0.261       |                    | 1.239        |
| BEN     | 204    | Benin            | 0.141  | 0.099       |                    | 0.377        |
| BFA     | 854    | Burkina Faso     | 0.236  | 0.214       |                    | 0.638        |
| BGD     | 50     | Bangladesh       | 0.186  | 0.065       |                    | 0.502        |
| BGR     | 100    | Bulgaria         | 1.479  | 0.711       |                    | 4.498        |
| BHR     | 48     | Bahrain          | 0.231  | 0.163       |                    | 0.627        |
| BHS     | 44     | Bahamas          | 0.055  | 0.1         |                    | 0.144        |
| BIH     | 70     | Bosnia and Herz  | 2.311  | 1.288       |                    | 7.075        |
| BLR     | 112    | Belarus          | 0.164  | 0.208       |                    | 0.54         |
| BLZ     | 84     | Belize           | 0.607  | 0.226       |                    | 1.616        |
| BMU     | 60     | Bermuda          | 0.015  | 0.014       |                    | 0.03         |
| BOL     | 68     | Bolivia          | 0.853  | 0.911       |                    | 2.343        |
| BRA     | 76     | Brazil           | 0.24   | 0.25        |                    | 0.654        |
| BRB     | 52     | Barbados         | 0.963  | 0.695       |                    | 2.581        |
| BRN     | 96     | Brunei Darussa   | 0.52   | 0.134       |                    | 1.366        |
| BTN     | 64     | Bhutan           | 6.74   | 4.913       |                    | 19.325       |
| BWA     | 72     | Botswana         | 0.181  | 0.478       |                    | 0.488        |
| CAF     | 140    | Central African  | 0.197  | 0.257       |                    | 0.528        |
| CAN     | 124    | Canada           | 0.775  | 0.37        |                    | 2.695        |
| CCK     | 166    | Cocos (Keeling)  | 0.015  | 0.018       |                    | 0.031        |
| CHE     | 756    | Switzerland      | 4.761  | 1.45        |                    | 14.999       |
| CHL     | 152    | Chile            | 2.481  | 0.677       |                    | 7.365        |
| CHN     | 156    | China            | 1.878  | 0.708       |                    | 5.493        |
| CIV     | 384    | Côte d'Ivoire    | 0.224  | 0.159       |                    | 0.594        |
| CMR     | 120    | Cameroon         | 0.515  | 0.545       |                    | 1.374        |
| COD     | 180    | Democratic Rep   | 0.443  | 0.531       |                    | 1.177        |
| COG     | 178    | Congo            | 0.152  | 0.411       |                    | 0.406        |
| COK     | 184    | Cook Islands     | 0.96   | 0.594       |                    | 2.641        |
| COL     | 170    | Colombia         | 0.885  | 0.89        |                    | 2.376        |
| COM     | 174    | Comoros          | 3.328  | 2.172       |                    | 9.049        |
| CPV     | 132    | Cape Verde       | 2.367  | 1.399       |                    | 6.502        |
| CRI     | 188    | Costa Rica       | 2.112  | 1.044       |                    | 5.708        |

|     |                      |       |       |        |
|-----|----------------------|-------|-------|--------|
| CUB | 192 Cuba             | 0.528 | 0.293 | 1.448  |
| CXR | 162 Christmas Islan  | 1.321 | 1.422 | 3.477  |
| CYM | 136 Cayman Islands   | 0.096 | 0.085 | 0.237  |
| CYP | 196 Cyprus           | 2.718 | 0.909 | 7.867  |
| CZE | 203 Czech Republic   | 0.884 | 0.578 | 2.845  |
| DEU | 276 Germany          | 0.597 | 0.405 | 1.906  |
| DJI | 262 Djibouti         | 2.432 | 0.804 | 6.416  |
| DMA | 212 Dominica         | 0.003 | 0.008 | 0.005  |
| DNK | 208 Denmark          | 0.189 | 0.191 | 0.611  |
| DOM | 214 Dominican Rep    | 1.641 | 0.519 | 4.495  |
| DZA | 12 Algeria           | 0.51  | 1.368 | 1.445  |
| ECU | 218 Ecuador          | 1.278 | 0.766 | 3.446  |
| EGY | 818 Egypt            | 0.723 | 0.274 | 2.001  |
| ERI | 232 Eritrea          | 2.481 | 1.911 | 6.663  |
| ESH | 732 Western Sahara   | 0.203 | 0.301 | 0.565  |
| ESP | 724 Spain            | 1.689 | 0.81  | 5.062  |
| EST | 233 Estonia          | 0.123 | 0.188 | 0.414  |
| ETH | 231 Ethiopia         | 1.57  | 1.725 | 4.193  |
| FIN | 246 Finland          | 0.328 | 0.268 | 1.202  |
| FJI | 242 Fiji             | 1.396 | 0.582 | 3.723  |
| FLK | 238 Falkland Islands | 0.264 | 0.214 | 0.859  |
| FRA | 250 France           | 1.098 | 0.496 | 3.406  |
| FRO | 234 Faeroe Islands   | 2.253 | 1.309 | 8.215  |
| FSM | 583 Micronesia, Fed  | 1.353 | 0.919 | 3.61   |
| GAB | 266 Gabon            | 0.218 | 0.582 | 0.583  |
| GBR | 826 United Kingdom   | 0.568 | 0.21  | 1.878  |
| GEO | 268 Georgia          | 3.659 | 0.859 | 11.258 |
| GHA | 288 Ghana            | 0.228 | 0.25  | 0.601  |
| GIB | 292 Gibraltar        | 7.811 | 5.542 | 21.453 |
| GIN | 324 Guinea           | 0.74  | 1.03  | 1.969  |
| GLP | 312 Guadeloupe       | 1.188 | 0.533 | 3.23   |
| GMB | 270 Gambia           | 0.353 | 0.384 | 0.915  |
| GNB | 624 Guinea-Bissau    | 0.491 | 0.534 | 1.302  |
| GNQ | 226 Equatorial Guir  | 0.559 | 1.405 | 1.449  |
| GRC | 300 Greece           | 3.103 | 1.295 | 9.166  |
| GRD | 308 Grenada          | 2.088 | 1.538 | 5.655  |
| GRL | 304 Greenland        | 0.41  | 0.914 | 1.548  |
| GTM | 320 Guatemala        | 1.807 | 1.369 | 4.893  |
| GUF | 254 French Guiana    | 0.205 | 0.254 | 0.546  |
| GUM | 316 Guam             | 0.666 | 0.293 | 1.825  |
| GUY | 328 Guyana           | 0.273 | 0.052 | 0.744  |
| HKG | 344 Hong Kong Spe    | 2.501 | 1.558 | 6.692  |
| HND | 340 Honduras         | 2.15  | 1.207 | 5.824  |
| HRV | 191 Croatia          | 1.267 | 0.678 | 3.842  |
| HTI | 332 Haiti            | 2.362 | 1.318 | 6.448  |
| HUN | 348 Hungary          | 0.346 | 0.289 | 1.09   |
| IDN | 360 Indonesia        | 0.967 | 0.435 | 2.587  |
| IND | 356 India            | 1.013 | 0.237 | 2.842  |
| IOT | 86 British Indian O  | 0.018 | 0.016 | 0.037  |
| IRL | 372 Ireland          | 0.513 | 0.28  | 1.676  |

|     |                       |       |       |        |
|-----|-----------------------|-------|-------|--------|
| IRN | 364 Iran, Islamic Re  | 2.445 | 0.929 | 6.962  |
| IRQ | 368 Iraq              | 0.67  | 0.36  | 1.919  |
| ISL | 352 Iceland           | 1.472 | 0.557 | 5.318  |
| ISR | 376 Israel            | 1.705 | 1.002 | 4.808  |
| ITA | 380 Italy             | 2.458 | 0.755 | 7.506  |
| JAM | 388 Jamaica           | 1.788 | 0.934 | 4.837  |
| JOR | 400 Jordan            | 1.097 | 1.648 | 3.115  |
| JPN | 392 Japan             | 2.132 | 0.463 | 6.275  |
| KAZ | 398 Kazakhstan        | 0.372 | 0.281 | 1.172  |
| KEN | 404 Kenya             | 0.669 | 0.559 | 1.781  |
| KGZ | 417 Kyrgyzstan        | 4.287 | 0.948 | 13.105 |
| KHM | 116 Cambodia          | 0.54  | 0.146 | 1.421  |
| KIR | 296 Kiribati          | 0.01  | 0.015 | 0.021  |
| KNA | 659 Saint Kitts and N | 0.006 | 0.01  | 0.012  |
| KOR | 410 Republic of Kor   | 1.96  | 0.747 | 5.807  |
| KWT | 414 Kuwait            | 0.245 | 0.271 | 0.691  |
| LAO | 418 Lao People's De   | 2.553 | 1.218 | 6.976  |
| LBN | 422 Lebanon           | 4.197 | 2.17  | 12.042 |
| LBR | 430 Liberia           | 0.263 | 0.259 | 0.695  |
| LBY | 434 Libyan Arab Jar   | 0.403 | 0.337 | 1.124  |
| LCA | 662 Saint Lucia       | 2.147 | 1.351 | 5.841  |
| LIE | 438 Liechtenstein     | 5.328 | 2.927 | 17.18  |
| LKA | 144 Sri Lanka         | 0.65  | 0.446 | 1.712  |
| LSO | 426 Lesotho           | 6.202 | 4.165 | 17.595 |
| LTU | 440 Lithuania         | 0.175 | 0.229 | 0.578  |
| LUX | 442 Luxembourg        | 0.881 | 0.581 | 2.844  |
| LVA | 428 Latvia            | 0.154 | 0.136 | 0.522  |
| MAC | 446 Macao Special .   | 0.732 | 0.527 | 1.921  |
| MAR | 504 Morocco           | 2.413 | 1.291 | 6.853  |
| MCO | 492 Monaco            | 6.612 | 6.043 | 20.834 |
| MDA | 498 Republic of Mo    | 0.799 | 0.573 | 2.527  |
| MDG | 450 Madagascar        | 1.169 | 0.738 | 3.185  |
| MDV | 462 Maldives          | 0.012 | 0.012 | 0.024  |
| MEX | 484 Mexico            | 1.732 | 0.825 | 4.795  |
| MHL | 584 Marshall Island   | 0.014 | 0.016 | 0.033  |
| MKD | 807 The former Yug    | 2.665 | 0.885 | 8.19   |
| MLI | 466 Mali              | 0.147 | 0.305 | 0.393  |
| MLT | 470 Malta             | 1.527 | 1.171 | 4.292  |
| MMR | 104 Myanmar           | 1.988 | 0.332 | 5.517  |
| MNG | 496 Mongolia          | 1.057 | 0.765 | 3.352  |
| MNP | 580 Northern Mariæ    | 1.7   | 1.484 | 4.572  |
| MOZ | 508 Mozambique        | 0.612 | 0.438 | 1.653  |
| MRT | 478 Mauritania        | 0.115 | 0.147 | 0.308  |
| MSR | 500 Montserrat        | 3.395 | 2.824 | 9.256  |
| MTQ | 474 Martinique        | 1.206 | 0.659 | 3.311  |
| MUS | 480 Mauritius         | 0.949 | 0.788 | 2.436  |
| MWI | 454 Malawi            | 1.027 | 0.821 | 2.759  |
| MYS | 458 Malaysia          | 1.009 | 0.374 | 2.684  |
| MYT | 175 Mayotte           | 2.673 | 2.483 | 5.809  |
| NAM | 516 Namibia           | 0.913 | 0.423 | 2.489  |



|     |                      |       |       |        |
|-----|----------------------|-------|-------|--------|
| NCL | 540 New Caledonia    | 1.586 | 0.621 | 4.338  |
| NER | 562 Niger            | 0.178 | 0.222 | 0.481  |
| NFK | 574 Norfolk Island   | 1.154 | 0.812 | 3.266  |
| NGA | 566 Nigeria          | 0.312 | 0.229 | 0.833  |
| NIC | 558 Nicaragua        | 0.992 | 0.768 | 2.671  |
| NIU | 570 Niue             | 0.177 | 0.205 | 0.472  |
| NLD | 528 Netherlands      | 0.037 | 0.042 | 0.108  |
| NOR | 578 Norway           | 2.409 | 1.245 | 8.516  |
| NPL | 524 Nepal            | 5.043 | 1.26  | 14.458 |
| NRU | 520 Nauru            | 0.311 | 0.527 | 0.781  |
| NZL | 554 New Zealand      | 2.038 | 0.451 | 6.233  |
| OMN | 512 Oman             | 1.109 | 0.896 | 3.012  |
| PAK | 586 Pakistan         | 1.949 | 0.341 | 5.665  |
| PAN | 591 Panama           | 1.54  | 0.546 | 4.128  |
| PCN | 612 Pitcairn         | 0.404 | 0.79  | 1.067  |
| PER | 604 Peru             | 1.347 | 0.991 | 3.653  |
| PHL | 608 Philippines      | 2.028 | 0.574 | 5.428  |
| PLW | 585 Palau            | 0.475 | 0.38  | 1.293  |
| PNG | 598 Papua New Gui    | 1.589 | 0.98  | 4.217  |
| POL | 616 Poland           | 0.297 | 0.259 | 0.951  |
| PRI | 630 Puerto Rico      | 1.447 | 0.699 | 3.928  |
| PRK | 408 Democratic Pec   | 2.521 | 0.884 | 7.681  |
| PRT | 620 Portugal         | 1.304 | 0.967 | 3.937  |
| PRY | 600 Paraguay         | 0.245 | 0.479 | 0.681  |
| PSE | 275 Occupied Pales   | 2.775 | 1.754 | 7.927  |
| PYF | 258 French Polynes   | 2.072 | 1.389 | 5.637  |
| QAT | 634 Qatar            | 0.181 | 0.156 | 0.493  |
| REU | 638 Réunion          | 3.873 | 0.962 | 10.657 |
| ROU | 642 Romania          | 1.267 | 0.555 | 4.005  |
| RUS | 643 Russian Federa   | 0.94  | 0.355 | 3.278  |
| RWA | 646 Rwanda           | 3.309 | 3.178 | 8.748  |
| SAU | 682 Saudi Arabia     | 0.914 | 0.688 | 2.514  |
| SCG | 891 Serbia and Mor   | 1.673 | 0.711 | 5.144  |
| SDN | 736 Sudan            | 0.442 | 0.292 | 1.186  |
| SEN | 686 Senegal          | 0.244 | 0.246 | 0.647  |
| SGP | 702 Singapore        | 0.016 | 0.004 | 0.036  |
| SHN | 654 Saint Helena     | 3.863 | 2.368 | 11.182 |
| SJM | 744 Svalbard and Ja  | 1.623 | 1.278 | 6.575  |
| SLB | 90 Solomon Island    | 1.54  | 1.109 | 4.111  |
| SLE | 694 Sierra Leone     | 0.498 | 0.574 | 1.317  |
| SLV | 222 El Salvador      | 1.75  | 1     | 4.746  |
| SMR | 674 San Marino       | 1.802 | 1.925 | 5.497  |
| SOM | 706 Somalia          | 0.65  | 0.45  | 1.711  |
| SPM | 666 Saint Pierre anc | 0.833 | 1.054 | 2.467  |
| STP | 678 Sao Tome and I   | 2.347 | 0.876 | 5.991  |
| SUR | 740 Suriname         | 0.307 | 0.034 | 0.815  |
| SVK | 703 Slovakia         | 1.56  | 0.672 | 5.043  |
| SVN | 705 Slovenia         | 2.496 | 0.746 | 7.713  |
| SWE | 752 Sweden           | 0.715 | 0.343 | 2.53   |
| SWZ | 748 Swaziland        | 3.063 | 2.301 | 8.574  |

|     |                       |       |       |        |
|-----|-----------------------|-------|-------|--------|
| SYC | 690 Seychelles        | 4.885 | 1.802 | 11.129 |
| SYR | 760 Syrian Arab Rep   | 0.756 | 0.741 | 2.174  |
| TCA | 796 Turks and Caicc   | 0.007 | 0.01  | 0.013  |
| TCD | 148 Chad              | 0.419 | 0.197 | 1.135  |
| TGO | 768 Togo              | 0.28  | 0.247 | 0.745  |
| THA | 764 Thailand          | 1.051 | 0.189 | 2.826  |
| TJK | 762 Tajikistan        | 5.301 | 1.033 | 15.976 |
| TKL | 772 Tokelau           | 0     | 0     | 0      |
| TKM | 795 Turkmenistan      | 0.284 | 0.248 | 0.834  |
| TLS | 626 Timor-Leste       | 1.85  | 1.286 | 5.001  |
| TON | 776 Tonga             | 0.773 | 0.07  | 1.992  |
| TTO | 780 Trinidad and Tc   | 0.603 | 0.521 | 1.611  |
| TUN | 788 Tunisia           | 0.726 | 0.585 | 2.079  |
| TUR | 792 Turkey            | 2.62  | 1.192 | 7.773  |
| TUV | 798 Tuvalu            | 0.025 | 0.02  | 0.055  |
| TWN | 158 Taiwan            | 3.49  | 0.429 | 9.785  |
| TZA | 834 United Republi    | 0.677 | 0.541 | 1.814  |
| UGA | 800 Uganda            | 0.913 | 0.779 | 2.424  |
| UKR | 804 Ukraine           | 0.416 | 0.359 | 1.317  |
| UMI | 581 United States N   | 0.005 | 0.035 | 0.011  |
| URY | 858 Uruguay           | 0.435 | 0.391 | 1.283  |
| USA | 840 United States o   | 1.073 | 0.333 | 3.384  |
| UZB | 860 Uzbekistan        | 0.526 | 0.243 | 1.589  |
| VAT | 336 Holy See          | 0.438 | 0.428 | 1.162  |
| VCT | 670 Saint Vincent a   | 3.071 | 1.878 | 8.401  |
| VEN | 862 Venezuela (Boli   | 0.634 | 0.594 | 1.716  |
| VGB | 92 British Virgin Isl | 1.257 | 1.873 | 3.131  |
| VIR | 850 United States V   | 1.404 | 1.268 | 3.652  |
| VNM | 704 Viet Nam          | 2.054 | 0.439 | 5.603  |
| VUT | 548 Vanuatu           | 1.729 | 1.041 | 4.709  |
| WLF | 876 Wallis and Futu   | 1.306 | 0.977 | 3.505  |
| WSM | 882 Samoa             | 1.677 | 0.968 | 4.644  |
| YEM | 887 Yemen             | 2.323 | 2.197 | 6.155  |
| ZAF | 710 South Africa      | 1.761 | 1.318 | 4.942  |
| ZMB | 894 Zambia            | 0.533 | 0.506 | 1.422  |
| ZWE | 716 Zimbabwe          | 1.194 | 1.106 | 3.232  |

isocode                      isonum                      country                      rugged                      rugged\_popw                      rugged\_slope

MEAN OR TOT                      1.38                      3.94

SCALE OR TOT                      2.26 degree

With slope of 3.9.

ADD ANTARCTICA

What is slope % i

Slope degree                      Extra area                      3.94% = 2.26 deg

$$2.26 \times 3 = 6.78$$

10                      1.52

20                      6.38

30

| CHINA Ying 2014 - h deg | %     | Area  | %Diff  | %Diff check             |
|-------------------------|-------|-------|--------|-------------------------|
| 1.00                    | 12    | 21    | 0.9574 | 2.23                    |
| 10.00                   | 11.65 | 20.62 | 0.9562 | 2.10                    |
| 30.00                   | 10.92 | 19.29 | 0.9538 | 1.85                    |
| 100.00                  | 9     | 15.84 | 0.9482 | 1.25                    |
| Nunn & Pega 926         | 3.14  | 5.49  | 0.9378 | 0.14                    |
| 1000.00                 | 3.53  | 6.19  | 0.9383 | 0.19                    |
| 10000.00                | 0     | 0     | 0.9365 | 0.00                    |
| diff 1 vs 1000 times    | 3.40  | 3.39  | 1.0204 |                         |
| % Diff 1 vs 1,000       | 239.9 | 239.3 | 2.0    | 1,074 % inc in accuracy |
| % Diff 10 vs 1,000      | 230.0 | 233.1 | 1.9    |                         |

Ying et al. formula 1 is just for calculating hypotenuse length, not area

Area projected = bas slope deg pi/180 sum sec (= Ratio TS Area true = hypo  
400 8.8 0.01745 0.15356 1.011907302 404.7629

94 x 94

8836

10000

94

163833.022

**Square when sloped projects a rectangle if square on, or an irregular diamond shape if angled. Rel**

Area projected = bas slope deg sqrt = base pi/180 sum sec  
12 10 3.464 0.01745 0.1745 1.015420717

**Circle when sloped casts an ellipse - this is more constant thus is perhaps better for large area calc**

Area projected = bas slope deg diameter pi/180 (ln E sum sec  
400 8.8 22.56759287 0.01745 0.15356 1.011907302

**Circle only is wrong!!!!!!!!!!!!!!**

Area projected = bas slope deg diameter pi/180 sum sec  
400 8.8 22.56759287 0.01745 0.15356 1.011907302

If circular the above area diameter is

22.57

New area is

Corrugated sheet analogy Diff %

1.50% 203.04

10.50% 224.315

70% 381.34 90.67

Yang et al China stud area 1,000 ha Gha

China 932,748

Taiwan 3,615

HK 110

Macao 3

Total 936,476 936

Actual hypotenuse Projected base

As Ap

296,513 222,236

-25.050 -25.050 % Diff

Nunn & Puga, 2010 give examples of Terrain ruggedness index and these I compare to their slope in

| Country    | TRI | Slope % | Ratio  |      |         |
|------------|-----|---------|--------|------|---------|
| Netherland |     | 0.037   | 0.12   | 3.24 |         |
| Mauritania |     | 0.115   | 0.308  | 2.68 |         |
| Romania    |     | 1.267   | 4.005  | 3.16 |         |
| Zimbabwe   |     | 1.194   | 3.232  | 2.71 |         |
| Italy      |     | 2.458   | 7.506  | 3.05 |         |
| Djibouti   |     | 2.432   | 6.416  | 2.64 | radians |
| Nepal      |     | 5.043   | 14.458 | 2.87 |         |
| Lesotho    |     | 6.202   | 17.595 | 2.84 | 1 0.79  |
|            |     | MEAN    | 2.90   |      |         |

| CALCULATE GLOBAL AREA INCREASES |        |                 | 1,000 Ha  | %            | radians |
|---------------------------------|--------|-----------------|-----------|--------------|---------|
| isocode                         | isonum | country         | land_area | rugged_slope |         |
| ABW                             | 533    | Aruba           | 18        | 1.226        | 0.01    |
| AFG                             | 4      | Afghanistan     | 65209     | 7.414        | 0.07    |
| AGO                             | 24     | Angola          | 124670    | 2.274        | 0.02    |
| AIA                             | 660    | Anguilla        | 9         | 0.026        | 0.00    |
| ALB                             | 8      | Albania         | 2740      | 10.451       | 0.10    |
| AND                             | 20     | Andorra         | 47        | 17.774       | 0.18    |
| ANT                             | 530    | Netherlands Ar  | 80        | 0.68         | 0.01    |
| ARE                             | 784    | United Arab En  | 8360      | 2.112        | 0.02    |
| ARG                             | 32     | Argentina       | 273669    | 2.268        | 0.02    |
| ARM                             | 51     | Armenia         | 2820      | 8.178        | 0.08    |
| ASM                             | 16     | American Samc   | 20        | 7.032        | 0.07    |
| ATG                             | 28     | Antigua and Ba  | 44        | 0.012        | 0.00    |
| AUS                             | 36     | Australia       | 768230    | 0.405        | 0.00    |
| AUT                             | 40     | Austria         | 8245      | 11.095       | 0.11    |
| AZE                             | 31     | Azerbaijan      | 8260.5    | 5.08         | 0.05    |
| BDI                             | 108    | Burundi         | 2568      | 4.721        | 0.05    |
| BEL                             | 56     | Belgium         | 3023      | 1.239        | 0.01    |
| BEN                             | 204    | Benin           | 11062     | 0.377        | 0.00    |
| BFA                             | 854    | Burkina Faso    | 27360     | 0.638        | 0.01    |
| BGD                             | 50     | Bangladesh      | 13017     | 0.502        | 0.01    |
| BGR                             | 100    | Bulgaria        | 11063     | 4.498        | 0.04    |
| BHR                             | 48     | Bahrain         | 71        | 0.627        | 0.01    |
| BHS                             | 44     | Bahamas         | 1001      | 0.144        | 0.00    |
| BIH                             | 70     | Bosnia and Her  | 5120      | 7.075        | 0.07    |
| BLR                             | 112    | Belarus         | 20748     | 0.54         | 0.01    |
| BLZ                             | 84     | Belize          | 2281      | 1.616        | 0.02    |
| BMU                             | 60     | Bermuda         | 5         | 0.03         | 0.00    |
| BOL                             | 68     | Bolivia         | 108438    | 2.343        | 0.02    |
| BRA                             | 76     | Brazil          | 845942    | 0.654        | 0.01    |
| BRB                             | 52     | Barbados        | 43        | 2.581        | 0.03    |
| BRN                             | 96     | Brunei Darussa  | 527       | 1.366        | 0.01    |
| BTN                             | 64     | Bhutan          | 4700      | 19.325       | 0.19    |
| BWA                             | 72     | Botswana        | 56673     | 0.488        | 0.00    |
| CAF                             | 140    | Central African | 62300     | 0.528        | 0.01    |
| CAN                             | 124    | Canada          | 909351    | 2.695        | 0.03    |
| CCK                             | 166    | Cocos (Keeling) | 1         | 0.031        | 0.00    |
| CHE                             | 756    | Switzerland     | 4000      | 14.999       | 0.15    |

|     |                      |        |        |      |
|-----|----------------------|--------|--------|------|
| CHL | 152 Chile            | 74880  | 7.365  | 0.07 |
| CHN | 156 China            | 932748 | 5.493  | 0.05 |
| CIV | 384 Côte d'Ivoire    | 31800  | 0.594  | 0.01 |
| CMR | 120 Cameroon         | 46540  | 1.374  | 0.01 |
| COD | 180 Democratic Rep   | 226705 | 1.177  | 0.01 |
| COG | 178 Congo            | 34150  | 0.406  | 0.00 |
| COK | 184 Cook Islands     | 24     | 2.641  | 0.03 |
| COL | 170 Colombia         | 110950 | 2.376  | 0.02 |
| COM | 174 Comoros          | 186.1  | 9.049  | 0.09 |
| CPV | 132 Cape Verde       | 403    | 6.502  | 0.06 |
| CRI | 188 Costa Rica       | 5106   | 5.708  | 0.06 |
| CUB | 192 Cuba             | 10982  | 1.448  | 0.01 |
| CXR | 162 Christmas Islan  | 13.5   | 3.477  | 0.03 |
| CYM | 136 Cayman Islands   | 26     | 0.237  | 0.00 |
| CYP | 196 Cyprus           | 924    | 7.867  | 0.08 |
| CZE | 203 Czech Republic   | 7727   | 2.845  | 0.03 |
| DEU | 276 Germany          | 34877  | 1.906  | 0.02 |
| DJI | 262 Djibouti         | 2318   | 6.416  | 0.06 |
| DMA | 212 Dominica         | 75     | 0.005  | 0.00 |
| DNK | 208 Denmark          | 4243   | 0.611  | 0.01 |
| DOM | 214 Dominican Rep    | 4838   | 4.495  | 0.04 |
| DZA | 12 Algeria           | 238174 | 1.445  | 0.01 |
| ECU | 218 Ecuador          | 27684  | 3.446  | 0.03 |
| EGY | 818 Egypt            | 99545  | 2.001  | 0.02 |
| ERI | 232 Eritrea          | 10100  | 6.663  | 0.07 |
| ESH | 732 Western Sahara   | 26600  | 0.565  | 0.01 |
| ESP | 724 Spain            | 49900  | 5.062  | 0.05 |
| EST | 233 Estonia          | 4239   | 0.414  | 0.00 |
| ETH | 231 Ethiopia         | 100000 | 4.193  | 0.04 |
| FIN | 246 Finland          | 30459  | 1.202  | 0.01 |
| FJI | 242 Fiji             | 1827   | 3.723  | 0.04 |
| FLK | 238 Falkland Islands | 1217   | 0.859  | 0.01 |
| FRA | 250 France           | 55010  | 3.406  | 0.03 |
| FRO | 234 Faeroe Islands   | 140    | 8.215  | 0.08 |
| FSM | 583 Micronesia, Fed  | 70     | 3.61   | 0.04 |
| GAB | 266 Gabon            | 25767  | 0.583  | 0.01 |
| GBR | 826 United Kingdom   | 24269  | 1.878  | 0.02 |
| GEO | 268 Georgia          | 6949   | 11.258 | 0.11 |
| GHA | 288 Ghana            | 22754  | 0.601  | 0.01 |
| GIB | 292 Gibraltar        | 1      | 21.453 | 0.21 |
| GIN | 324 Guinea           | 24572  | 1.969  | 0.02 |
| GLP | 312 Guadeloupe       | 169    | 3.23   | 0.03 |
| GMB | 270 Gambia           | 1000   | 0.915  | 0.01 |
| GNB | 624 Guinea-Bissau    | 2812   | 1.302  | 0.01 |
| GNQ | 226 Equatorial Guir  | 2805   | 1.449  | 0.01 |
| GRC | 300 Greece           | 12890  | 9.166  | 0.09 |
| GRD | 308 Grenada          | 34     | 5.655  | 0.06 |
| GRL | 304 Greenland        | 217500 | 1.548  | 0.02 |
| GTM | 320 Guatemala        | 10843  | 4.893  | 0.05 |
| GUF | 254 French Guiana    | 8815   | 0.546  | 0.01 |

|     |                       |        |        |      |
|-----|-----------------------|--------|--------|------|
| GUM | 316 Guam              | 54     | 1.825  | 0.02 |
| GUY | 328 Guyana            | 19685  | 0.744  | 0.01 |
| HKG | 344 Hong Kong Spe     | 110    | 6.692  | 0.07 |
| HND | 340 Honduras          | 11189  | 5.824  | 0.06 |
| HRV | 191 Croatia           | 5592   | 3.842  | 0.04 |
| HTI | 332 Haiti             | 2756   | 6.448  | 0.06 |
| HUN | 348 Hungary           | 8962   | 1.09   | 0.01 |
| IDN | 360 Indonesia         | 181157 | 2.587  | 0.03 |
| IND | 356 India             | 297319 | 2.842  | 0.03 |
| IOT | 86 British Indian O   | 8      | 0.037  | 0.00 |
| IRL | 372 Ireland           | 6889   | 1.676  | 0.02 |
| IRN | 364 Iran, Islamic Re  | 162855 | 6.962  | 0.07 |
| IRQ | 368 Iraq              | 43737  | 1.919  | 0.02 |
| ISL | 352 Iceland           | 10025  | 5.318  | 0.05 |
| ISR | 376 Israel            | 2164   | 4.808  | 0.05 |
| ITA | 380 Italy             | 29411  | 7.506  | 0.07 |
| JAM | 388 Jamaica           | 1083   | 4.837  | 0.05 |
| JOR | 400 Jordan            | 8824   | 3.115  | 0.03 |
| JPN | 392 Japan             | 36450  | 6.275  | 0.06 |
| KAZ | 398 Kazakhstan        | 269970 | 1.172  | 0.01 |
| KEN | 404 Kenya             | 56914  | 1.781  | 0.02 |
| KGZ | 417 Kyrgyzstan        | 19180  | 13.105 | 0.13 |
| KHM | 116 Cambodia          | 17652  | 1.421  | 0.01 |
| KIR | 296 Kiribati          | 81     | 0.021  | 0.00 |
| KNA | 659 Saint Kitts and N | 26     | 0.012  | 0.00 |
| KOR | 410 Republic of Kor   | 9873   | 5.807  | 0.06 |
| KWT | 414 Kuwait            | 1782   | 0.691  | 0.01 |
| LAO | 418 Lao People's De   | 23080  | 6.976  | 0.07 |
| LBN | 422 Lebanon           | 1023   | 12.042 | 0.12 |
| LBR | 430 Liberia           | 9632   | 0.695  | 0.01 |
| LBY | 434 Libyan Arab Jar   | 175954 | 1.124  | 0.01 |
| LCA | 662 Saint Lucia       | 61     | 5.841  | 0.06 |
| LIE | 438 Liechtenstein     | 16     | 17.18  | 0.17 |
| LKA | 144 Sri Lanka         | 6463   | 1.712  | 0.02 |
| LSO | 426 Lesotho           | 3035   | 17.595 | 0.17 |
| LTU | 440 Lithuania         | 6268   | 0.578  | 0.01 |
| LUX | 442 Luxembourg        | 259    | 2.844  | 0.03 |
| LVA | 428 Latvia            | 6205   | 0.522  | 0.01 |
| MAC | 446 Macao Special A   | 3      | 1.921  | 0.02 |
| MAR | 504 Morocco           | 44630  | 6.853  | 0.07 |
| MCO | 492 Monaco            | 0      | 20.834 | 0.21 |
| MDA | 498 Republic of Mo    | 3288   | 2.527  | 0.03 |
| MDG | 450 Madagascar        | 58154  | 3.185  | 0.03 |
| MDV | 462 Maldives          | 30     | 0.024  | 0.00 |
| MEX | 484 Mexico            | 194395 | 4.795  | 0.05 |
| MHL | 584 Marshall Island   | 18     | 0.033  | 0.00 |
| MKD | 807 The former Yug    | 2543   | 8.19   | 0.08 |
| MLI | 466 Mali              | 122019 | 0.393  | 0.00 |
| MLT | 470 Malta             | 32     | 4.292  | 0.04 |
| MMR | 104 Myanmar           | 65755  | 5.517  | 0.06 |

|     |                                                  |         |        |      |
|-----|--------------------------------------------------|---------|--------|------|
| MNG | 496 Mongolia                                     | 156650  | 3.352  | 0.03 |
| MNP | 580 Northern Mariana                             | 46      | 4.572  | 0.05 |
| MOZ | 508 Mozambique                                   | 78638   | 1.653  | 0.02 |
| MRT | 478 Mauritania                                   | 103070  | 0.308  | 0.00 |
| MSR | 500 Montserrat                                   | 10      | 9.256  | 0.09 |
| MTQ | 474 Martinique                                   | 106     | 3.311  | 0.03 |
| MUS | 480 Mauritius                                    | 203     | 2.436  | 0.02 |
| MWI | 454 Malawi                                       | 9408    | 2.759  | 0.03 |
| MYS | 458 Malaysia                                     | 32855   | 2.684  | 0.03 |
| MYT | 175 Mayotte                                      | 37.4    | 5.809  | 0.06 |
| NAM | 516 Namibia                                      | 82329   | 2.489  | 0.02 |
| NCL | 540 New Caledonia                                | 1828    | 4.338  | 0.04 |
| NER | 562 Niger                                        | 126670  | 0.481  | 0.00 |
| NFK | 574 Norfolk Island                               | 4       | 3.266  | 0.03 |
| NGA | 566 Nigeria                                      | 91077   | 0.833  | 0.01 |
| NIC | 558 Nicaragua                                    | 12140   | 2.671  | 0.03 |
| NIU | 570 Niue                                         | 26      | 0.472  | 0.00 |
| NLD | 528 Netherlands                                  | 3388    | 0.108  | 0.00 |
| NOR | 578 Norway                                       | 30428   | 8.516  | 0.08 |
| NPL | 524 Nepal                                        | 14300   | 14.458 | 0.14 |
| NRU | 520 Nauru                                        | 2       | 0.781  | 0.01 |
| NZL | 554 New Zealand                                  | 26771   | 6.233  | 0.06 |
| OMN | 512 Oman                                         | 30950   | 3.012  | 0.03 |
| PAK | 586 Pakistan                                     | 77088   | 5.665  | 0.06 |
| PAN | 591 Panama                                       | 7443    | 4.128  | 0.04 |
| PCN | 612 Pitcairn                                     | 4.7     | 1.067  | 0.01 |
| PER | 604 Peru                                         | 128000  | 3.653  | 0.04 |
| PHL | 608 Philippines                                  | 29817   | 5.428  | 0.05 |
| PLW | 585 Palau                                        | 46      | 1.293  | 0.01 |
| PNG | 598 Papua New Guinea                             | 45286   | 4.217  | 0.04 |
| POL | 616 Poland                                       | 30436   | 0.951  | 0.01 |
| PRI | 630 Puerto Rico                                  | 887     | 3.928  | 0.04 |
| PRK | 408 Democratic People's Republic of Korea        | 12041   | 7.681  | 0.08 |
| PRT | 620 Portugal                                     | 9150    | 3.937  | 0.04 |
| PRY | 600 Paraguay                                     | 39730   | 0.681  | 0.01 |
| PSE | 275 Occupied Palestinian Territories             | 602     | 7.927  | 0.08 |
| PYF | 258 French Polynesia                             | 366     | 5.637  | 0.06 |
| QAT | 634 Qatar                                        | 1100    | 0.493  | 0.00 |
| REU | 638 Réunion                                      | 250     | 10.657 | 0.11 |
| ROU | 642 Romania                                      | 22971   | 4.005  | 0.04 |
| RUS | 643 Russian Federation                           | 1638134 | 3.278  | 0.03 |
| RWA | 646 Rwanda                                       | 2467    | 8.748  | 0.09 |
| SAU | 682 Saudi Arabia                                 | 214969  | 2.514  | 0.03 |
| SCG | 891 Serbia and Montenegro                        | 10200   | 5.144  | 0.05 |
| SDN | 736 Sudan                                        | 237600  | 1.186  | 0.01 |
| SEN | 686 Senegal                                      | 19253   | 0.647  | 0.01 |
| SGP | 702 Singapore                                    | 67      | 0.036  | 0.00 |
| SHN | 654 Saint Helena, Ascension and Tristan da Cunha | 39      | 11.182 | 0.11 |
| SJM | 744 Svalbard and Jan Mayen                       | 0       | 6.575  | 0.07 |
| SLB | 90 Solomon Island                                | 2799    | 4.111  | 0.04 |

|     |     |                                      |        |        |      |
|-----|-----|--------------------------------------|--------|--------|------|
| SLE | 694 | Sierra Leone                         | 7162   | 1.317  | 0.01 |
| SLV | 222 | El Salvador                          | 2072   | 4.746  | 0.05 |
| SMR | 674 | San Marino                           | 6      | 5.497  | 0.05 |
| SOM | 706 | Somalia                              | 62734  | 1.711  | 0.02 |
| SPM | 666 | Saint Pierre and                     | 23     | 2.467  | 0.02 |
| STP | 678 | Sao Tome and P                       | 96     | 5.991  | 0.06 |
| SUR | 740 | Suriname                             | 15600  | 0.815  | 0.01 |
| SVK | 703 | Slovakia                             | 4810   | 5.043  | 0.05 |
| SVN | 705 | Slovenia                             | 2014   | 7.713  | 0.08 |
| SWE | 752 | Sweden                               | 41033  | 2.53   | 0.03 |
| SWZ | 748 | Swaziland                            | 1720   | 8.574  | 0.09 |
| SYC | 690 | Seychelles                           | 46     | 11.129 | 0.11 |
| SYR | 760 | Syrian Arab Rep                      | 18378  | 2.174  | 0.02 |
| TCA | 796 | Turks and Caicos                     | 43     | 0.013  | 0.00 |
| TCD | 148 | Chad                                 | 125920 | 1.135  | 0.01 |
| TGO | 768 | Togo                                 | 5439   | 0.745  | 0.01 |
| THA | 764 | Thailand                             | 51089  | 2.826  | 0.03 |
| TJK | 762 | Tajikistan                           | 13996  | 15.976 | 0.16 |
| TKL | 772 | Tokelau                              | 1      | 0      | 0.00 |
| TKM | 795 | Turkmenistan                         | 46993  | 0.834  | 0.01 |
| TLS | 626 | Timor-Leste                          | 1487   | 5.001  | 0.05 |
| TON | 776 | Tonga                                | 72     | 1.992  | 0.02 |
| TTO | 780 | Trinidad and Tobago                  | 513    | 1.611  | 0.02 |
| TUN | 788 | Tunisia                              | 15536  | 2.079  | 0.02 |
| TUR | 792 | Turkey                               | 76963  | 7.773  | 0.08 |
| TUV | 798 | Tuvalu                               | 3      | 0.055  | 0.00 |
| TWN | 158 | Taiwan                               | 3615   | 9.785  | 0.10 |
| TZA | 834 | United Republic of Tanzania          | 88580  | 1.814  | 0.02 |
| UGA | 800 | Uganda                               | 19710  | 2.424  | 0.02 |
| UKR | 804 | Ukraine                              | 57935  | 1.317  | 0.01 |
| UMI | 581 | United States Minor Outlying Islands | 0      | 0.011  | 0.00 |
| URY | 858 | Uruguay                              | 17502  | 1.283  | 0.01 |
| USA | 840 | United States of America             | 916192 | 3.384  | 0.03 |
| UZB | 860 | Uzbekistan                           | 42540  | 1.589  | 0.02 |
| VAT | 336 | Holy See                             | 0      | 1.162  | 0.01 |
| VCT | 670 | Saint Vincent and the Grenadines     | 39     | 8.401  | 0.08 |
| VEN | 862 | Venezuela (Bolivarian Republic of)   | 88205  | 1.716  | 0.02 |
| VGB | 92  | British Virgin Islands               | 15     | 3.131  | 0.03 |
| VIR | 850 | United States Virgin Islands         | 35     | 3.652  | 0.04 |
| VNM | 704 | Viet Nam                             | 31106  | 5.603  | 0.06 |
| VUT | 548 | Vanuatu                              | 1219   | 4.709  | 0.05 |
| WLF | 876 | Wallis and Futuna                    | 14     | 3.505  | 0.04 |
| WSM | 882 | Samoa                                | 283    | 4.644  | 0.05 |
| YEM | 887 | Yemen                                | 52797  | 6.155  | 0.06 |
| ZAF | 710 | South Africa                         | 121447 | 4.942  | 0.05 |
| ZMB | 894 | Zambia                               | 74339  | 1.422  | 0.01 |
| ZWE | 716 | Zimbabwe                             | 38685  | 3.232  | 0.03 |

isocode                      isonum                      country                      13193676 rugged\_popw TOTs or MEANs  
MEAN OR TOT                      24897.11  
SCALE OR TOT                      ADD ANTARCTIC/



Duursman & Poisson O2 and CO2 tab. To convert mols to g for O2 x 32; for C x 12 .

|                     | Air   | Sea        | Land | Tot    | % Air                   |
|---------------------|-------|------------|------|--------|-------------------------|
| mol O2              | 3.75  | 0.031      |      | 3.78   | 99.2                    |
| mol CO2-C           | 0.053 | 2.9        |      | 2.953  | 1.8                     |
| O2 g (mol x 16 x 2) | 120   | 0.992 na   |      | 120.99 | 99.2                    |
| C g (mol x 12)      | 0.636 | 34.8       |      | 35.44  | 1.8                     |
| D & P data for C    | 0.64  | 0.35       |      |        | 35.64 This may be their |
| C in CO2 is x 0.273 | 44    | 12.012 QED |      |        |                         |

| Carbon Gt | Gt       | %     |     | stored C   |
|-----------|----------|-------|-----|------------|
| air       | 640      | 0.00  | tot | 16,000,000 |
| land      | 81000000 | 99.96 |     | 65,000,000 |
| sea       | 35000    | 0.04  |     | 40,000     |
| Tot       | 81035640 | 100   |     | 1,350      |
|           |          |       | tot | 81,041,350 |

|       | Area Gha | mean mol<br>Org-C /m <sup>2</sup> /yr | Total Org<br>C/yr (%)                | mol<br>O <sub>2</sub> /m <sup>2</sup> /yr | Total O <sub>2</sub> /yr (%)      |
|-------|----------|---------------------------------------|--------------------------------------|-------------------------------------------|-----------------------------------|
| Land  | 15       | 12                                    | 1.84 x<br>10 <sup>15</sup><br>(46%)  | 12                                        | 1.84 x 10 <sup>15</sup><br>(44%)  |
| Sea   | 36       | 6                                     | 2.16 x<br>10 <sup>15</sup><br>(54%)  | 6.45                                      | 2.32 x 10 <sup>15</sup><br>(56%)  |
| Total | 51       |                                       | 4.00 x<br>10 <sup>15</sup><br>(100%) |                                           | 4.16 x 10 <sup>15</sup><br>(100%) |

|     |        |        |
|-----|--------|--------|
|     | x 10   | 15     |
| 180 | 180.00 | 180.00 |
|     | 216.00 | 232.20 |
| Tot | 396.00 | 412.20 |

Oxygen imbalance

|                 | mol x 10 15 | Gt        | %    |             |
|-----------------|-------------|-----------|------|-------------|
| humus + biomass | 180         | 5,760     | 0.48 | 1.904258133 |
| fossil fuel     | 1,520       | 48,640    | 4.02 |             |
| atm             | 37,810      | 1,209,920 | 100  |             |
| tot             |             |           |      |             |

| Gha | C NPP | Tot  | Inc    | % inc  |
|-----|-------|------|--------|--------|
|     | 15    | 1.44 | 21.6   | 22.725 |
|     | 13.2  | 1.44 | 19.008 | 20.133 |
|     |       |      |        | 5.2    |
|     |       |      |        | 5.9    |
|     |       |      |        | 5.6    |

| Flat areas Gha     | CIA | FAO   | %     |
|--------------------|-----|-------|-------|
| Land               |     | 14.98 | 13.01 |
| Antarctica Gha     |     |       | 1.40  |
| Greenland glaciers |     |       | 0.18  |
| Rivers/lakes       |     |       | 0.37  |
| TOTAL              |     | 14.98 | 14.96 |
| Total less water   |     |       | 14.59 |

| Milevski & Milevski | 2015         |
|---------------------|--------------|
| res                 | slope degree |
| 1                   | 2            |
| 5                   | 11           |
| 15                  | 10.8         |
| 20                  | 10.8         |
| 30                  | 10.1         |
| 90                  | 8.8          |
|                     | 0            |

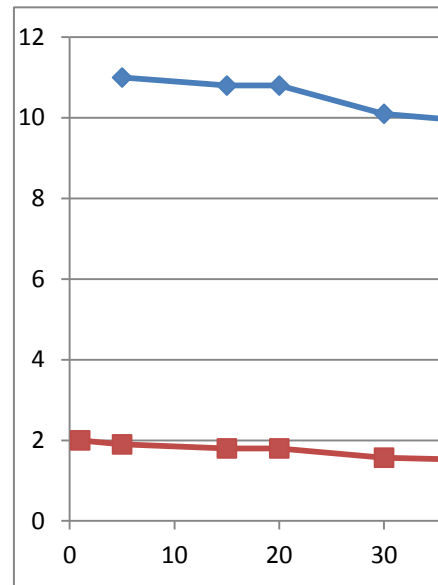

#### MAIN GRAPH ON COARSE TOPOGRAPHY AND REFINED ROUGHNESS

| Level of analysis | scale | Surface +% | Hilly | Author(s)           |
|-------------------|-------|------------|-------|---------------------|
| 1 km Astronomy    | >1    | 0.0        | n     | NASA/NOAA           |
| 2 km              | >1    | 0.0        | n     | Ying et al.         |
| 1 m               | 1     | 4.5        | n     | Ying et al. (projec |
| 2 m               | 1     | 2.0        | ?     | Milevski & Milevs   |
| 3 m               | 1     | 0.6        | n     | Nunn & Puga (rec    |
| 4 m               | 5     | 1.9        | ?     | Milevski & Milevs   |
| 5 m               | 30    | 4.6        | n     | Ying et al.         |
| 6 m               | 24-71 | 56.1       | y     | Anon.               |
| 7 m               | 90    | 25.0       | y     | Rashid              |
| 8 m               | 90    | 12.0       | y     | Sutton & Lopez      |
| 9 m               | 90    | 7.7        | y     | Zhang et al.        |
| 10 m              | 90    | 1.2        | ?     | Milevski & Milevs   |
| 11 m              | 100   | 180.0      | y     | Nogués-Bravo & /    |
| 12 m              | 100   | 3.8        | n     | Ying et al.         |
| 13 m              | 500   | 30.0       | y     | Nogués-Bravo & /    |
| 14 m              | 926   | 0.2        | n     | Nunn & Puga         |
| 15 m              | 1,000 | 10.0       | y     | Nogués-Bravo & /    |
| 16 m              | 1,000 | 0.5        | n     | Ying et al.         |
| 0 dm              | -     | -          | -     | -                   |

|                    |              |         |                     |
|--------------------|--------------|---------|---------------------|
| 1 cm               | 1            | 26.0 -  | Martin et al. (reci |
| 2 cm               | 1            | 33.0 -  | Bramorski et al.    |
| 3 cm               | 1            | 57.0 -  | Bramorski et al. (i |
| 4 cm               | 1            | 260.0 - | Bramorski et al. (i |
| 1 mm               | 1            | 163.0 - | Grims               |
| 2 mm               | 1            | 60.0 -  | Koiter              |
| 3 mm               | 3            | 23.0 -  | Helming et al.      |
| 4 mm               | 4            | 35.0 -  | Kamphorst et al.    |
| 5 mm               | 90           | 100.0 - | Mirazai et al.      |
| 1 µm-nm Microbiolo | 1 millions % | -       | various             |

84.11111111

or

|                  |                               |       |      |      |
|------------------|-------------------------------|-------|------|------|
| BUT MANY CONTRIE | 1 m scale mean (not mountain) | 2.57  | % or | 2.38 |
| HAVE MOUNTS      | 1 cm scale                    | 94.00 | %    |      |
|                  | <1 mm >1µm scale              | 108.2 |      |      |

|                     |    |       |             |       |
|---------------------|----|-------|-------------|-------|
| If have all reports | m  | 21.25 |             | 18.2  |
|                     | cm | 94.00 |             | 18.77 |
|                     | mm | 108.2 | NEW LAND =  | 42.08 |
|                     |    |       | NEW WORLD = | 78.08 |

NPP productivity Mean land : 39.0 Mean world =

If the land does go up then the productivity of 1.44 C /yr gives new total of ..

| Gha land or ocean | Productivity C/ C Gt | %    |       |   |
|-------------------|----------------------|------|-------|---|
| 39.0              | 1.44                 | 56.2 | 68    | 2 |
| 36                | 0.72                 | 25.9 | 32    | 1 |
| 75.0 Total        |                      | 82.1 | 100.0 |   |

If the land does go up to 64 then the productivity of 1.44 C /yr gives new total ..

| Gha land or ocean | Productivity C/ C Gt | %     |    |  |
|-------------------|----------------------|-------|----|--|
| 64.0              | 1.44                 | 92.2  | 78 |  |
| 36                | 0.72                 | 25.9  | 22 |  |
| 100.0 Total       |                      | 118.1 |    |  |

So... productivity on land is increased from 21.6 G to 82.6 Gt or fourfold.

Productivity overall goes from about 48 Gt to about 108 Gt or doubled.

Missing sink and NPP method

|                       |          |      |
|-----------------------|----------|------|
| If terrain 5.1%       | 15.8 Gha |      |
| Then times 94%        | 30.6 Gha |      |
| Then 76.2%            | 53.9 Gha |      |
| Multiplication factor |          | 3.42 |
| If 3.5 x              | 55.2     |      |

Coastline of Britain

| Length of Ruler m | Length of Coast km |
|-------------------|--------------------|
| 10                | 48,000             |
| 1                 | 50,000             |
| 0.01              | 75,000             |

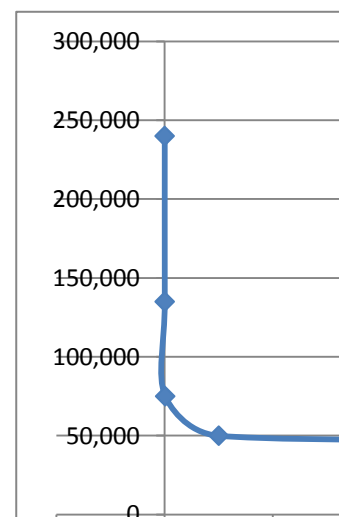

0.001 135,000  
0.0001 240,000  
-1

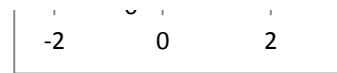

#### MODELLING MEANS

| Land Gha | Model mean dm | New dm | Model mean cm | Model mean mm    |
|----------|---------------|--------|---------------|------------------|
| 15       | 1.8           | 27     | 1.8           | 48.6             |
|          |               |        |               | 1.8              |
|          |               |        |               | sea              |
|          |               |        |               | Tot              |
|          |               |        |               | Ratio soil : sea |
|          |               |        |               | % soil : sea     |

Biome productivity from Campbell's Biology (2008) - <https://slideplayer.com/slide/6548420/23/ima>

| Biome                  | %    | Global area Gh | NPP (g/m2/ % NPP | Gt/yr |       |
|------------------------|------|----------------|------------------|-------|-------|
| Open ocean             | 65   | 33.15          | 125              | 24.4  | 41.4  |
| Cont. shelf            | 5.2  | 2.65           | 360              | 5.6   | 9.5   |
| Mangrove/Estuary       | 0.3  | 0.15           | 1,500            | 1.2   | 2.3   |
| Algal bed/Coral reef   | 0.1  | 0.05           | 2,500            | 0.9   | 1.3   |
| Upwelling zone         | 0.1  | 0.05           | 500              | 0.1   | 0.3   |
| Desert, rock, sand, ic | 4.7  | 2.40           | 3                | 0.04  | 0.1   |
| Semi-desert            | 3.5  | 1.79           | 90               | 0.9   | 1.6   |
| Tropical rainforest    | 3.3  | 1.68           | 2,200            | 22    | 37.0  |
| Savannah               | 2.9  | 1.48           | 900              | 7.9   | 13.3  |
| Cultivated land        | 2.7  | 1.38           | 650              | 9.1   | 9.0   |
| Boreal forest (taiga)  | 2.4  | 1.22           | 800              | 9.6   | 9.8   |
| Temp. grassland        | 1.8  | 0.92           | 600              | 5.4   | 5.5   |
| Wood and Shrub         | 1.7  | 0.87           | 700              | 3.5   | 6.1   |
| Tundra/Alpine          | 1.6  | 0.82           | 140              | 0.6   | 1.1   |
| Tropical decid forest  | 1.5  | 0.77           | 1,600            | 7.1   | 12.2  |
| Temperate decid for    | 1.3  | 0.66           | 1,200            | 4.9   | 8.0   |
| Temperate evergreener  | 1    | 0.51           | 1,300            | 3.8   | 6.6   |
| Swamp & marsh          | 0.4  | 0.20           | 2,000            | 2.3   | 4.1   |
| Lake & stream          | 0.4  | 0.20           | 250              | 0.3   | 0.5   |
| TOTAL                  | 99.9 | 50.95          | 17,418           | 110   | 170   |
| OUT BY +10!            |      |                |                  |       |       |
| Total Ocean            | 70.7 | 36.1           | 138.5            | 32.2  | 54.8  |
| Total Land             | 28.4 | 14.5           | 678.9            | 74.8  | 110.3 |
| Total water            | 0.8  | 0.4            | 900.0            | 2.6   | 4.6   |
| TOTAL                  |      |                |                  |       | 169.7 |

The data in the table above is from R.H. Whittaker, quoted by Stiling (1996) "Ecology: Theories and

#### FINAL NPP TABLE

| NPP Totals          | C g/m2/yr | C g/m2/yr | C Gt/yr  | C Gt/yr | TOTAL NPP Gt C |
|---------------------|-----------|-----------|----------|---------|----------------|
| For 15 Gha land     | Rate land | Rate sea  | Tot land | Tot sea |                |
| Duursma & Boisson   | 144       | 72        | 21.6     | 25.9    | 48             |
| Whitman et al. 1989 | -         | -         | 48       | 51      | 99             |
| Stiling (1996)      | 773       | 152       | 115      | 55      | 170            |
| UNEP (2002)         | -         | -         | 56.4     | 48.5    | 105            |
| Campbell (2008) rec | 678.9     | 138.5     | 110.3    | 54.8    | 165            |
| NASA (2011)         | -         | -         | 93       | -       | -              |
| For 30 Gha land     | 725.95    | 145.25    | 218      | 52      | 270            |

|                    |           |              |              |             |                      |
|--------------------|-----------|--------------|--------------|-------------|----------------------|
| For 60 Gha land    | 725.95    | 145.25       | <b>436</b>   | <b>52</b>   | <b>488</b>           |
| Mean of all rates  | 532.0     | 120.8        | 74.1         | 47.0        | 121                  |
| Check rate by area | C g/m2/yr | C g/m2/yr    | C Gt/yr      | C Gt/yr     | These data are ap    |
| D & B              | 144       | 72           | 21.6         | 25.9        |                      |
| Stiling            | 773       | 152          | 116.0        | 54.7        |                      |
| Campbell           | 678.9     | 138.5        | <b>101.8</b> | <b>49.9</b> | OK this is a bit dif |
| For 30 Gha land    |           | mean x 2 --> | 217.785      | 52.29       | <--just mean         |

| Biome            | Above C Gt | Below C GT  | Sharlemann et al.14 - <a href="https://www.tandfonli">https://www.tandfonli</a> |
|------------------|------------|-------------|---------------------------------------------------------------------------------|
| Tropical wet     | 140        | 128         |                                                                                 |
| Tropical moist   | 152        | 150         |                                                                                 |
| Tropical dry     | 42         | 137         |                                                                                 |
| Tropical montane | 40         | 55          |                                                                                 |
| Warm temp moist  | 28         | 63          |                                                                                 |
| Warm temp dry    | 23         | 78          |                                                                                 |
| Cool temp moist  | 25         | 210         |                                                                                 |
| Cool temp dry    | 9          | 100         |                                                                                 |
| Boreal moist     | 23         | 366         |                                                                                 |
| Boreal dry       | 5          | 68          |                                                                                 |
| Polar moist      | 2          | 50          |                                                                                 |
| Polar dry        | 0          | 10          |                                                                                 |
| <b>Total</b>     | <b>489</b> | <b>1415</b> |                                                                                 |

Bar-On et al. 2018 global biomass estimates (corrected by RJB in red)

| Biomass in Gt C    | Land        | Ocean      |
|--------------------|-------------|------------|
| Trees              | 450         |            |
| Bacteria           |             |            |
| Terr deep microbes | 60          |            |
| Mar deep microbes  |             | 7          |
| Soil               | 7           |            |
| Marine             |             | 1.3        |
| Fungi ???          | 12          |            |
| Archaea            |             |            |
| Terr deep microbes | 4           |            |
| Mar deep microbes  |             | 3          |
| Soil               | 0.5         |            |
| Marine             |             | 0.3        |
| Protists??         | 2           | 2          |
| Animals            |             |            |
| Fish               |             | <b>0.5</b> |
| Livestock          | 0.1         |            |
| Humans             | 0.06        |            |
| Wild mammals       | 0.007       |            |
| Wild birds         | 0.002       |            |
| Arthropods         | 0.2         | 1          |
| Annelids           | <b>0.82</b> |            |
| Molluscs           |             | 0.2        |
| Cnidarinas         |             | 0.1        |
| Nematodes          | 0.02        |            |
| Viruses ??         | 0.1         | 0.1        |

|                 |       |      |       |
|-----------------|-------|------|-------|
| Totals          | 536.8 | 15.5 | 552.3 |
| %               | 97.2  | 2.8  |       |
| Tot all animals | 1.309 | 1.4  |       |

#### Life on Earth calculation in Gt carbon

|                       | Land  | Sea  |       |
|-----------------------|-------|------|-------|
| Plants above ground   | 492   |      | 900   |
| Roots                 | 241   |      | 10000 |
| Bacteria              | 241   | 6.3  | 800   |
| VAM hyphae            | 15    |      | 2000  |
| Earthworms            | 4     |      | 15    |
| Fish*                 |       | 0.5  |       |
| Other organisms**     | 7.0   | 8.0  |       |
| Total                 | 1,000 | 14.8 |       |
| Total x 2 for terrain | 2,000 | 14.8 |       |
| Proportion %          | 99.3  | 0.7  |       |

\* From Bar-On (2018)

NPP from UNEP - <https://archive.org/stream/worldatlasofbiod02groo#page/10/mode/2up>

|       | Terrestrial | Ocean | Total |
|-------|-------------|-------|-------|
|       | 56.4        | 48.5  | 104.9 |
|       | 83          | 90    | 173   |
| trf   | 17.8        |       |       |
|       | 1.5         |       |       |
|       | 3.1         |       |       |
|       | 3.1         |       |       |
|       | 1.4         |       |       |
|       | 16.8        |       |       |
|       | 2.4         |       |       |
|       | 1           |       |       |
|       | 0.8         |       |       |
|       | 0.5         |       |       |
|       | 8           |       |       |
| Total | 56.4        |       |       |

|                                            | Giga | Wt tonnes | Tot Gt |
|--------------------------------------------|------|-----------|--------|
| Humans                                     |      | 7000      |        |
| Farm stock and pets                        |      |           |        |
| Wild mammals                               |      |           |        |
| Wild Mammals                               |      |           |        |
| 10,000 BCE                                 |      | 300       |        |
| 1900                                       |      | 50        |        |
| 2018                                       |      | 25        |        |
| Biomass (Mt) and extinctions (from http:// |      |           |        |
| 2018                                       |      |           |        |
| Wild mammals                               |      | 25        |        |
| Farm stock & pets                          |      | 1400      |        |
| Humans                                     |      | 350       |        |

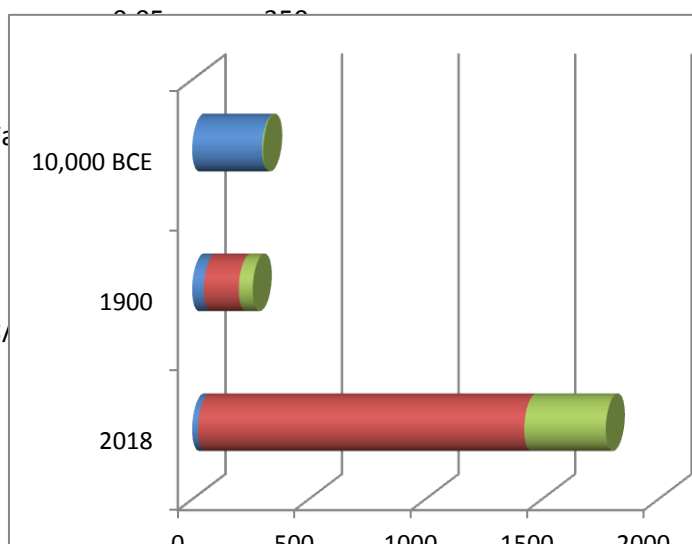

|  |   |     |      |      |      |
|--|---|-----|------|------|------|
|  | 0 | 500 | 1000 | 1500 | 2000 |
|--|---|-----|------|------|------|

Lal 2008 fig. 1 - [https://www.researchgate.net/publication/200736458\\_Sequestration\\_of\\_atmospheric\\_carbon\\_cycles\\_in\\_detail](https://www.researchgate.net/publication/200736458_Sequestration_of_atmospheric_carbon_cycles_in_detail).

Cf FAO for Grasslands... <http://www.fao.org/docrep/008/y8344e/y8344e05.htm>

|                         | %    | Gha    | %    | FAO % | Diff |
|-------------------------|------|--------|------|-------|------|
| Desert, rock, sand, ice | 4.7  | 2.40   | 16.5 |       |      |
| Semi-desert             | 3.5  | 1.79   | 12.3 |       |      |
| Tropical rainforest     | 3.3  | 1.68   | 11.6 |       |      |
| Savannah                | 2.9  | 1.48   | 10.2 | 13.8  | 26.1 |
| Cultivated land         | 2.7  | 1.38   | 9.5  |       |      |
| Boreal forest (taiga)   | 2.4  | 1.22   | 8.4  |       |      |
| Temp. grassland         | 1.8  | 0.92   | 6.3  |       |      |
| Wood and Shrub          | 1.7  | 0.87   | 6.0  |       |      |
| Tundra/Alpine           | 1.6  | 0.82   | 5.6  | 5.7   |      |
| Tropical decid forest   | 1.5  | 0.77   | 5.3  |       |      |
| Temperate decid forest  | 1.3  | 0.66   | 4.6  |       |      |
| Temperate evergreen     | 1    | 0.51   | 3.5  |       |      |
| Tot                     | 28.4 | 14.484 | 99.9 |       |      |

R.J.B. Supplementary file 2 of soil carbon budgets from October, 2018, R.J.B - Soil carbon budgets (0

| Biome             | A<br>Area Gha | B<br>SOC kg/m2 | A x B =<br>Area x SOC | Total SOC Gt | % area                   |
|-------------------|---------------|----------------|-----------------------|--------------|--------------------------|
| Boreal forest     | 1.2           | 12.5           | 15.00                 | 150          | 9.9                      |
| Crops             | 1.4           | 17.7           | 24.78                 | 248          | 11.6                     |
| Deserts           | 1.8           | 11.5           | 20.70                 | 208          | 14.9                     |
| Dry shrubs        | 0.85          | 14.6           | 12.41                 | 124          | 7.0                      |
| Temp decid forest | 0.7           | 22.8           | 15.96                 | 160          | 5.8                      |
| Temp everg forest | 0.5           | 20.4           | 10.20                 | 102          | 4.1                      |
| Temp grass        | 0.9           | 19.1           | 17.19                 | 172          | 7.4                      |
| Trop decid forest | 0.75          | 29.1           | 21.83                 | 218          | 6.2                      |
| Trop everg forest | 1.7           | 27.9           | 47.43                 | 474          | 14.0                     |
| Trop savannah     | 1.5           | 23             | 34.50                 | 345          | 12.4                     |
| Tundra            | 0.8           | 18             | 14.40                 | 144          | 6.6                      |
| <b>Total</b>      | <b>12.1</b>   | <b>216.6</b>   | <b>234.40</b>         | <b>2,345</b> | <b>100</b>               |
| <b>MEAN TOTAL</b> |               | <b>19.7</b>    | <b>238.26</b>         | <b>2,383</b> | <b>SO THIS DOES WORK</b> |

Sorted by area

| Biome             | Area Gha | SOC 0-3m kg/m tot | SOC 0-3 m Gt |
|-------------------|----------|-------------------|--------------|
| Deserts           | 1.8      | 11.5              | 20.70        |
| Trop everg forest | 1.7      | 27.9              | 47.43        |
| Trop savannah     | 1.5      | 23                | 34.50        |
| Crops             | 1.4      | 17.7              | 24.78        |
| Boreal forest     | 1.2      | 12.5              | 15.00        |
| Temp grass        | 0.9      | 19.1              | 17.19        |

|                   |      |       |        |      |
|-------------------|------|-------|--------|------|
| Dry shrubs        | 0.85 | 14.6  | 12.41  | 124  |
| Tundra            | 0.8  | 18    | 14.40  | 144  |
| Trop decid forest | 0.75 | 29.1  | 21.83  | 218  |
| Temp decid forest | 0.7  | 22.8  | 15.96  | 160  |
| Temp everg forest | 0.5  | 20.4  | 10.20  | 102  |
| Total             | 12.1 | 216.6 | 234.40 | 2345 |

### Combined and SORTED BY AREA!!

| Biome            | Area Gha    | SOC kg/m2 | Index (Area | Total SOC Gt | % area     |
|------------------|-------------|-----------|-------------|--------------|------------|
| Tropical forest  | 2.45        | 57.0      | 1.00        | 692          | 20.2       |
| Deserts          | 1.8         | 11.5      | 0.15        | 208          | 14.9       |
| Trop savannah    | 1.5         | 23.0      | 0.25        | 345          | 12.4       |
| Crops            | 1.4         | 17.7      | 0.18        | 248          | 11.6       |
| Temperate forest | 1.2         | 43.2      | 0.37        | 262          | 9.9        |
| Boreal forest    | 1.2         | 12.5      | 0.11        | 150          | 9.9        |
| Temp grass       | 0.9         | 19.1      | 0.12        | 172          | 7.4        |
| Dry shrubs       | 0.85        | 14.6      | 0.09        | 124          | 7.0        |
| Tundra           | 0.8         | 18.0      | 0.10        | 144          | 6.6        |
| <b>Total</b>     | <b>12.1</b> |           |             | <b>2345</b>  | <b>100</b> |

From IPCC (2000: tab. 1) <https://www.ipcc.ch/pdf/special-reports/spm/srl-en.pdf> also called Watson Table of Global Carbon (Gt C) stocks in veggies and top 1 m soils (often doubled at 1-3 m)

| Biome               | Area Gha     | Plants        | Soils          | Total C        | Area %       |
|---------------------|--------------|---------------|----------------|----------------|--------------|
| Desert and arid     | 4.55         | 8             | 191            | 199            | 30.1         |
| Tropical savannah   | 2.25         | 66            | 264            | 330            | 14.9         |
| Tropical forest     | 1.76         | 212           | 216            | 428            | 11.6         |
| Crops               | 1.60         | 3             | 128            | 131            | 10.6         |
| Boreal forest       | 1.37         | 88            | 471            | 559            | 9.1          |
| Temperate grassland | 1.25         | 9             | 295            | 304            | 8.3          |
| Temperate forest    | 1.04         | 59            | 100            | 159            | 6.9          |
| Tundra              | 0.95         | 6             | 121            | 127            | 6.3          |
| Wetlands            | 0.35         | 15            | 225            | 240            | 2.3          |
| <b>Total</b>        | <b>15.12</b> | <b>466.00</b> | <b>2011.00</b> | <b>2477.00</b> | <b>100.0</b> |

From Watson et al.  
(2000). Land Use,  
Land Use Change  
and

Forestry. 375pp.

Cambridge

University Press,

Cambridge, UK on

website

[https://www.cbd.int/doc/external/cop-](https://www.cbd.int/doc/external/cop-09/fao-factsheet-en.pdf)

09/fao-factsheet-

en.pdf .

<https://www.ipcc.ch/pdf/special-reports/spm/srl-en.pdf>



Economic value from land and sea from Costanza et al 2014 - <http://wedocs.unep.org/bitstream/ha>

|              |         |      |
|--------------|---------|------|
|              | 2,011   |      |
|              | 1,368   |      |
|              | 660     |      |
|              | 8,944   |      |
|              | 28,916  |      |
|              | 352,249 |      |
|              | 2,222   |      |
| Total Ocean  | 396,370 |      |
|              | 4,901   |      |
|              | 3,800   |      |
|              | 5,382   |      |
|              | 3,137   |      |
|              | 4,166   |      |
|              | 140,174 |      |
|              | 193,843 |      |
|              | 25,681  |      |
|              | 12,512  |      |
|              | 5,567   |      |
|              | 6,661   |      |
| Total Land   | 405,824 |      |
| Diff         | 1.0     |      |
| land         | 15,323  |      |
| Lakes/rivers | 200     |      |
| %            | -       | 98.7 |
|              |         | 1.3  |

#### Table of SOC deficits as revealed by BD shortfalls

| SOC (1.3%) | Depth m (Auth.)         | Soil Gt | Volume Gm | Density gm-3 | For 1.35 gm-3 |
|------------|-------------------------|---------|-----------|--------------|---------------|
|            | 1,500 1 (IPCC, 4p1000)  | 115,385 | 120,000   | 0.96         | 1.4           |
|            | 1,000 1 (Kochy et al.)  | 76,923  | 120,000   | 0.64         | 2.1           |
|            | 2,300 3 (NASA)          | 176,923 | 360,000   | 0.49         | 2.7           |
|            | 3,000 >3 (Kochy et al.) | 230,769 | 360,000   | 0.64         | 2.1           |
|            |                         |         |           | MEAN of 4    | 2.1           |
|            |                         |         |           | MEAN 1st 3   | 2.1           |

#### Table of Terrain scenarios.

| BD gm-3 | Area Gm2    | Terrain Factor | Soil Gt | Depth m | SOC @ 1.3% |
|---------|-------------|----------------|---------|---------|------------|
| 1.35    | 120,000 x 1 | 1              | 162,000 | 1       | 2,106      |
| 1.35    | 240,000 x 2 | 2              | 324,000 | 1       | 4,212      |
| 1.35    | 480,000 x 4 | 4              | 648,000 | 1       | 8,424      |

|      |             |   |           |   |        |
|------|-------------|---|-----------|---|--------|
| 1.35 | 720,000 x 6 | 2 | 972,000   | 3 | 12,636 |
| 1.35 | 720,000 x 6 | 4 | 1,944,000 | 3 | 25,272 |

If soil weighs between 1.2- 1.7 tonnes per cubic m (<https://www.reference.com/science/much-cubi>)

| tonnes per m3 | area Gm3 | tot mass Gt | bd  | SOC @ 1.3% | For 1,500 Gt |
|---------------|----------|-------------|-----|------------|--------------|
| 1.20          | 120,000  | 144,000     | 1.2 | 1,872      | 1.2          |
| 1.70          | 120,000  | 204,000     | 1.7 | 2,652      | 1.8          |

Or bcs bd is same as mass, then if BD is the required 1.35 get...

**1.35      120,000      162,000      1.35      2,106      1.4**

Q.E.D.

What happens if I put tm-3 as gcm-3 and then use 1 m depth i.e., 1 m vs. 100 cm?

This is OK as 1 million g = 1 t and 1 million cm<sup>3</sup> = 1 m<sup>3</sup>; but only 10,000 m<sup>2</sup> = 1 ha and I measure in (

Julieta Bramowski file data and calculations of tortuosity using straight or curved hypotensuses. R.J

| 1  |         | Cateto (1cn Cateto diferen Soma catetos |   |      |       |
|----|---------|-----------------------------------------|---|------|-------|
| 1  | 26 Diff |                                         |   |      |       |
| 2  | 29      | 3.00                                    | 1 | 9.00 | 10.00 |
| 3  | 29      | 0.00                                    | 1 | 0.00 | 1.00  |
| 4  | 28      | 1.00                                    | 1 | 1.00 | 2.00  |
| 5  | 28      | 0.00                                    | 1 | 0.00 | 1.00  |
| 6  | 28      | 0.00                                    | 1 | 0.00 | 1.00  |
| 7  | 28      | 0.00                                    | 1 | 0.00 | 1.00  |
| 8  | 27      | 1.00                                    | 1 | 1.00 | 2.00  |
| 9  | 27      | 0.00                                    | 1 | 0.00 | 1.00  |
| 10 | 28      | 1.00                                    | 1 | 1.00 | 2.00  |
| 11 | 28      | 0.00                                    | 1 | 0.00 | 1.00  |
| 12 | 26      | 2.00                                    | 1 | 4.00 | 5.00  |
| 13 | 26      | 0.00                                    | 1 | 0.00 | 1.00  |
| 14 | 27      | 1.00                                    | 1 | 1.00 | 2.00  |
| 15 | 27      | 0.00                                    | 1 | 0.00 | 1.00  |
| 16 | 24      | 3.00                                    | 1 | 9.00 | 10.00 |
| 17 | 24      | 0.00                                    | 1 | 0.00 | 1.00  |
| 18 | 23      | 1.00                                    | 1 | 1.00 | 2.00  |
| 19 | 23      | 0.00                                    | 1 | 0.00 | 1.00  |
| 20 | 23      | 0.00                                    | 1 | 0.00 | 1.00  |
| 21 | 23      | 0.00                                    | 1 | 0.00 | 1.00  |
| 22 | 23      | 0.00                                    | 1 | 0.00 | 1.00  |
| 23 | 23      | 0.00                                    | 1 | 0.00 | 1.00  |
| 24 | 25      | 2.00                                    | 1 | 4.00 | 5.00  |
| 25 | 25      | 0.00                                    | 1 | 0.00 | 1.00  |
| 26 | 27      | 2.00                                    | 1 | 4.00 | 5.00  |
| 27 | 27      | 0.00                                    | 1 | 0.00 | 1.00  |
| 28 | 26      | 1.00                                    | 1 | 1.00 | 2.00  |

|    |    |      |   |       |       |
|----|----|------|---|-------|-------|
| 29 | 26 | 0.00 | 1 | 0.00  | 1.00  |
| 30 | 25 | 1.00 | 1 | 1.00  | 2.00  |
| 31 | 25 | 0.00 | 1 | 0.00  | 1.00  |
| 32 | 24 | 1.00 | 1 | 1.00  | 2.00  |
| 33 | 24 | 0.00 | 1 | 0.00  | 1.00  |
| 34 | 23 | 1.00 | 1 | 1.00  | 2.00  |
| 35 | 23 | 0.00 | 1 | 0.00  | 1.00  |
| 36 | 25 | 2.00 | 1 | 4.00  | 5.00  |
| 37 | 25 | 0.00 | 1 | 0.00  | 1.00  |
| 38 | 24 | 1.00 | 1 | 1.00  | 2.00  |
| 39 | 24 | 0.00 | 1 | 0.00  | 1.00  |
| 40 | 23 | 1.00 | 1 | 1.00  | 2.00  |
| 41 | 23 | 0.00 | 1 | 0.00  | 1.00  |
| 42 | 25 | 2.00 | 1 | 4.00  | 5.00  |
| 43 | 25 | 0.00 | 1 | 0.00  | 1.00  |
| 44 | 29 | 4.00 | 1 | 16.00 | 17.00 |
| 45 | 29 | 0.00 | 1 | 0.00  | 1.00  |
| 46 | 33 | 4.00 | 1 | 16.00 | 17.00 |
| 47 | 33 | 0.00 | 1 | 0.00  | 1.00  |
| 48 | 33 | 0.00 | 1 | 0.00  | 1.00  |
| 49 | 33 | 0.00 | 1 | 0.00  | 1.00  |
| 50 | 34 | 1.00 | 1 | 1.00  | 2.00  |
| 51 | 34 | 0.00 | 1 | 0.00  | 1.00  |
| 52 | 35 | 1.00 | 1 | 1.00  | 2.00  |
| 53 | 35 | 0.00 | 1 | 0.00  | 1.00  |
| 54 | 35 | 0.00 | 1 | 0.00  | 1.00  |
| 55 | 35 | 0.00 | 1 | 0.00  | 1.00  |
| 56 | 33 | 2.00 | 1 | 4.00  | 5.00  |
| 57 | 33 | 0.00 | 1 | 0.00  | 1.00  |
| 58 | 32 | 1.00 | 1 | 1.00  | 2.00  |
| 59 | 32 | 0.00 | 1 | 0.00  | 1.00  |
| 60 | 32 | 0.00 | 1 | 0.00  | 1.00  |
| 61 | 32 | 0.00 | 1 | 0.00  | 1.00  |
| 62 | 32 | 0.00 | 1 | 0.00  | 1.00  |
| 63 | 32 | 0.00 | 1 | 0.00  | 1.00  |
| 64 | 32 | 0.00 | 1 | 0.00  | 1.00  |
| 65 | 32 | 0.00 | 1 | 0.00  | 1.00  |
| 66 | 28 | 4.00 | 1 | 16.00 | 17.00 |
| 67 | 28 | 0.00 | 1 | 0.00  | 1.00  |
| 68 | 28 | 0.00 | 1 | 0.00  | 1.00  |
| 69 | 28 | 0.00 | 1 | 0.00  | 1.00  |
| 70 | 26 | 2.00 | 1 | 4.00  | 5.00  |
| 71 | 26 | 0.00 | 1 | 0.00  | 1.00  |
| 72 | 28 | 2.00 | 1 | 4.00  | 5.00  |
| 73 | 28 | 0.00 | 1 | 0.00  | 1.00  |
| 74 | 30 | 2.00 | 1 | 4.00  | 5.00  |
| 75 | 30 | 0.00 | 1 | 0.00  | 1.00  |
| 76 | 30 | 0.00 | 1 | 0.00  | 1.00  |
| 77 | 30 | 0.00 | 1 | 0.00  | 1.00  |
| 78 | 29 | 1.00 | 1 | 1.00  | 2.00  |

|    |    |      |   |       |       |
|----|----|------|---|-------|-------|
| 79 | 29 | 0.00 | 1 | 0.00  | 1.00  |
| 80 | 25 | 4.00 | 1 | 16.00 | 17.00 |
| 81 | 25 | 0.00 | 1 | 0.00  | 1.00  |
| 82 | 24 | 1.00 | 1 | 1.00  | 2.00  |
| 83 | 24 | 0.00 | 1 | 0.00  | 1.00  |
| 84 | 24 | 0.00 | 1 | 0.00  | 1.00  |
| 85 | 24 | 0.00 | 1 | 0.00  | 1.00  |
| 86 | 24 | 0.00 | 1 | 0.00  | 1.00  |
| 87 | 24 | 0.00 | 1 | 0.00  | 1.00  |
| 88 | 22 | 2.00 | 1 | 4.00  | 5.00  |
| 89 | 22 | 0.00 | 1 | 0.00  | 1.00  |
| 90 | 20 | 2.00 | 1 | 4.00  | 5.00  |

**T 1.416193**

\*OK, 28th July, 2017 I recalculated all Julieta's data and got these TIs for straight hypoteneuses and

| Reps | Straight    | Curved      | Ratio    |
|------|-------------|-------------|----------|
| 1    | 4.146757548 | 6.513711517 | 1.570796 |
| 2    | 1.503317816 | 2.361406101 | 1.570796 |
| 3    | 5.95607406  | 9.355779245 | 1.570796 |
| 4    | 5.0978035   | 8.007611004 | 1.570796 |
| 5    | 2.724261132 | 4.279259375 | 1.570796 |
| 6    | 4.893820386 | 7.687195078 | 1.570796 |
| 7    | 8.478098704 | 13.31736629 | 1.570796 |
| 8    | 7.794378391 | 12.24338093 | 1.570796 |
| 9    | 3.498022711 | 5.49468122  | 1.570796 |
| 10   | 1.706685434 | 2.680855208 | 1.570796 |
| 11   | 4.350964155 | 6.834478504 | 1.570796 |

|      |             |             |          |
|------|-------------|-------------|----------|
| Tot  | 50.15018384 | 78.77572447 |          |
| Mean | 4.559107622 | 7.161429497 | 1.570796 |

Mean mean 3.58

Reps Julieta's means 18th July

|   |      |
|---|------|
| 1 | 1.27 |
| 2 | 1.28 |
| 3 | 1.37 |
| 4 | 1.15 |
| 5 | 1.35 |
| 6 | 1.36 |
| 7 | 1.29 |
| 8 | 1.6  |

Tot 10.67  
Mean 1.33375

calculations and Julieta data file appended at the bottom.

r that are my calculations and additions. RJB September, 2018. Zama, Japan.

| rugged_lsd | rugged_pc | [% land_area | [100C lat | lon      | soil [% Fertile soil] |
|------------|-----------|--------------|-----------|----------|-----------------------|
| 0.144      | 0         | 18           | 12.508    | -69.97   | 21.324                |
| 0.72       | 39.004    | 65209        | 33.833    | 66.026   | 27.849                |
| 0.228      | 4.906     | 124670       | -12.299   | 17.551   | 26.676                |
| 0.006      | 0         | 9            | 18.231    | -63.064  | 100                   |
| 1.006      | 62.133    | 2740         | 41.143    | 20.07    | 68.088                |
| 1.616      | 99.064    | 47           | 42.551    | 1.576    | 0                     |
| 0.08       | 0         | 80           | 12.725    | -68.157  | 24.595                |
| 0.191      | 6.142     | 8360         | 23.913    | 54.331   | 0                     |
| 0.226      | 9.407     | 273669       | -35.396   | -65.17   | 35.678                |
| 0.799      | 50.556    | 2820         | 40.294    | 44.938   | 30.148                |
| 0.792      | 44.303    | 20           | -14.2     | -170.388 | 100                   |
| 0.003      | 0         | 44           | 17.271    | -61.8    | 100                   |
| 0.045      | 0.685     | 768230       | -25.733   | 134.487  | 14.248                |
| 1.008      | 54.307    | 8245         | 47.589    | 14.14    | 55.098                |
| 0.49       | 27.713    | 8260.5       | 40.288    | 47.528   | 60.957                |
| 0.5        | 27.519    | 2568         | -3.365    | 29.887   | 24.049                |
| 0.109      | 0.178     | 3023         | 50.642    | 4.661    | 48.967                |
| 0.045      | 0.014     | 11062        | 9.65      | 2.339    | 74.973                |
| 0.066      | 0.051     | 27360        | 12.274    | -1.747   | 56.909                |
| 0.053      | 1.817     | 13017        | 23.848    | 90.27    | 41.883                |
| 0.427      | 20.196    | 11063        | 42.765    | 25.239   | 82.101                |
| 0.063      | 0         | 71           | 26.025    | 50.565   | 0                     |
| 0.017      | 0         | 1001         | 24.255    | -76.61   | 13.924                |
| 0.665      | 40.253    | 5120         | 44.175    | 17.784   | 76.888                |
| 0.046      | 0         | 20748        | 53.542    | 28.054   | 50.611                |
| 0.174      | 6.568     | 2281         | 17.205    | -88.687  | 35.49                 |
| 0.006      | 0         | 5            | 32.31     | -64.772  | 20                    |
| 0.258      | 13.57     | 108438       | -16.71    | -64.662  | 31.807                |
| 0.076      | 0.558     | 845942       | -10.775   | -53.085  | 18.783                |
| 0.289      | 3.823     | 43           | 13.167    | -59.555  | 30.588                |
| 0.162      | 5.089     | 527          | 4.521     | 114.748  | 62.29                 |
| 1.962      | 96.475    | 4700         | 27.417    | 90.435   | 66.365                |
| 0.048      | 0.301     | 56673        | -22.189   | 23.814   | 15.249                |
| 0.06       | 0.033     | 62300        | 6.574     | 20.487   | 10.967                |
| 0.23       | 9.122     | 909351       | 61.495    | -98.334  | 16.794                |
| 0.005      | 0         | 1            | -12.122   | 96.867   | 0                     |
| 1.388      | 66.06     | 4000         | 46.806    | 8.226    | 39.341                |
| 0.731      | 38.199    | 74880        | -37.937   | -71.384  | 22.158                |
| 0.537      | 28.648    | 932748       | 36.564    | 103.836  | 22.836                |
| 0.069      | 0.493     | 31800        | 7.623     | -5.554   | 26.151                |
| 0.157      | 4.031     | 46540        | 5.697     | 12.743   | 27.829                |
| 0.126      | 2.763     | 226705       | -2.879    | 23.658   | 16.001                |
| 0.049      | 0.243     | 34150        | -0.831    | 15.246   | 4.063                 |
| 0.3        | 14.999    | 24           | -19.213   | -158.978 | 25                    |
| 0.277      | 14.366    | 110950       | 3.838     | -72.866  | 30.444                |
| 1.063      | 64.479    | 186.1        | -11.888   | 43.671   | 56.043                |
| 0.759      | 40.048    | 403          | 15.942    | -23.981  | 11.663                |

|       |        |        |         |         |        |
|-------|--------|--------|---------|---------|--------|
| 0.623 | 36.61  | 5106   | 9.969   | -84.199 | 52.082 |
| 0.153 | 6.129  | 10982  | 21.626  | -79.018 | 45.947 |
| 0.403 | 14.025 | 13.5   | -10.488 | 105.643 | 0      |
| 0.028 | 0      | 26     | 19.414  | -80.926 | 100    |
| 0.706 | 44.072 | 924    | 35.049  | 33.235  | 26.866 |
| 0.252 | 4.154  | 7727   | 49.739  | 15.334  | 88.653 |
| 0.168 | 3.001  | 34877  | 51.11   | 10.392  | 61.338 |
| 0.627 | 39.024 | 2318   | 11.735  | 42.58   | 0      |
| 0.001 | 0      | 75     | 15.427  | -61.356 | 36.405 |
| 0.054 | 0      | 4243   | 55.987  | 10.027  | 56.165 |
| 0.484 | 26.179 | 4838   | 18.895  | -70.493 | 39.479 |
| 0.14  | 4.885  | 238174 | 28.168  | 2.647   | 9.59   |
| 0.405 | 20.09  | 27684  | -1.434  | -78.77  | 44.308 |
| 0.186 | 5.764  | 99545  | 26.562  | 29.782  | 0.007  |
| 0.658 | 37.141 | 10100  | 15.365  | 38.848  | 20.146 |
| 0.057 | 0.202  | 26600  | 24.674  | -13.138 | 0      |
| 0.472 | 23.372 | 49900  | 40.231  | -3.644  | 64.134 |
| 0.035 | 0      | 4239   | 58.673  | 25.549  | 62.517 |
| 0.443 | 20.128 | 100000 | 8.622   | 39.636  | 46.128 |
| 0.092 | 0.137  | 30459  | 64.481  | 26.24   | 2.097  |
| 0.421 | 14.011 | 1827   | -17.447 | 161.988 | 98.293 |
| 0.083 | 0.786  | 1217   | -51.745 | -59.382 | 0      |
| 0.313 | 12.07  | 55010  | 46.56   | 2.551   | 59.939 |
| 0.665 | 39.927 | 140    | 62.073  | -6.885  | 0      |
| 0.423 | 17.095 | 70     | 6.674   | 157.754 | 32.857 |
| 0.07  | 0.434  | 25767  | -0.623  | 11.784  | 11.978 |
| 0.175 | 3.643  | 24269  | 54.15   | -2.901  | 48.239 |
| 1.067 | 59.17  | 6949   | 42.179  | 43.513  | 34.021 |
| 0.071 | 0.371  | 22754  | 7.963   | -1.208  | 65.738 |
| 1.728 | 100    | 1      | 36.139  | -5.348  | 0      |
| 0.213 | 3.952  | 24572  | 10.435  | -10.939 | 17.761 |
| 0.359 | 21.296 | 169    | 16.28   | -61.601 | 76.5   |
| 0.091 | 0      | 1000   | 13.447  | -15.388 | 81.699 |
| 0.123 | 0.098  | 2812   | 12.013  | -14.987 | 43.253 |
| 0.177 | 5.54   | 2805   | 1.703   | 10.335  | 6.829  |
| 0.867 | 52.841 | 12890  | 39.043  | 22.989  | 48.588 |
| 0.606 | 39.913 | 34     | 12.157  | -61.654 | 67.646 |
| 0.131 | 4.252  | 217500 | 74.728  | -41.345 | 0      |
| 0.538 | 30.85  | 10843  | 15.697  | -90.356 | 58.058 |
| 0.065 | 0.109  | 8815   | 3.93    | -53.233 | 18.394 |
| 0.215 | 1.498  | 54     | 13.44   | 144.776 | 22.222 |
| 0.089 | 0.36   | 19685  | 4.794   | -58.976 | 19.594 |
| 0.698 | 51.197 | 110    | 22.381  | 114.134 | 96.076 |
| 0.631 | 39.971 | 11189  | 14.822  | -86.6   | 55.945 |
| 0.366 | 17.588 | 5592   | 45.026  | 16.419  | 48.395 |
| 0.697 | 42.462 | 2756   | 18.936  | -72.686 | 42.05  |
| 0.098 | 0.921  | 8962   | 47.166  | 19.418  | 65.095 |
| 0.304 | 13.405 | 181157 | -2.226  | 117.277 | 43.306 |
| 0.295 | 12.824 | 297319 | 22.876  | 79.627  | 51.042 |
| 0.006 | 0      | 8      | -6.845  | 72.187  | 0      |

|       |        |        |         |          |        |
|-------|--------|--------|---------|----------|--------|
| 0.158 | 2.864  | 6889   | 53.181  | -8.153   | 59.095 |
| 0.651 | 33.616 | 162855 | 32.56   | 54.305   | 21.824 |
| 0.175 | 5.572  | 43737  | 33.051  | 43.765   | 7.912  |
| 0.435 | 20.729 | 10025  | 64.99   | -18.594  | 3.403  |
| 0.439 | 23.277 | 2164   | 31.353  | 34.967   | 27.477 |
| 0.711 | 38.884 | 29411  | 42.789  | 12.075   | 51.78  |
| 0.528 | 24.278 | 1083   | 18.156  | -77.311  | 66.97  |
| 0.282 | 12.165 | 8824   | 31.25   | 36.788   | 15.479 |
| 0.604 | 37.173 | 36450  | 37.54   | 137.963  | 42.879 |
| 0.108 | 2.913  | 269970 | 48.18   | 67.313   | 9.877  |
| 0.195 | 5.427  | 56914  | 0.534   | 37.861   | 33.657 |
| 1.246 | 69.767 | 19180  | 41.464  | 74.556   | 12.534 |
| 0.154 | 6.094  | 17652  | 12.707  | 104.921  | 22.213 |
| 0.003 | 0      | 81     | 0.699   | -46.958  | 45.679 |
| 0.003 | 0      | 26     | 17.274  | -62.704  | 100    |
| 0.546 | 33.976 | 9873   | 36.356  | 127.806  | 43.556 |
| 0.063 | 0      | 1782   | 29.354  | 47.613   | 0      |
| 0.723 | 49.807 | 23080  | 18.495  | 103.774  | 12.068 |
| 1.103 | 71.642 | 1023   | 33.922  | 35.897   | 72.415 |
| 0.083 | 0.459  | 9632   | 6.448   | -9.307   | 15.82  |
| 0.105 | 1.535  | 175954 | 27.041  | 18.029   | 2.756  |
| 0.59  | 35.476 | 61     | 13.894  | -60.965  | 32.527 |
| 1.554 | 76.379 | 16     | 47.145  | 9.554    | 0      |
| 0.197 | 7.786  | 6463   | 7.63    | 80.701   | 51.595 |
| 1.559 | 90.249 | 3035   | -29.58  | 28.254   | 54.695 |
| 0.049 | 0      | 6268   | 55.336  | 23.905   | 62.064 |
| 0.242 | 1.654  | 259    | 49.778  | 6.095    | 25.662 |
| 0.044 | 0      | 6205   | 56.854  | 24.931   | 77.568 |
| 0.185 | 4.168  | 3      | 22.169  | 113.555  | 0      |
| 0.629 | 36.083 | 44630  | 31.882  | -6.302   | 43.968 |
| 2.106 | 100    | 0      | 43.753  | 7.422    | 0      |
| 0.222 | 0.403  | 3288   | 47.205  | 28.468   | 62.015 |
| 0.328 | 12.672 | 58154  | -19.379 | 46.7     | 50.804 |
| 0.004 | 0      | 30     | 3.566   | 73.215   | 30     |
| 0.491 | 27.341 | 194395 | 23.941  | -102.536 | 31.934 |
| 0.004 | 0      | 18     | 8.027   | 169.168  | 50     |
| 0.783 | 49.405 | 2543   | 41.6    | 21.701   | 52.895 |
| 0.042 | 0.228  | 122019 | 17.355  | -3.524   | 18.562 |
| 0.381 | 14.699 | 32     | 35.925  | 14.407   | 100    |
| 0.577 | 34.731 | 65755  | 21.123  | 96.514   | 25.529 |
| 0.309 | 12.623 | 156650 | 46.836  | 103.07   | 44.883 |
| 0.504 | 25.44  | 46     | 15.8    | 145.63   | 4.13   |
| 0.17  | 4.54   | 78638  | -17.264 | 35.549   | 55.384 |
| 0.034 | 0.278  | 103070 | 20.264  | -10.336  | 2.042  |
| 1.027 | 69.921 | 10     | 16.736  | -62.193  | 0      |
| 0.378 | 11.619 | 106    | 14.649  | -61.021  | 61.658 |
| 0.283 | 9.101  | 203    | -20.131 | 57.879   | 52.217 |
| 0.3   | 10.542 | 9408   | -13.216 | 34.301   | 32.281 |
| 0.316 | 12.87  | 32855  | 3.791   | 109.709  | 49.196 |
| 0.72  | 42.602 | 37.4   | -12.82  | 45.143   | 50.771 |

|       |        |         |         |          |        |
|-------|--------|---------|---------|----------|--------|
| 0.235 | 9.723  | 82329   | -22.14  | 17.219   | 25.173 |
| 0.492 | 24.913 | 1828    | -21.299 | 165.663  | 54.444 |
| 0.051 | 0.245  | 126670  | 17.424  | 9.401    | 8.236  |
| 0.351 | 12.248 | 4       | -29.027 | 167.956  | 0      |
| 0.093 | 1.563  | 91077   | 9.585   | 8.092    | 56.263 |
| 0.286 | 11.923 | 12140   | 12.841  | -85.033  | 33.249 |
| 0.055 | 0      | 26      | -19.05  | -169.86  | 26.923 |
| 0.012 | 0      | 3388    | 52.25   | 5.621    | 41.165 |
| 0.692 | 37.013 | 30428   | 64.467  | 14.082   | 0.073  |
| 1.493 | 75.265 | 14300   | 28.264  | 83.931   | 41.622 |
| 0.089 | 0      | 2       | -0.641  | 167.801  | 0      |
| 0.606 | 31.49  | 26771   | -41.806 | 171.478  | 44.643 |
| 0.283 | 12.216 | 30950   | 20.595  | 56.104   | 0      |
| 0.559 | 25.078 | 77088   | 29.97   | 69.395   | 6.988  |
| 0.457 | 22.956 | 7443    | 8.513   | -80.109  | 42.843 |
| 0.104 | 7.424  | 4.7     | -24.431 | -128.445 | 0      |
| 0.427 | 20.01  | 128000  | -9.173  | -74.361  | 21.743 |
| 0.583 | 34.183 | 29817   | 11.739  | 122.868  | 80.137 |
| 0.148 | 0      | 46      | 7.801   | 135.16   | 13.043 |
| 0.491 | 25.222 | 45286   | -6.476  | 145.252  | 46.833 |
| 0.084 | 1.2    | 30436   | 52.124  | 19.401   | 48.41  |
| 0.416 | 19.25  | 887     | 18.225  | -66.464  | 59.186 |
| 0.71  | 52.428 | 12041   | 40.143  | 127.174  | 24.281 |
| 0.369 | 15.522 | 9150    | 39.593  | -8.531   | 34.264 |
| 0.067 | 0.224  | 39730   | -23.245 | -58.393  | 28.751 |
| 0.706 | 54.906 | 602     | 31.914  | 35.207   | 62.369 |
| 0.645 | 40.29  | 366     | -15.346 | -145.232 | 6.284  |
| 0.047 | 0      | 1100    | 25.293  | 51.199   | 0      |
| 1.208 | 67.425 | 250     | -21.121 | 55.54    | 16.4   |
| 0.357 | 16.71  | 22971   | 45.843  | 24.986   | 69.642 |
| 0.267 | 11.412 | 1638134 | 61.99   | 96.711   | 17.718 |
| 0.855 | 64.627 | 2467    | -2.003  | 29.923   | 42.97  |
| 0.231 | 8.891  | 214969  | 24.097  | 44.562   | 0      |
| 0.48  | 27.128 | 10200   | 43.866  | 20.599   | 67.976 |
| 0.116 | 2.891  | 237600  | 13.887  | 30.09    | 19.8   |
| 0.065 | 0.168  | 19253   | 14.361  | -14.474  | 60.496 |
| 0.005 | 0      | 67      | 1.361   | 103.82   | 3.488  |
| 1.205 | 72.252 | 39      | -25.656 | -10.466  | 10.256 |
| 0.464 | 24.247 | 0       | 78.845  | 18.31    | 0      |
| 0.476 | 21.213 | 2799    | -8.895  | 159.601  | 80.002 |
| 0.144 | 1.943  | 7162    | 8.561   | -11.791  | 7.546  |
| 0.518 | 26.108 | 2072    | 13.724  | -88.869  | 65.938 |
| 0.522 | 14.144 | 6       | 43.944  | 12.459   | 0      |
| 0.17  | 6.914  | 62734   | 6.061   | 45.867   | 7.535  |
| 0.247 | 2.892  | 23      | 46.936  | -56.323  | 0      |
| 0.71  | 42.127 | 96      | 0.446   | 6.727    | 88.013 |
| 0.096 | 0.743  | 15600   | 4.133   | -55.911  | 22.425 |
| 0.442 | 23.419 | 4810    | 48.707  | 19.487   | 60.924 |
| 0.711 | 39.108 | 2014    | 46.112  | 14.823   | 67.604 |
| 0.207 | 3.868  | 41033   | 62.777  | 16.759   | 15.853 |



|       |        |        |         |          |        |
|-------|--------|--------|---------|----------|--------|
| 0.775 | 54.481 | 1720   | -26.565 | 31.501   | 54.413 |
| 1.278 | 54.101 | 46     | -6.723  | 51.924   | 13.043 |
| 0.198 | 6.63   | 18378  | 35.014  | 38.498   | 52.909 |
| 0.003 | 0      | 43     | 21.75   | -71.856  | 0      |
| 0.112 | 3.605  | 125920 | 15.365  | 18.667   | 19.262 |
| 0.088 | 0.981  | 5439   | 8.528   | 0.977    | 56.646 |
| 0.302 | 16.408 | 51089  | 15.107  | 101.018  | 20.144 |
| 1.54  | 75.473 | 13996  | 38.527  | 71.038   | 17.449 |
| 0     | 0      | 1      | -9.088  | -171.83  | 0      |
| 0.082 | 1.426  | 46993  | 39.194  | 59.178   | 3.97   |
| 0.584 | 28.298 | 1487   | -8.827  | 125.858  | 64.979 |
| 0.224 | 9.737  | 72     | -19.859 | -174.847 | 100    |
| 0.184 | 5.099  | 513    | 10.469  | -61.257  | 50.384 |
| 0.198 | 7.434  | 15536  | 34.12   | 9.579    | 31.727 |
| 0.732 | 40.909 | 76963  | 39.061  | 35.174   | 65.295 |
| 0.008 | 0      | 3      | -7.414  | 178.052  | 66.667 |
| 1.032 | 56.543 | 3615   | 23.752  | 120.953  | 9.843  |
| 0.201 | 5.346  | 88580  | -6.266  | 34.826   | 39.711 |
| 0.251 | 8.765  | 19710  | 1.282   | 32.388   | 13.095 |
| 0.117 | 1.988  | 57935  | 49.009  | 31.411   | 69.003 |
| 0.001 | 0      | 0      | 7.141   | -153.655 | 0      |
| 0.114 | 0.136  | 17502  | -32.802 | -56.013  | 68.979 |
| 0.304 | 14.317 | 916192 | 45.718  | -112.982 | 41.6   |
| 0.154 | 5.782  | 42540  | 41.633  | 63.341   | 11.72  |
| 0.126 | 0      | 0      | 41.904  | 12.451   | 100    |
| 0.892 | 61.286 | 39     | 13.185  | -61.205  | 38.818 |
| 0.202 | 5.994  | 88205  | 7.132   | -66.153  | 21.567 |
| 0.34  | 19.147 | 15     | 18.511  | -64.518  | 100    |
| 0.395 | 17.088 | 35     | 17.985  | -64.805  | 100    |
| 0.583 | 36.775 | 31106  | 16.643  | 106.306  | 12.15  |
| 0.545 | 24.993 | 1219   | -16.196 | 167.703  | 79.892 |
| 0.4   | 24.238 | 14     | -13.829 | -177.194 | 42.857 |
| 0.549 | 22.244 | 283    | -13.738 | -172.168 | 100    |
| 0.591 | 33.06  | 52797  | 15.863  | 47.58    | 0      |
| 0.45  | 23.957 | 121447 | -29.004 | 25.094   | 27.647 |
| 0.145 | 2.455  | 74339  | -13.458 | 27.794   | 23.114 |
| 0.306 | 13.837 | 38685  | -19     | 29.869   | 54.877 |

|            |           |            |     |          |           |
|------------|-----------|------------|-----|----------|-----------|
| rugged_lsd | rugged_pc | land_area  | lat | lon      | soil      |
| %          |           | 13,193,676 |     |          | 36.70     |
|            |           | 1,000 ha   |     | Tot area | 4,842,079 |

lope (%). As another alternative ruggedness measure, using the same GTOPO30 elevation data, we calculate (height)/run (base) **% Fertile soil.** On t

4m per meter or rise of 4 cm giving extra hypoteneuse (area) by about 0.08%

% has 4 cm rise per metre and the hypoteneuse is just extra 0.08 cm, or the extra 0.08%.

add to the land area is 0.08%!!!

10 arc-seconds = ca. 1 km so is probably underestimation of undulations in each km.

out 6.3%

5.3 cm per metre with hypotenuse just an extra 0.2 cm or 0.2%.

all countries area by their % slope as it is expressed in the actual increase in hypoteneuse %....

| rugged_lsd | rugged_pc | land_area | area x (slope/10C Tot area |             | % Diff      |
|------------|-----------|-----------|----------------------------|-------------|-------------|
| 0.144      | 0         | 18        | 0.22068                    | 18.22068    | 1.211151285 |
| 0.72       | 39.004    | 65209     | 4834.59526                 | 70043.59526 | 6.902265999 |
| 0.228      | 4.906     | 124670    | 2834.9958                  | 127504.9958 | 2.223438997 |
| 0.006      | 0         | 9         | 0.00234                    | 9.00234     | 0.025993242 |
| 1.006      | 62.133    | 2740      | 286.3574                   | 3026.3574   | 9.462114422 |
| 1.616      | 99.064    | 47        | 8.35378                    | 55.35378    | 15.09161615 |
| 0.08       | 0         | 80        | 0.544                      | 80.544      | 0.675407231 |
| 0.191      | 6.142     | 8360      | 176.5632                   | 8536.5632   | 2.068317142 |
| 0.226      | 9.407     | 273669    | 6206.81292                 | 279875.8129 | 2.217702507 |
| 0.799      | 50.556    | 2820      | 230.6196                   | 3050.6196   | 7.559762613 |
| 0.792      | 44.303    | 20        | 1.4064                     | 21.4064     | 6.569997758 |
| 0.003      | 0         | 44        | 0.00528                    | 44.00528    | 0.01199856  |
| 0.045      | 0.685     | 768230    | 3111.3315                  | 771341.3315 | 0.403366366 |
| 1.008      | 54.307    | 8245      | 914.78275                  | 9159.78275  | 9.986948107 |
| 0.49       | 27.713    | 8260.5    | 419.6334                   | 8680.1334   | 4.834411877 |
| 0.5        | 27.519    | 2568      | 121.23528                  | 2689.23528  | 4.508169326 |
| 0.109      | 0.178     | 3023      | 37.45497                   | 3060.45497  | 1.223836664 |
| 0.045      | 0.014     | 11062     | 41.70374                   | 11103.70374 | 0.375584048 |
| 0.066      | 0.051     | 27360     | 174.5568                   | 27534.5568  | 0.633955365 |
| 0.053      | 1.817     | 13017     | 65.34534                   | 13082.34534 | 0.499492547 |
| 0.427      | 20.196    | 11063     | 497.61374                  | 11560.61374 | 4.304388601 |
| 0.063      | 0         | 71        | 0.44517                    | 71.44517    | 0.623093206 |
| 0.017      | 0         | 1001      | 1.44144                    | 1002.44144  | 0.143792938 |
| 0.665      | 40.253    | 5120      | 362.24                     | 5482.24     | 6.607518095 |
| 0.046      | 0         | 20748     | 112.0392                   | 20860.0392  | 0.537099662 |
| 0.174      | 6.568     | 2281      | 36.86096                   | 2317.86096  | 1.59030074  |
| 0.006      | 0         | 5         | 0.0015                     | 5.0015      | 0.029991003 |
| 0.258      | 13.57     | 108438    | 2540.70234                 | 110978.7023 | 2.289360288 |
| 0.076      | 0.558     | 845942    | 5532.46068                 | 851474.4607 | 0.649750631 |
| 0.289      | 3.823     | 43        | 1.10983                    | 44.10983    | 2.516060479 |
| 0.162      | 5.089     | 527       | 7.19882                    | 534.19882   | 1.347591895 |
| 1.962      | 96.475    | 4700      | 908.275                    | 5608.275    | 16.19526503 |
| 0.048      | 0.301     | 56673     | 276.56424                  | 56949.56424 | 0.485630125 |
| 0.06       | 0.033     | 62300     | 328.944                    | 62628.944   | 0.525226802 |
| 0.23       | 9.122     | 909351    | 24507.00945                | 933858.0095 | 2.624275768 |
| 0.005      | 0         | 1         | 0.00031                    | 1.00031     | 0.030990393 |
| 1.388      | 66.06     | 4000      | 599.96                     | 4599.96     | 13.04272211 |
| 0.731      | 38.199    | 74880     | 5514.912                   | 80394.912   | 6.859777395 |
| 0.537      | 28.648    | 932748    | 51235.84764                | 983983.8476 | 5.206980558 |
| 0.069      | 0.493     | 31800     | 188.892                    | 31988.892   | 0.590492475 |
| 0.157      | 4.031     | 46540     | 639.4596                   | 47179.4596  | 1.355377118 |
| 0.126      | 2.763     | 226705    | 2668.31785                 | 229373.3179 | 1.163307866 |
| 0.049      | 0.243     | 34150     | 138.649                    | 34288.649   | 0.404358305 |
| 0.3        | 14.999    | 24        | 0.63384                    | 24.63384    | 2.573045859 |
| 0.277      | 14.366    | 110950    | 2636.172                   | 113586.172  | 2.320856451 |
| 1.063      | 64.479    | 186.1     | 16.840189                  | 202.940189  | 8.298104522 |
| 0.759      | 40.048    | 403       | 26.20306                   | 429.20306   | 6.10504967  |
| 0.623      | 36.61     | 5106      | 291.45048                  | 5397.45048  | 5.399780527 |

|       |        |        |            |             |             |
|-------|--------|--------|------------|-------------|-------------|
| 0.153 | 6.129  | 10982  | 159.01936  | 11141.01936 | 1.427332229 |
| 0.403 | 14.025 | 13.5   | 0.469395   | 13.969395   | 3.360166994 |
| 0.028 | 0      | 26     | 0.06162    | 26.06162    | 0.236439638 |
| 0.706 | 44.072 | 924    | 72.69108   | 996.69108   | 7.29324075  |
| 0.252 | 4.154  | 7727   | 219.83315  | 7946.83315  | 2.766298799 |
| 0.168 | 3.001  | 34877  | 664.75562  | 35541.75562 | 1.870351108 |
| 0.627 | 39.024 | 2318   | 148.72288  | 2466.72288  | 6.029168546 |
| 0.001 | 0      | 75     | 0.00375    | 75.00375    | 0.00499975  |
| 0.054 | 0      | 4243   | 25.92473   | 4268.92473  | 0.607289461 |
| 0.484 | 26.179 | 4838   | 217.4681   | 5055.4681   | 4.301641227 |
| 0.14  | 4.885  | 238174 | 3441.6143  | 241615.6143 | 1.424417172 |
| 0.405 | 20.09  | 27684  | 953.99064  | 28637.99064 | 3.33120662  |
| 0.186 | 5.764  | 99545  | 1991.89545 | 101536.8955 | 1.961745473 |
| 0.658 | 37.141 | 10100  | 672.963    | 10772.963   | 6.246777233 |
| 0.057 | 0.202  | 26600  | 150.29     | 26750.29    | 0.561825685 |
| 0.472 | 23.372 | 49900  | 2525.938   | 52425.938   | 4.818107403 |
| 0.035 | 0      | 4239   | 17.54946   | 4256.54946  | 0.412293107 |
| 0.443 | 20.128 | 100000 | 4193       | 104193      | 4.024262666 |
| 0.092 | 0.137  | 30459  | 366.11718  | 30825.11718 | 1.187723563 |
| 0.421 | 14.011 | 1827   | 68.01921   | 1895.01921  | 3.589367835 |
| 0.083 | 0.786  | 1217   | 10.45403   | 1227.45403  | 0.851684034 |
| 0.313 | 12.07  | 55010  | 1873.6406  | 56883.6406  | 3.293812738 |
| 0.665 | 39.927 | 140    | 11.501     | 151.501     | 7.591369034 |
| 0.423 | 17.095 | 70     | 2.527      | 72.527      | 3.48421967  |
| 0.07  | 0.434  | 25767  | 150.22161  | 25917.22161 | 0.579620811 |
| 0.175 | 3.643  | 24269  | 455.77182  | 24724.77182 | 1.843381299 |
| 1.067 | 59.17  | 6949   | 782.31842  | 7731.31842  | 10.11882292 |
| 0.071 | 0.371  | 22754  | 136.75154  | 22890.75154 | 0.597409568 |
| 1.728 | 100    | 1      | 0.21453    | 1.21453     | 17.66362297 |
| 0.213 | 3.952  | 24572  | 483.82268  | 25055.82268 | 1.930979023 |
| 0.359 | 21.296 | 169    | 5.4587     | 174.4587    | 3.128935387 |
| 0.091 | 0      | 1000   | 9.15       | 1009.15     | 0.906703661 |
| 0.123 | 0.098  | 2812   | 36.61224   | 2848.61224  | 1.285265839 |
| 0.177 | 5.54   | 2805   | 40.64445   | 2845.64445  | 1.428303877 |
| 0.867 | 52.841 | 12890  | 1181.4974  | 14071.4974  | 8.396387154 |
| 0.606 | 39.913 | 34     | 1.9227     | 35.9227     | 5.352325967 |
| 0.131 | 4.252  | 217500 | 3366.9     | 220866.9    | 1.524402253 |
| 0.538 | 30.85  | 10843  | 530.54799  | 11373.54799 | 4.664753606 |
| 0.065 | 0.109  | 8815   | 48.1299    | 8863.1299   | 0.543035029 |
| 0.215 | 1.498  | 54     | 0.9855     | 54.9855     | 1.792290695 |
| 0.089 | 0.36   | 19685  | 146.4564   | 19831.4564  | 0.738505519 |
| 0.698 | 51.197 | 110    | 7.3612     | 117.3612    | 6.272260338 |
| 0.631 | 39.971 | 11189  | 651.64736  | 11840.64736 | 5.503477472 |
| 0.366 | 17.588 | 5592   | 214.84464  | 5806.84464  | 3.699851698 |
| 0.697 | 42.462 | 2756   | 177.70688  | 2933.70688  | 6.057417706 |
| 0.098 | 0.921  | 8962   | 97.6858    | 9059.6858   | 1.078247107 |
| 0.304 | 13.405 | 181157 | 4686.53159 | 185843.5316 | 2.521762017 |
| 0.295 | 12.824 | 297319 | 8449.80598 | 305768.806  | 2.763462399 |
| 0.006 | 0      | 8      | 0.00296    | 8.00296     | 0.036986315 |
| 0.158 | 2.864  | 6889   | 115.45964  | 7004.45964  | 1.648373264 |

|       |        |        |            |             |             |
|-------|--------|--------|------------|-------------|-------------|
| 0.651 | 33.616 | 162855 | 11337.9651 | 174192.9651 | 6.508853612 |
| 0.175 | 5.572  | 43737  | 839.31303  | 44576.31303 | 1.882867768 |
| 0.435 | 20.729 | 10025  | 533.1295   | 10558.1295  | 5.049469227 |
| 0.439 | 23.277 | 2164   | 104.04512  | 2268.04512  | 4.587436074 |
| 0.711 | 38.884 | 29411  | 2207.58966 | 31618.58966 | 6.981935892 |
| 0.528 | 24.278 | 1083   | 52.38471   | 1135.38471  | 4.613829087 |
| 0.282 | 12.165 | 8824   | 274.8676   | 9098.8676   | 3.020898996 |
| 0.604 | 37.173 | 36450  | 2287.2375  | 38737.2375  | 5.90449306  |
| 0.108 | 2.913  | 269970 | 3164.0484  | 273134.0484 | 1.158423279 |
| 0.195 | 5.427  | 56914  | 1013.63834 | 57927.63834 | 1.749835431 |
| 1.246 | 69.767 | 19180  | 2513.539   | 21693.539   | 11.58657884 |
| 0.154 | 6.094  | 17652  | 250.83492  | 17902.83492 | 1.401090504 |
| 0.003 | 0      | 81     | 0.01701    | 81.01701    | 0.020995591 |
| 0.003 | 0      | 26     | 0.00312    | 26.00312    | 0.01199856  |
| 0.546 | 33.976 | 9873   | 573.32511  | 10446.32511 | 5.488294725 |
| 0.063 | 0      | 1782   | 12.31362   | 1794.31362  | 0.686257958 |
| 0.723 | 49.807 | 23080  | 1610.0608  | 24690.0608  | 6.521088842 |
| 1.103 | 71.642 | 1023   | 123.18966  | 1146.18966  | 10.74775531 |
| 0.083 | 0.459  | 9632   | 66.9424    | 9698.9424   | 0.690203089 |
| 0.105 | 1.535  | 175954 | 1977.72296 | 177931.723  | 1.111506665 |
| 0.59  | 35.476 | 61     | 3.56301    | 64.56301    | 5.518655342 |
| 1.554 | 76.379 | 16     | 2.7488     | 18.7488     | 14.66120498 |
| 0.197 | 7.786  | 6463   | 110.64656  | 6573.64656  | 1.683183892 |
| 1.559 | 90.249 | 3035   | 534.00825  | 3569.00825  | 14.96237085 |
| 0.049 | 0      | 6268   | 36.22904   | 6304.22904  | 0.574678359 |
| 0.242 | 1.654  | 259    | 7.36596    | 266.36596   | 2.765353351 |
| 0.044 | 0      | 6205   | 32.3901    | 6237.3901   | 0.51928931  |
| 0.185 | 4.168  | 3      | 0.05763    | 3.05763     | 1.884793124 |
| 0.629 | 36.083 | 44630  | 3058.4939  | 47688.4939  | 6.413483945 |
| 2.106 | 100    | 0      | 0          | 0           | 0           |
| 0.222 | 0.403  | 3288   | 83.08776   | 3371.08776  | 2.464716611 |
| 0.328 | 12.672 | 58154  | 1852.2049  | 60006.2049  | 3.086688957 |
| 0.004 | 0      | 30     | 0.0072     | 30.0072     | 0.023994241 |
| 0.491 | 27.341 | 194395 | 9321.24025 | 203716.2403 | 4.575599981 |
| 0.004 | 0      | 18     | 0.00594    | 18.00594    | 0.032989114 |
| 0.783 | 49.405 | 2543   | 208.2717   | 2751.2717   | 7.570015713 |
| 0.042 | 0.228  | 122019 | 479.53467  | 122498.5347 | 0.391461556 |
| 0.381 | 14.699 | 32     | 1.37344    | 33.37344    | 4.115368389 |
| 0.577 | 34.731 | 65755  | 3627.70335 | 69382.70335 | 5.228541372 |
| 0.309 | 12.623 | 156650 | 5250.908   | 161900.908  | 3.243285084 |
| 0.504 | 25.44  | 46     | 2.10312    | 48.10312    | 4.372107256 |
| 0.17  | 4.54   | 78638  | 1299.88614 | 79937.88614 | 1.626120233 |
| 0.034 | 0.278  | 103070 | 317.4556   | 103387.4556 | 0.307054273 |
| 1.027 | 69.921 | 10     | 0.9256     | 10.9256     | 8.47184594  |
| 0.378 | 11.619 | 106    | 3.50966    | 109.50966   | 3.204886217 |
| 0.283 | 9.101  | 203    | 4.94508    | 207.94508   | 2.37807021  |
| 0.3   | 10.542 | 9408   | 259.56672  | 9667.56672  | 2.684922975 |
| 0.316 | 12.87  | 32855  | 881.8282   | 33736.8282  | 2.613844416 |
| 0.72  | 42.602 | 37.4   | 2.172566   | 39.572566   | 5.490081184 |
| 0.235 | 9.723  | 82329  | 2049.16881 | 84378.16881 | 2.428553308 |

|       |        |         |             |             |             |
|-------|--------|---------|-------------|-------------|-------------|
| 0.492 | 24.913 | 1828    | 79.29864    | 1907.29864  | 4.157641511 |
| 0.051 | 0.245  | 126670  | 609.2827    | 127279.2827 | 0.478697465 |
| 0.351 | 12.248 | 4       | 0.13064     | 4.13064     | 3.162706021 |
| 0.093 | 1.563  | 91077   | 758.67141   | 91835.67141 | 0.826118433 |
| 0.286 | 11.923 | 12140   | 324.2594    | 12464.2594  | 2.601513572 |
| 0.055 | 0      | 26      | 0.12272     | 26.12272    | 0.469782626 |
| 0.012 | 0      | 3388    | 3.65904     | 3391.65904  | 0.107883486 |
| 0.692 | 37.013 | 30428   | 2591.24848  | 33019.24848 | 7.847690663 |
| 1.493 | 75.265 | 14300   | 2067.494    | 16367.494   | 12.6317077  |
| 0.089 | 0      | 2       | 0.01562     | 2.01562     | 0.774947659 |
| 0.606 | 31.49  | 26771   | 1668.63643  | 28439.63643 | 5.867291708 |
| 0.283 | 12.216 | 30950   | 932.214     | 31882.214   | 2.923931192 |
| 0.559 | 25.078 | 77088   | 4367.0352   | 81455.0352  | 5.361283301 |
| 0.457 | 22.956 | 7443    | 307.24704   | 7750.24704  | 3.964351567 |
| 0.104 | 7.424  | 4.7     | 0.050149    | 4.750149    | 1.055735304 |
| 0.427 | 20.01  | 128000  | 4675.84     | 132675.84   | 3.524258825 |
| 0.583 | 34.183 | 29817   | 1618.46676  | 31435.46676 | 5.14853739  |
| 0.148 | 0      | 46      | 0.59478     | 46.59478    | 1.276494921 |
| 0.491 | 25.222 | 45286   | 1909.71062  | 47195.71062 | 4.046364797 |
| 0.084 | 1.2    | 30436   | 289.44636   | 30725.44636 | 0.942041188 |
| 0.416 | 19.25  | 887     | 34.84136    | 921.84136   | 3.779539681 |
| 0.71  | 52.428 | 12041   | 924.86921   | 12965.86921 | 7.133106119 |
| 0.369 | 15.522 | 9150    | 360.2355    | 9510.2355   | 3.787871499 |
| 0.067 | 0.224  | 39730   | 270.5613    | 40000.5613  | 0.676393759 |
| 0.706 | 54.906 | 602     | 47.72054    | 649.72054   | 7.344779342 |
| 0.645 | 40.29  | 366     | 20.63142    | 386.63142   | 5.336198491 |
| 0.047 | 0      | 1100    | 5.423       | 1105.423    | 0.490581434 |
| 1.208 | 67.425 | 250     | 26.6425     | 276.6425    | 9.63066051  |
| 0.357 | 16.71  | 22971   | 919.98855   | 23890.98855 | 3.850776405 |
| 0.267 | 11.412 | 1638134 | 53698.03252 | 1691832.033 | 3.173957668 |
| 0.855 | 64.627 | 2467    | 215.81316   | 2682.81316  | 8.044285872 |
| 0.231 | 8.891  | 214969  | 5404.32066  | 220373.3207 | 2.452347972 |
| 0.48  | 27.128 | 10200   | 524.688     | 10724.688   | 4.892338127 |
| 0.116 | 2.891  | 237600  | 2817.936    | 240417.936  | 1.172098907 |
| 0.065 | 0.168  | 19253   | 124.56691   | 19377.56691 | 0.64284082  |
| 0.005 | 0      | 67      | 0.02412     | 67.02412    | 0.035987045 |
| 1.205 | 72.252 | 39      | 4.36098     | 43.36098    | 10.05738339 |
| 0.464 | 24.247 | 0       | 0           | 0           | 0           |
| 0.476 | 21.213 | 2799    | 115.06689   | 2914.06689  | 3.948670169 |
| 0.144 | 1.943  | 7162    | 94.32354    | 7256.32354  | 1.299880573 |
| 0.518 | 26.108 | 2072    | 98.33712    | 2170.33712  | 4.530960609 |
| 0.522 | 14.144 | 6       | 0.32982     | 6.32982     | 5.210574708 |
| 0.17  | 6.914  | 62734   | 1073.37874  | 63807.37874 | 1.682217263 |
| 0.247 | 2.892  | 23      | 0.56741     | 23.56741    | 2.407604399 |
| 0.71  | 42.127 | 96      | 5.75136     | 101.75136   | 5.65236671  |
| 0.096 | 0.743  | 15600   | 127.14      | 15727.14    | 0.808411447 |
| 0.442 | 23.419 | 4810    | 242.5683    | 5052.5683   | 4.800891064 |
| 0.711 | 39.108 | 2014    | 155.33982   | 2169.33982  | 7.160695552 |
| 0.207 | 3.868  | 41033   | 1038.1349   | 42071.1349  | 2.467570467 |
| 0.775 | 54.481 | 1720    | 147.4728    | 1867.4728   | 7.896918231 |

|       |        |        |             |             |             |
|-------|--------|--------|-------------|-------------|-------------|
| 1.278 | 54.101 | 46     | 5.11934     | 51.11934    | 10.01448767 |
| 0.198 | 6.63   | 18378  | 399.53772   | 18777.53772 | 2.12774287  |
| 0.003 | 0      | 43     | 0.00559     | 43.00559    | 0.01299831  |
| 0.112 | 3.605  | 125920 | 1429.192    | 127349.192  | 1.122262323 |
| 0.088 | 0.981  | 5439   | 40.52055    | 5479.52055  | 0.739490794 |
| 0.302 | 16.408 | 51089  | 1443.77514  | 52532.77514 | 2.748332134 |
| 1.54  | 75.473 | 13996  | 2236.00096  | 16232.00096 | 13.77526385 |
| 0     | 0      | 1      | 0           | 1           | 0           |
| 0.082 | 1.426  | 46993  | 391.92162   | 47384.92162 | 0.82710197  |
| 0.584 | 28.298 | 1487   | 74.36487    | 1561.36487  | 4.762811783 |
| 0.224 | 9.737  | 72     | 1.43424     | 73.43424    | 1.95309436  |
| 0.184 | 5.099  | 513    | 8.26443     | 521.26443   | 1.585458267 |
| 0.198 | 7.434  | 15536  | 322.99344   | 15858.99344 | 2.036657883 |
| 0.732 | 40.909 | 76963  | 5982.33399  | 82945.33399 | 7.21238158  |
| 0.008 | 0      | 3      | 0.00165     | 3.00165     | 0.054969767 |
| 1.032 | 56.543 | 3615   | 353.72775   | 3968.72775  | 8.912875165 |
| 0.201 | 5.346  | 88580  | 1606.8412   | 90186.8412  | 1.781680319 |
| 0.251 | 8.765  | 19710  | 477.7704    | 20187.7704  | 2.36663282  |
| 0.117 | 1.988  | 57935  | 763.00395   | 58698.00395 | 1.299880573 |
| 0.001 | 0      | 0      | 0           | 0           | 0           |
| 0.114 | 0.136  | 17502  | 224.55066   | 17726.55066 | 1.266747628 |
| 0.304 | 14.317 | 916192 | 31003.93728 | 947195.9373 | 3.273233769 |
| 0.154 | 5.782  | 42540  | 675.9606    | 43215.9606  | 1.564145724 |
| 0.126 | 0      | 0      | 0           | 0           | 0           |
| 0.892 | 61.286 | 39     | 3.27639     | 42.27639    | 7.749928506 |
| 0.202 | 5.994  | 88205  | 1513.5978   | 89718.5978  | 1.687050218 |
| 0.34  | 19.147 | 15     | 0.46965     | 15.46965    | 3.035944575 |
| 0.395 | 17.088 | 35     | 1.2782      | 36.2782     | 3.523328059 |
| 0.583 | 36.775 | 31106  | 1742.86918  | 32848.86918 | 5.305720481 |
| 0.545 | 24.993 | 1219   | 57.40271    | 1276.40271  | 4.497225644 |
| 0.4   | 24.238 | 14     | 0.4907      | 14.4907     | 3.38630984  |
| 0.549 | 22.244 | 283    | 13.14252    | 296.14252   | 4.43790375  |
| 0.591 | 33.06  | 52797  | 3249.65535  | 56046.65535 | 5.798125383 |
| 0.45  | 23.957 | 121447 | 6001.91074  | 127448.9107 | 4.709267977 |
| 0.145 | 2.455  | 74339  | 1057.10058  | 75396.10058 | 1.402062669 |
| 0.306 | 13.837 | 38685  | 1250.2992   | 39935.2992  | 3.130812151 |

|            |           |            |         |            |        |
|------------|-----------|------------|---------|------------|--------|
| rugged_lsd | rugged_pc | land_area  |         | Tot area   | Mean   |
| %          |           | 13,193,676 | 369,512 | 13,563,189 | 3.55   |
|            |           | 1,000 ha   |         | 2.72       | Diff % |

4 and total land a circle, what is extra land?

1,400,000,000 ha

n degree?

rees

Africa 30 million km2 or 3,000,000,000

Total land 148,940,000 km2

or

14,894,000,000

Res

1

10

30

Ying s

5

4.6

3.75

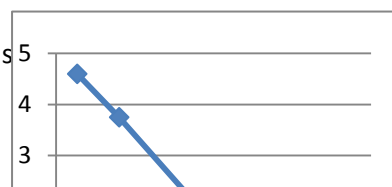

|            |              |                   |            |      |
|------------|--------------|-------------------|------------|------|
| Ying say % | Resolution m | % inc land surfar | 100        |      |
|            | 1            | 4.52              | Diff check | 1100 |
|            | 10           | 4.25              |            |      |
| 4.6        | 30           | 3.75              | 2.49       |      |
| 3.75       | 100          | 2.51              | 3.00       |      |
|            | 1000         | 0.37              | 0.00       |      |
| 0.5        | 10000        | 0                 | 2.60       |      |
| 0          |              |                   |            |      |

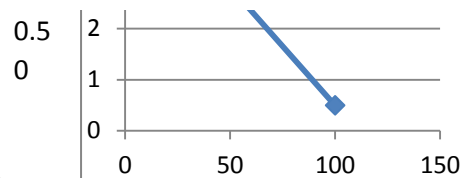

diff %      diff check  
 1.19  
 1.0119073   1.19073018

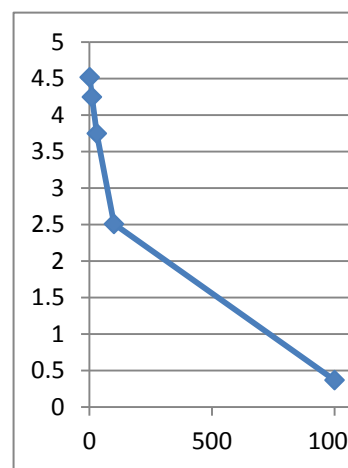

### levant for quadrats.

|            |           |        |
|------------|-----------|--------|
| Hypotenuse | True area | diff % |
| 3.518      | 12.1850   |        |
|            | 12.1850   |        |

1.54 At O840 i calculate that country land area totals give 0

### culations

|            |            |        |
|------------|------------|--------|
| Hypotenuse | True area  | diff % |
| 22.8363    | 404.763262 | 1.19   |

|            |           |        |
|------------|-----------|--------|
| Hypotenuse | True area | diff % |
| 22.8363    | 409.5829  | 2.40   |

409.570821      2.39 Ditto (-ish due to pi points..)

|        |        |        |
|--------|--------|--------|
|        |        | Diff % |
| 340    | 70%    |        |
| 375.7  | 10.50% |        |
| 381.41 | 1.50%  | 90.71  |

index in original table above

|                 |    |             |             |
|-----------------|----|-------------|-------------|
| degree (180/pi) |    | sqrt = base | pi/180      |
| 57.29578        | 15 | 2.23        | 3.872983346 |
| 45              |    |             | 0.01745     |

| Area Gha  | degree (180/ | sqrt = base | pi/180  | sum         | sec         |
|-----------|--------------|-------------|---------|-------------|-------------|
| 0.000018  | 0.70241107   | 0.004242641 | 0.01745 | 0.012257073 | 1.000075123 |
| 0.065209  | 4.24015148   | 0.255360529 | 0.01745 | 0.073990643 | 1.002743566 |
| 0.12467   | 1.30268153   | 0.353086392 | 0.01745 | 0.022731793 | 1.000258423 |
| 0.000009  | 0.0148969    | 0.003       | 0.01745 | 0.000259951 | 1.000000034 |
| 0.00274   | 5.96632281   | 0.052345009 | 0.01745 | 0.104112333 | 1.005444275 |
| 0.000047  | 10.0784999   | 0.006855655 | 0.01745 | 0.175869823 | 1.015666944 |
| 0.00008   | 0.3896053    | 0.008944272 | 0.01745 | 0.006798612 | 1.000023111 |
| 0.00836   | 1.209907     | 0.091433036 | 0.01745 | 0.021112877 | 1.000222918 |
| 0.273669  | 1.29924555   | 0.523133826 | 0.01745 | 0.022671835 | 1.000257061 |
| 0.00282   | 4.67524478   | 0.053103672 | 0.01745 | 0.081583021 | 1.003337149 |
| 0.00002   | 4.02241782   | 0.004472136 | 0.01745 | 0.070191191 | 1.002468469 |
| 0.000044  | 0.00687549   | 0.00663325  | 0.01745 | 0.000119977 | 1.000000007 |
| 0.76823   | 0.23204664   | 0.876487307 | 0.01745 | 0.004049214 | 1.000008198 |
| 0.008245  | 6.33107322   | 0.090801982 | 0.01745 | 0.110477228 | 1.006133799 |
| 0.0082605 | 2.90812573   | 0.090887293 | 0.01745 | 0.050746794 | 1.001289002 |
| 0.002568  | 2.70292689   | 0.050675438 | 0.01745 | 0.047166074 | 1.001113351 |
| 0.003023  | 0.70985839   | 0.054981815 | 0.01745 | 0.012387029 | 1.000076724 |
| 0.011062  | 0.21600407   | 0.105176043 | 0.01745 | 0.003769271 | 1.000007104 |
| 0.02736   | 0.36554212   | 0.165408585 | 0.01745 | 0.00637871  | 1.000020344 |
| 0.013017  | 0.2876224    | 0.114092068 | 0.01745 | 0.005019011 | 1.000012595 |
| 0.011063  | 2.57542825   | 0.105180797 | 0.01745 | 0.044941223 | 1.001010707 |
| 0.000071  | 0.35923983   | 0.00842615  | 0.01745 | 0.006268735 | 1.000019649 |
| 0.001001  | 0.08250587   | 0.031638584 | 0.01745 | 0.001439727 | 1.000001036 |
| 0.00512   | 4.04693303   | 0.071554175 | 0.01745 | 0.070618981 | 1.002498712 |
| 0.020748  | 0.3093942    | 0.144041661 | 0.01745 | 0.005398929 | 1.000014574 |
| 0.002281  | 0.92581922   | 0.047759816 | 0.01745 | 0.016155545 | 1.000130515 |
| 0.000005  | 0.01718873   | 0.002236068 | 0.01745 | 0.000299943 | 1.000000045 |
| 0.108438  | 1.34219456   | 0.329299256 | 0.01745 | 0.023421295 | 1.000274341 |
| 0.845942  | 0.37470906   | 0.919751053 | 0.01745 | 0.006538673 | 1.000021378 |
| 0.000043  | 1.47847584   | 0.006557439 | 0.01745 | 0.025799403 | 1.000332897 |
| 0.000527  | 0.78261168   | 0.022956481 | 0.01745 | 0.013656574 | 1.000093258 |
| 0.0047    | 10.9375828   | 0.068556546 | 0.01745 | 0.19086082  | 1.018494539 |
| 0.056673  | 0.27960119   | 0.238060917 | 0.01745 | 0.004879041 | 1.000011903 |
| 0.0623    | 0.30251891   | 0.249599679 | 0.01745 | 0.005278955 | 1.000013934 |
| 0.909351  | 1.5437476    | 0.953598972 | 0.01745 | 0.026938396 | 1.000362948 |
| 0.000001  | 0.01776169   | 0.001       | 0.01745 | 0.000309942 | 1.000000048 |
| 0.004     | 8.53020533   | 0.063245553 | 0.01745 | 0.148852083 | 1.011181678 |



|           |            |             |         |             |             |
|-----------|------------|-------------|---------|-------------|-------------|
| 0.07488   | 4.21222902 | 0.273642102 | 0.01745 | 0.073503396 | 1.002707469 |
| 0.932748  | 3.1440975  | 0.965788797 | 0.01745 | 0.054864501 | 1.001506947 |
| 0.0318    | 0.34033293 | 0.178325545 | 0.01745 | 0.00593881  | 1.000017635 |
| 0.04654   | 0.78719448 | 0.215731314 | 0.01745 | 0.013736544 | 1.000094354 |
| 0.226705  | 0.67434019 | 0.476135485 | 0.01745 | 0.011767236 | 1.000069238 |
| 0.03415   | 0.23261959 | 0.184797186 | 0.01745 | 0.004059212 | 1.000008239 |
| 0.000024  | 1.51282989 | 0.004898979 | 0.01745 | 0.026398882 | 1.000348552 |
| 0.11095   | 1.36109164 | 0.333091579 | 0.01745 | 0.023751049 | 1.000282122 |
| 0.0001861 | 5.17061273 | 0.013641847 | 0.01745 | 0.090227192 | 1.004084326 |
| 0.000403  | 3.7201351  | 0.02007486  | 0.01745 | 0.064916357 | 1.002110773 |
| 0.005106  | 3.26689821 | 0.07145628  | 0.01745 | 0.057007374 | 1.001627124 |
| 0.010982  | 0.82958492 | 0.104795038 | 0.01745 | 0.014476257 | 1.00010479  |
| 0.0000135 | 1.99137204 | 0.003674235 | 0.01745 | 0.034749442 | 1.000604066 |
| 0.000026  | 0.13579074 | 0.00509902  | 0.01745 | 0.002369548 | 1.000002807 |
| 0.000924  | 4.49819455 | 0.030397368 | 0.01745 | 0.078493495 | 1.003088543 |
| 0.007727  | 1.62962536 | 0.087903356 | 0.01745 | 0.028436963 | 1.000404467 |
| 0.034877  | 1.09192535 | 0.186753849 | 0.01745 | 0.019054097 | 1.000181557 |
| 0.002318  | 3.67106544 | 0.048145612 | 0.01745 | 0.064060092 | 1.002055362 |
| 0.000075  | 0.00286479 | 0.008660254 | 0.01745 | 4.99906E-05 | 1.000000001 |
| 0.004243  | 0.35007286 | 0.065138314 | 0.01745 | 0.006108771 | 1.000018659 |
| 0.004838  | 2.57371285 | 0.069555733 | 0.01745 | 0.044911289 | 1.00100936  |
| 0.238174  | 0.8278664  | 0.488030737 | 0.01745 | 0.014446269 | 1.000104356 |
| 0.027684  | 1.9736316  | 0.166385095 | 0.01745 | 0.034439871 | 1.000593346 |
| 0.099545  | 1.14633558 | 0.315507528 | 0.01745 | 0.020003556 | 1.000200104 |
| 0.0101    | 3.81198331 | 0.100498756 | 0.01745 | 0.066519109 | 1.002216482 |
| 0.0266    | 0.32371771 | 0.163095064 | 0.01745 | 0.005648874 | 1.000015955 |
| 0.0499    | 2.89783895 | 0.223383079 | 0.01745 | 0.05056729  | 1.001279889 |
| 0.004239  | 0.23720317 | 0.065107603 | 0.01745 | 0.004139195 | 1.000008567 |
| 0.1       | 2.40100563 | 0.316227766 | 0.01745 | 0.041897548 | 1.000878345 |
| 0.030459  | 0.68866211 | 0.17452507  | 0.01745 | 0.012017154 | 1.00007221  |
| 0.001827  | 2.13213715 | 0.042743421 | 0.01745 | 0.037205793 | 1.000692535 |
| 0.001217  | 0.49215865 | 0.034885527 | 0.01745 | 0.008588168 | 1.000036879 |
| 0.05501   | 1.95074016 | 0.234542107 | 0.01745 | 0.034040416 | 1.000579655 |
| 0.00014   | 4.69630275 | 0.01183216  | 0.01745 | 0.081950483 | 1.003367363 |
| 0.00007   | 2.06747985 | 0.0083666   | 0.01745 | 0.036077523 | 1.000651147 |
| 0.025767  | 0.33403061 | 0.160521027 | 0.01745 | 0.005828834 | 1.000016988 |
| 0.024269  | 1.07588828 | 0.155785108 | 0.01745 | 0.01877425  | 1.000176262 |
| 0.006949  | 6.42331312 | 0.083360662 | 0.01745 | 0.112086814 | 1.006314779 |
| 0.022754  | 0.34434349 | 0.150844291 | 0.01745 | 0.006008794 | 1.000018053 |
| 0.000001  | 12.1081386 | 0.001       | 0.01745 | 0.211287018 | 1.022743972 |
| 0.024572  | 1.12800815 | 0.156754585 | 0.01745 | 0.019683742 | 1.000193756 |
| 0.000169  | 1.85001051 | 0.013       | 0.01745 | 0.032282683 | 1.000521312 |
| 0.001     | 0.52424176 | 0.031622777 | 0.01745 | 0.009148019 | 1.000041845 |
| 0.002812  | 0.74594891 | 0.053028294 | 0.01745 | 0.013016808 | 1.000084725 |
| 0.002805  | 0.83015776 | 0.052962251 | 0.01745 | 0.014486253 | 1.000104935 |
| 0.01289   | 5.23709732 | 0.113534136 | 0.01745 | 0.091387348 | 1.004190404 |
| 0.000034  | 3.23662915 | 0.005830952 | 0.01745 | 0.056479179 | 1.001597071 |
| 0.2175    | 0.88686784 | 0.466368953 | 0.01745 | 0.015475844 | 1.000119763 |
| 0.010843  | 2.80124841 | 0.104129727 | 0.01745 | 0.048881785 | 1.001195905 |
| 0.008815  | 0.31283185 | 0.093888231 | 0.01745 | 0.005458916 | 1.0000149   |

|          |            |             |         |             |             |
|----------|------------|-------------|---------|-------------|-------------|
| 0.000054 | 1.04553192 | 0.007348469 | 0.01745 | 0.018244532 | 1.000166455 |
| 0.019685 | 0.42627274 | 0.140303243 | 0.01745 | 0.007438459 | 1.000027666 |
| 0.00011  | 3.82852533 | 0.010488088 | 0.01745 | 0.066807767 | 1.002235797 |
| 0.011189 | 3.33314107 | 0.10577807  | 0.01745 | 0.058163312 | 1.001693873 |
| 0.005592 | 2.20022171 | 0.074779676 | 0.01745 | 0.038393869 | 1.000737498 |
| 0.002756 | 3.68932455 | 0.052497619 | 0.01745 | 0.064378713 | 1.002075894 |
| 0.008962 | 0.62449927 | 0.09466784  | 0.01745 | 0.010897512 | 1.000059381 |
| 0.181157 | 1.48191129 | 0.425625422 | 0.01745 | 0.025859352 | 1.000334446 |
| 0.297319 | 1.62790788 | 0.545269658 | 0.01745 | 0.028406992 | 1.000403614 |
| 0.000008 | 0.02119944 | 0.002828427 | 0.01745 | 0.00036993  | 1.000000068 |
| 0.006889 | 0.96018737 | 0.083       | 0.01745 | 0.01675527  | 1.000140386 |
| 0.162855 | 3.98250617 | 0.403552971 | 0.01745 | 0.069494733 | 1.002419628 |
| 0.043737 | 1.09937108 | 0.209133928 | 0.01745 | 0.019184025 | 1.000184042 |
| 0.010025 | 3.04412204 | 0.100124922 | 0.01745 | 0.05311993  | 1.001412524 |
| 0.002164 | 2.75266131 | 0.046518813 | 0.01745 | 0.04803394  | 1.00115474  |
| 0.029411 | 4.29257187 | 0.171496356 | 0.01745 | 0.074905379 | 1.002811982 |
| 0.001083 | 2.76923854 | 0.032908965 | 0.01745 | 0.048323212 | 1.001168704 |
| 0.008824 | 1.78418662 | 0.093936149 | 0.01745 | 0.031134056 | 1.000484861 |
| 0.03645  | 3.59060239 | 0.190918831 | 0.01745 | 0.062656012 | 1.001966104 |
| 0.26997  | 0.6714758  | 0.519586374 | 0.01745 | 0.011717253 | 1.000068651 |
| 0.056914 | 1.02032997 | 0.238566553 | 0.01745 | 0.017804758 | 1.000158526 |
| 0.01918  | 7.46606498 | 0.138491877 | 0.01745 | 0.130282834 | 1.008547247 |
| 0.017652 | 0.81411824 | 0.132860829 | 0.01745 | 0.014206363 | 1.000100919 |
| 0.000081 | 0.01203211 | 0.009       | 0.01745 | 0.00020996  | 1.000000022 |
| 0.000026 | 0.00687549 | 0.00509902  | 0.01745 | 0.000119977 | 1.000000007 |
| 0.009873 | 3.32343362 | 0.099362971 | 0.01745 | 0.057993917 | 1.001684007 |
| 0.001782 | 0.39590754 | 0.042213742 | 0.01745 | 0.006908587 | 1.000023865 |
| 0.02308  | 3.99048881 | 0.151921032 | 0.01745 | 0.06963403  | 1.002429357 |
| 0.001023 | 6.86649491 | 0.031984371 | 0.01745 | 0.119820336 | 1.007221651 |
| 0.009632 | 0.39819926 | 0.098142753 | 0.01745 | 0.006948577 | 1.000024142 |
| 0.175954 | 0.64397745 | 0.419468712 | 0.01745 | 0.011237406 | 1.000063143 |
| 0.000061 | 3.34284833 | 0.00781025  | 0.01745 | 0.058332703 | 1.001703768 |
| 0.000016 | 9.74825109 | 0.004       | 0.01745 | 0.170106982 | 1.01464471  |
| 0.006463 | 0.98080794 | 0.080392786 | 0.01745 | 0.017115099 | 1.000146481 |
| 0.003035 | 9.97905063 | 0.055090834 | 0.01745 | 0.174134434 | 1.015355349 |
| 0.006268 | 0.33116592 | 0.079170702 | 0.01745 | 0.005778845 | 1.000016698 |
| 0.000259 | 1.62905287 | 0.016093477 | 0.01745 | 0.028426973 | 1.000404182 |
| 0.006205 | 0.29908126 | 0.078771822 | 0.01745 | 0.005218968 | 1.000013619 |
| 0.000003 | 1.10051657 | 0.001732051 | 0.01745 | 0.019204014 | 1.000184425 |
| 0.04463  | 3.92035034 | 0.211258136 | 0.01745 | 0.068410113 | 1.002344543 |
| 0        | 11.7686551 | 0           | 0.01745 | 0.205363032 | 1.021464004 |
| 0.003288 | 1.44755629 | 0.057341085 | 0.01745 | 0.025259857 | 1.000319115 |
| 0.058154 | 1.82425391 | 0.241151405 | 0.01745 | 0.031833231 | 1.000506891 |
| 0.00003  | 0.01375099 | 0.005477226 | 0.01745 | 0.000239955 | 1.000000029 |
| 0.194395 | 2.74522999 | 0.440902484 | 0.01745 | 0.047904263 | 1.001148507 |
| 0.000018 | 0.01890761 | 0.004242641 | 0.01745 | 0.000329938 | 1.000000054 |
| 0.002543 | 4.68207453 | 0.050428167 | 0.01745 | 0.081702201 | 1.003346933 |
| 0.122019 | 0.22517126 | 0.349312181 | 0.01745 | 0.003929238 | 1.00000772  |
| 0.000032 | 2.45762653 | 0.005656854 | 0.01745 | 0.042885583 | 1.000920292 |
| 0.065755 | 3.15780694 | 0.256427378 | 0.01745 | 0.055103731 | 1.001520134 |

|           |            |             |         |             |             |
|-----------|------------|-------------|---------|-------------|-------------|
| 0.15665   | 1.91983572 | 0.395790349 | 0.01745 | 0.033501133 | 1.000561426 |
| 0.000046  | 2.61774011 | 0.00678233  | 0.01745 | 0.045679565 | 1.001044219 |
| 0.078638  | 0.947013   | 0.280424678 | 0.01745 | 0.016525377 | 1.00013656  |
| 0.10307   | 0.17647044 | 0.321045168 | 0.01745 | 0.003079409 | 1.000004741 |
| 0.00001   | 5.2882297  | 0.003162278 | 0.01745 | 0.092279608 | 1.004272923 |
| 0.000106  | 1.8963705  | 0.01029563  | 0.01745 | 0.033091665 | 1.000547779 |
| 0.000203  | 1.39544922 | 0.014247807 | 0.01745 | 0.024350589 | 1.000296549 |
| 0.009408  | 1.58038965 | 0.096994845 | 0.01745 | 0.027577799 | 1.000380388 |
| 0.032855  | 1.53744962 | 0.181259483 | 0.01745 | 0.026828496 | 1.000359992 |
| 0.0000374 | 3.32457568 | 0.006115554 | 0.01745 | 0.058013846 | 1.001685166 |
| 0.082329  | 1.42579758 | 0.286930305 | 0.01745 | 0.024880168 | 1.000309591 |
| 0.001828  | 2.48393361 | 0.042755117 | 0.01745 | 0.043344641 | 1.000940115 |
| 0.12667   | 0.27559058 | 0.355907291 | 0.01745 | 0.004809056 | 1.000011564 |
| 0.000004  | 1.87061525 | 0.002       | 0.01745 | 0.032642236 | 1.000532994 |
| 0.091077  | 0.47726281 | 0.301789662 | 0.01745 | 0.008328236 | 1.000034681 |
| 0.01214   | 1.53000651 | 0.110181668 | 0.01745 | 0.026698614 | 1.000356514 |
| 0.000026  | 0.27043407 | 0.00509902  | 0.01745 | 0.004719075 | 1.000011135 |
| 0.003388  | 0.06187942 | 0.058206529 | 0.01745 | 0.001079796 | 1.000000583 |
| 0.030428  | 4.8675644  | 0.174436235 | 0.01745 | 0.084938999 | 1.003618193 |
| 0.0143    | 8.2268172  | 0.119582607 | 0.01745 | 0.14355796  | 1.010393676 |
| 0.000002  | 0.44747094 | 0.001414214 | 0.01745 | 0.007808368 | 1.000030486 |
| 0.026771  | 3.56663192 | 0.163618459 | 0.01745 | 0.062237727 | 1.001939898 |
| 0.03095   | 1.7252273  | 0.175926121 | 0.01745 | 0.030105216 | 1.000453333 |
| 0.077088  | 3.24234044 | 0.277647258 | 0.01745 | 0.056578841 | 1.00160272  |
| 0.007443  | 2.36382772 | 0.086272823 | 0.01745 | 0.041248794 | 1.000851335 |
| 0.0000047 | 0.61132277 | 0.002167948 | 0.01745 | 0.010667582 | 1.000056901 |
| 0.128     | 2.09208459 | 0.357770876 | 0.01745 | 0.036506876 | 1.000666746 |
| 0.029817  | 3.10696596 | 0.172675997 | 0.01745 | 0.054216556 | 1.00147152  |
| 0.000046  | 0.74079315 | 0.00678233  | 0.01745 | 0.012926841 | 1.000083557 |
| 0.045286  | 2.41473234 | 0.212805075 | 0.01745 | 0.042137079 | 1.000888424 |
| 0.030436  | 0.54486644 | 0.174459164 | 0.01745 | 0.009507919 | 1.000045202 |
| 0.000887  | 2.24942182 | 0.029782545 | 0.01745 | 0.039252411 | 1.000770871 |
| 0.012041  | 4.39226462 | 0.10973149  | 0.01745 | 0.076645018 | 1.002944436 |
| 0.00915   | 2.25457048 | 0.095655632 | 0.01745 | 0.039342255 | 1.000774406 |
| 0.03973   | 0.39017823 | 0.199323857 | 0.01745 | 0.00680861  | 1.000023179 |
| 0.000602  | 4.53235896 | 0.024535688 | 0.01745 | 0.079089664 | 1.00313576  |
| 0.000366  | 3.22634869 | 0.019131126 | 0.01745 | 0.056299785 | 1.001586929 |
| 0.0011    | 0.28246591 | 0.033166248 | 0.01745 | 0.00492903  | 1.000012148 |
| 0.00025   | 6.08305187 | 0.015811388 | 0.01745 | 0.106149255 | 1.005660404 |
| 0.022971  | 2.29347027 | 0.151561869 | 0.01745 | 0.040021056 | 1.000801377 |
| 1.638134  | 1.87748339 | 1.27989609  | 0.01745 | 0.032762085 | 1.000536917 |
| 0.002467  | 4.99950743 | 0.049668904 | 0.01745 | 0.087241405 | 1.003817637 |
| 0.214969  | 1.44011257 | 0.463647495 | 0.01745 | 0.025129964 | 1.000315841 |
| 0.0102    | 2.94469946 | 0.100995049 | 0.01745 | 0.051385006 | 1.001321663 |
| 0.2376    | 0.67949609 | 0.487442304 | 0.01745 | 0.011857207 | 1.000070301 |
| 0.019253  | 0.37069852 | 0.13875518  | 0.01745 | 0.006468689 | 1.000020922 |
| 0.000067  | 0.02062648 | 0.008185353 | 0.01745 | 0.000359932 | 1.000000065 |
| 0.000039  | 6.38030969 | 0.006244998 | 0.01745 | 0.111336404 | 1.006230071 |
| 0         | 3.76178296 | 0           | 0.01745 | 0.065643113 | 1.002158384 |
| 0.002799  | 2.35410394 | 0.052905576 | 0.01745 | 0.041079114 | 1.00084434  |

|          |            |             |         |             |             |
|----------|------------|-------------|---------|-------------|-------------|
| 0.007162 | 0.7545418  | 0.0846286   | 0.01745 | 0.013166754 | 1.000086688 |
| 0.002072 | 2.71721881 | 0.045519227 | 0.01745 | 0.047415468 | 1.001125167 |
| 0.000006 | 3.14638243 | 0.00244949  | 0.01745 | 0.054904373 | 1.001509141 |
| 0.062734 | 0.98023515 | 0.250467563 | 0.01745 | 0.017105103 | 1.00014631  |
| 0.000023 | 1.41320024 | 0.004795832 | 0.01745 | 0.024660344 | 1.000304143 |
| 0.000096 | 3.42849224 | 0.009797959 | 0.01745 | 0.05982719  | 1.001792319 |
| 0.0156   | 0.46695027 | 0.12489996  | 0.01745 | 0.008148282 | 1.000033198 |
| 0.00481  | 2.88698047 | 0.069354164 | 0.01745 | 0.050377809 | 1.001270305 |
| 0.002014 | 4.41049128 | 0.044877611 | 0.01745 | 0.076963073 | 1.002968984 |
| 0.041033 | 1.44927406 | 0.202566039 | 0.01745 | 0.025289832 | 1.000319873 |
| 0.00172  | 4.90055507 | 0.041472883 | 0.01745 | 0.085514686 | 1.003667555 |
| 0.000046 | 6.35031618 | 0.00678233  | 0.01745 | 0.110813017 | 1.006171334 |
| 0.018378 | 1.24541408 | 0.135565482 | 0.01745 | 0.021732476 | 1.000236197 |
| 0.000043 | 0.00744845 | 0.006557439 | 0.01745 | 0.000129975 | 1.000000008 |
| 0.12592  | 0.65027918 | 0.354852082 | 0.01745 | 0.011347372 | 1.000064385 |
| 0.005439 | 0.42684566 | 0.073749576 | 0.01745 | 0.007448457 | 1.00002774  |
| 0.051089 | 1.61874791 | 0.226028759 | 0.01745 | 0.028247151 | 1.000399083 |
| 0.013996 | 9.07686875 | 0.118304691 | 0.01745 | 0.15839136  | 1.012676388 |
| 0.000001 | 0          | 0.001       | 0.01745 | 0           | 1           |
| 0.046993 | 0.47783573 | 0.216778689 | 0.01745 | 0.008338233 | 1.000034764 |
| 0.001487 | 2.86297678 | 0.038561639 | 0.01745 | 0.049958945 | 1.001249247 |
| 0.000072 | 1.14118101 | 0.008485281 | 0.01745 | 0.019913609 | 1.000198309 |
| 0.000513 | 0.92295518 | 0.022649503 | 0.01745 | 0.016105568 | 1.000129709 |
| 0.015536 | 1.19100769 | 0.124643492 | 0.01745 | 0.020783084 | 1.000216007 |
| 0.076963 | 4.44466387 | 0.277422061 | 0.01745 | 0.077559385 | 1.003015286 |
| 0.000003 | 0.03151268 | 0.001732051 | 0.01745 | 0.000549896 | 1.000000151 |
| 0.003615 | 5.58860114 | 0.06012487  | 0.01745 | 0.09752109  | 1.004774098 |
| 0.08858  | 1.03923147 | 0.297623924 | 0.01745 | 0.018134589 | 1.000164454 |
| 0.01971  | 1.38857778 | 0.140392307 | 0.01745 | 0.024230682 | 1.000293635 |
| 0.057935 | 0.7545418  | 0.240696905 | 0.01745 | 0.013166754 | 1.000086688 |
| 0        | 0.00630254 | 0           | 0.01745 | 0.000109979 | 1.000000006 |
| 0.017502 | 0.73506453 | 0.132295125 | 0.01745 | 0.012826876 | 1.00008227  |
| 0.916192 | 1.9381496  | 0.957179189 | 0.01745 | 0.033820711 | 1.000572193 |
| 0.04254  | 0.91035333 | 0.206252273 | 0.01745 | 0.015885666 | 1.00012619  |
| 0        | 0.665747   | 0           | 0.01745 | 0.011617285 | 1.000067484 |
| 0.000039 | 4.80214233 | 0.006244998 | 0.01745 | 0.083797384 | 1.003521303 |
| 0.088205 | 0.9830991  | 0.296993266 | 0.01745 | 0.017155079 | 1.000147166 |
| 0.000015 | 1.79334501 | 0.003872983 | 0.01745 | 0.03129387  | 1.000489853 |
| 0.000035 | 2.09151239 | 0.00591608  | 0.01745 | 0.036496891 | 1.000666381 |
| 0.031106 | 3.20692946 | 0.176368932 | 0.01745 | 0.055960919 | 1.001567858 |
| 0.001219 | 2.69606664 | 0.034914181 | 0.01745 | 0.047046363 | 1.001107702 |
| 0.000014 | 2.00739533 | 0.003741657 | 0.01745 | 0.035029048 | 1.000613831 |
| 0.000283 | 2.65890566 | 0.016822604 | 0.01745 | 0.046397904 | 1.001077349 |
| 0.052797 | 3.52211202 | 0.229775978 | 0.01745 | 0.061460855 | 1.001891696 |
| 0.121447 | 2.82925561 | 0.348492468 | 0.01745 | 0.04937051  | 1.001219963 |
| 0.074339 | 0.81469108 | 0.272651793 | 0.01745 | 0.014216359 | 1.000101061 |
| 0.038685 | 1.85115523 | 0.196685027 | 0.01745 | 0.032302659 | 1.000521958 |

13.194 2.25

Area Gha degree (180/pi)

1,400,000,000 ha

Plus Antarctica

1.61564082

Land of 15 Gha x mean exta 0.15%

THIS IS VERY SMALL ADDITIONAL LAND  
AT 1m or even cm scale would expect

If it was for CO2 the value would be x 44; for c in CO2 is x 0.273!

% water  
0.8  
98.2  
0.8  
98.2

mistake or accuracy error, eitherway the are not talking about CO2

reactive C  
900  
1,500  
800  
791  
14.3  
4,005.3

|       | Area Gha | mean Org-C<br>/m <sup>2</sup> /yr g | Org-C /ha/yr t | Total Org-C/yr Gt |
|-------|----------|-------------------------------------|----------------|-------------------|
| Land  | 15       | 144                                 | 1.44           | 21.6              |
| Sea   | 36       | 72                                  | 0.72           | 25.92             |
| Total | 51       | 0                                   | 0              | 47.52             |

|      |     |
|------|-----|
|      | %   |
| Land | 45  |
| Sea  | 55  |
| Tot  | 100 |

NPP sea Whitman et al. 1989: tab. 6  
g/m2/yr Tot  
48.0  
NPP sea from Duursma & Poisson  
g/m2/yr Tot  
72 25.9

NPP land Whitman et al. 1989: tab. 6  
g/m2/yr      Tot  
                    51.0  
NPP land from Duursma & Poisson  
g/m2/yr      Tot  
         144      21.6

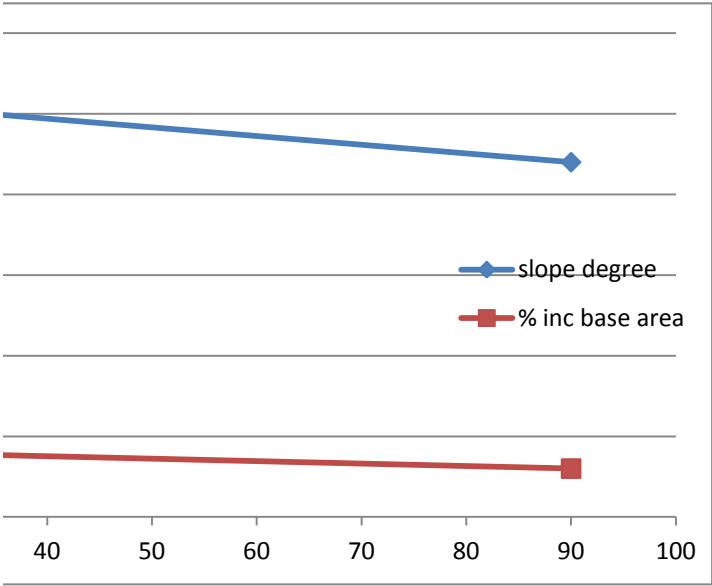

Applications  
Astronomy  
  
Terrain, biomes, soil  
ika (projected)  
alc.)  
ika

ika  
Araújo  
  
Araújo  
  
Araújo

As terrain includes Antarctica, 15 Gha  
Area increase for ter

|                            |                                      |
|----------------------------|--------------------------------------|
| Productivity               | (A) mean m (n=3)                     |
|                            | (a) % increase 2.4                   |
| recalc.)                   | (b) Land 15 Gha 15.4                 |
| recalc.)                   | (c) Soil 12 Gha (8 12.3              |
| Soil moisture, respiration | (d) Difference 3.1                   |
|                            | (e) Soil 12.3 Gha (c) x (C) then (D) |
|                            | (f) Soil 14.6 Gha (c) x (C) then (D) |
|                            | Total (e) + Difference (d) (A)       |
|                            | Total (f) + Difference (d) (B)       |

SOM and colloid gas exchange

Total land is between 52-62 Gha + 36  
 Allowing for microscopic porosity this  
 OR TRY THE TOTAL AND JUST REDUCE

|                                                        |                                                    |
|--------------------------------------------------------|----------------------------------------------------|
| 2.475 Median value %                                   |                                                    |
| %                                                      | 15.36 terrain/slope                                |
|                                                        | 15.85 tortuosity/rugosity                          |
| NEW LAND =                                             | 36.00 micro-relief                                 |
| NEW WORL                                               | 72.00 new global area including 36 Gha Ratio = 2.0 |
| terrain/slope                                          |                                                    |
| tortuosity/rugosity                                    | 36x2 = 72                                          |
| micro-relief                                           |                                                    |
| new global area including 36 Gha seas Ratio = 2.2 to 1 |                                                    |
| 75.0                                                   | 1.5 times increase 47.1 % increase                 |

BIOMASS and PRODUCTIVITY ADJUSTMENTS (dependent upon original land area basis)

| Scale of repo | Land area basis | % increase | New land Gha | Multiplication factor |
|---------------|-----------------|------------|--------------|-----------------------|
| m2 (up to ha] | 15              | 2.5        | 15.4         | 1.03                  |
| m2 (up to ha] | 15              | 21.25      | 18.2         | 1.71                  |
| of .. cm2*    | 15.4            | 94.0       | 23.9         | 1.59                  |
| cm2*          | 18.2            | 94.0       | 28.2         | 2.65                  |
| mm2           | 23.9            | 108.2      | 49.7         | 3.31                  |
| mm2           | 28.2            | 108.2      | 58.8         | 3.92                  |

\*80% of total flat land area is habitable with soil (15 x 0.8 = 12 Gha); but need to add

\*\*Most megafauna and trees are ha-1; mesofauna/flora m-2; microbes g-1 = cm-2; h

Antarctic is included as it too has a fauna composed mainly of seabirds, penguins and

Biomass on land is increased by at least 3 times (tripled) and possibly up to 3.9 times

For energetics, the scale of measurment is the Joule ( kg m2 s-2 ), calorie (1 g water 1

NOTE: much land is hilly so can keep the average terrrain hi 21.25%.

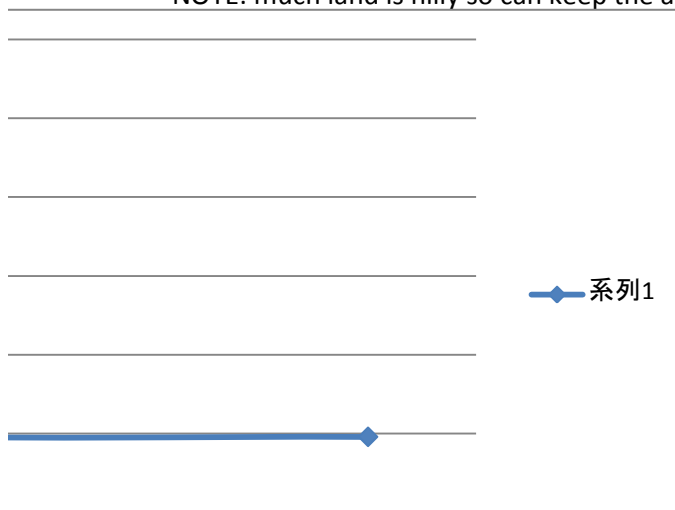

|   |   |   |    |    |
|---|---|---|----|----|
| 4 | 6 | 8 | 10 | 12 |
|---|---|---|----|----|

Or if arbitrary...

|            |     |         |     |
|------------|-----|---------|-----|
| 87.48 Gha  |     | 64 Gha  |     |
| 36 Gha     |     | 36 Gha  |     |
| 123.48 Gha |     | 100 Gha |     |
| 2.43 : 1   |     | 1.8 : 1 |     |
| 71         | 29% | 64      | 36% |

iges/18/Different+ecosystems+vary+considerably+in+their+net+primary+production.jpg

%

24.5 OK  
5.6 OK  
1.4 OK  
0.8 OK  
0.2 OK  
0.0 OK  
1.0 OK  
21.9 OK  
7.9 OK  
5.3 **NOK needs correction**  
5.8 **NOK needs correction**  
3.3 **NOK needs correction**  
3.6 OK  
0.7 OK  
7.2 OK  
4.7 OK  
3.9 OK  
2.4 OK  
0.3 OK  
100  
OK  
**32.4**  
**65.3**  
**2.7**

Gt C per year!!

Applications" (Prentice Hall) - this from [https://en.wikipedia.org/wiki/Primary\\_production](https://en.wikipedia.org/wiki/Primary_production)

| %land | %sea      | check     |       |
|-------|-----------|-----------|-------|
|       | 45        | 55        | 100.0 |
|       | 48        | 52        | 100.0 |
|       | 68        | 32        | 100.0 |
|       | 54        | 46        | 100.0 |
|       | 67        | 33        | 100.0 |
| -     | -         |           |       |
|       | <b>81</b> | <b>19</b> | 100.0 |



|           |           |       |
|-----------|-----------|-------|
| <b>89</b> | <b>11</b> | 100.0 |
| 61        | 39        | 100.0 |

apparently almost equivalent.

ferent because they also have freshwater...

[ine.com/doi/full/10.4155/cmt.13.77?scroll=top&needAccess=true](https://doi.org/10.4155/cmt.13.77?scroll=top&needAccess=true)

- Wild mammals
- Farm stock & pets
- Humans

icle-to-commemorate-charles-darwins-birthday-on-12th-feb/.

eric\_CO2\_in\_global\_carbon\_pools .

| FAO                     | Gha | %    |      |
|-------------------------|-----|------|------|
| Total grasslar          |     | 5.25 | 40.5 |
| composed of...          |     |      |      |
| woody savannah/savannah |     |      | 13.8 |
| open/closed shrub       |     |      | 12.7 |
| non-woody grassland     |     |      | 8.3  |
| tundra                  |     |      | 5.7  |
|                         | TOT |      | 40.5 |

3 m soil depth) from Jobaggy & Jackson (2000) upon which most NASA/NOAA data is based (<http://>

| %SOC       | % sorted area    | %sorted SOC |                               |
|------------|------------------|-------------|-------------------------------|
| 6.4        | Boreal forest    | 1239.669421 | Boreal forest 6.396588486     |
| 10.6       | Crops            | 2049.586777 | Crops 10.57569296             |
| 8.9        | Deserts          | 1719.008264 | Deserts 8.869936034           |
| 5.3        | Dry shrubs       | 1024.793388 | Dry shrubs 5.287846482        |
| 6.8        | Temp decid fore  | 1322.31405  | Temp decid fores 6.823027719  |
| 4.3        | Temp everg fore  | 842.9752066 | Temp everg fores 4.349680171  |
| 7.3        | Temp grass       | 1421.487603 | Temp grass 7.334754797        |
| 9.3        | Trop decid fores | 1801.652893 | Trop decid forest 9.296375267 |
| 20.2       | Trop everg fores | 3917.355372 | Trop everg forest 20.21321962 |
| 14.7       | Trop savannah    | 2851.239669 | Trop savannah 14.71215352     |
| 6.1        | Tundra           | 1190.082645 | Tundra 6.140724947            |
| <b>100</b> | Total            |             | Total                         |

JRK AS AN APPROX!!!

IF DOUBLE LAND AREA TO 24.2 get

| Sorted by SOC |          |                |              |
|---------------|----------|----------------|--------------|
| Biome         | Area Gha | SOC 0-3m kg/m2 | SOC 0-3 m Gt |
| Trop everg fc | 1.7      | 27.9           | 47.43        |
| Trop savann   | 1.5      | 23             | 34.5         |
| Crops         | 1.4      | 17.7           | 24.78        |
| Trop decid fc | 0.75     | 29.1           | 21.825       |
| Deserts       | 1.8      | 11.5           | 20.7         |
| Temp grass    | 0.9      | 19.1           | 17.19        |

|               |      |       |         |      |
|---------------|------|-------|---------|------|
| Temp decid    | 10.7 | 22.8  | 15.96   | 160  |
| Boreal forest | 1.2  | 12.5  | 15      | 150  |
| Tundra        | 0.8  | 18    | 14.4    | 144  |
| Dry shrubs    | 0.85 | 14.6  | 12.41   | 124  |
| Temp everg    | 10.5 | 20.4  | 10.2    | 102  |
| Total         | 12.1 | 216.6 | 234.395 | 2345 |

# %SOC

|            |     |      |       |
|------------|-----|------|-------|
| 29.5       |     |      |       |
| 8.9        |     |      |       |
| 14.7       |     |      |       |
| 10.6       |     |      |       |
| 11.2       |     |      |       |
| 6.4        |     |      |       |
| 7.3        | 0.7 | 22.8 | 15.96 |
| 5.3        | 0.5 | 20.4 | 10.20 |
| 6.1        | 1.2 | 43.2 | 51.84 |
| <b>100</b> |     |      |       |

n et al (2000)

# C %

|              |
|--------------|
| 8.0          |
| 13.3         |
| 17.3         |
| 5.3          |
| 22.6         |
| 12.3         |
| 6.4          |
| 5.1          |
| 9.7          |
| <b>100.0</b> |

andle/20.500.11822/19113/Costanza\_et\_al\_GEC\_2014\_%2b\_SI.pdf?sequence=1&isAllowed=y

|   | For 1.4 gm-3 | For 1.5 gm-3 |
|---|--------------|--------------|
| x | 1.5          | 1.6          |
| x | 2.2          | 2.3          |
| x | 2.8          | 3.1          |
| x | 2.2          | 2.3          |
|   | 2.2          | 2.3          |
|   | 2.2          | 2.3          |

Cf. 1,500 Gt

1.4 x

2.8 x

5.6 x

4.2 <--cf. 3,000

8.4 <--cf. 3,000

c-meter-soil-weigh-e48660fa83d913ab), then 120,000 m3 will weigh

x

x

x

My calculations seem reasoned and reasonable based upon these presumptions.

3ha, i.e., out by a factor of 100. Q.E.D. again.

.B. 2017- 11th November, 2018.

| Hipotenusa (raiz da soma) Diff | Diff x diff | Diff + 1 | Sqrt |             |
|--------------------------------|-------------|----------|------|-------------|
| 3.1622777                      | -3          | 9        | 10   | 3.16227766  |
| 1                              | 0           | 0        | 1    | 1           |
| 1.4142136                      | 1           | 1        | 2    | 1.414213562 |
| 1                              | 0           | 0        | 1    | 1           |
| 1                              | 0           | 0        | 1    | 1           |
| 1                              | 0           | 0        | 1    | 1           |
| 1.4142136                      | 1           | 1        | 2    | 1.414213562 |
| 1                              | 0           | 0        | 1    | 1           |
| 1.4142136                      | -1          | 1        | 2    | 1.414213562 |
| 1                              | 0           | 0        | 1    | 1           |
| 2.236068                       | 2           | 4        | 5    | 2.236067977 |
| 1                              | 0           | 0        | 1    | 1           |
| 1.4142136                      | -1          | 1        | 2    | 1.414213562 |
| 1                              | 0           | 0        | 1    | 1           |
| 3.1622777                      | 3           | 9        | 10   | 3.16227766  |
| 1                              | 0           | 0        | 1    | 1           |
| 1.4142136                      | 1           | 1        | 2    | 1.414213562 |
| 1                              | 0           | 0        | 1    | 1           |
| 1                              | 0           | 0        | 1    | 1           |
| 1                              | 0           | 0        | 1    | 1           |
| 1                              | 0           | 0        | 1    | 1           |
| 1                              | 0           | 0        | 1    | 1           |
| 2.236068                       | -2          | 4        | 5    | 2.236067977 |
| 1                              | 0           | 0        | 1    | 1           |
| 2.236068                       | -2          | 4        | 5    | 2.236067977 |
| 1                              | 0           | 0        | 1    | 1           |
| 1.4142136                      | 1           | 1        | 2    | 1.414213562 |

|           |    |    |    |             |
|-----------|----|----|----|-------------|
| 1         | 0  | 0  | 1  | 1           |
| 1.4142136 | 1  | 1  | 2  | 1.414213562 |
| 1         | 0  | 0  | 1  | 1           |
| 1.4142136 | 1  | 1  | 2  | 1.414213562 |
| 1         | 0  | 0  | 1  | 1           |
| 1.4142136 | 1  | 1  | 2  | 1.414213562 |
| 1         | 0  | 0  | 1  | 1           |
| 2.236068  | -2 | 4  | 5  | 2.236067977 |
| 1         | 0  | 0  | 1  | 1           |
| 1.4142136 | 1  | 1  | 2  | 1.414213562 |
| 1         | 0  | 0  | 1  | 1           |
| 1.4142136 | 1  | 1  | 2  | 1.414213562 |
| 1         | 0  | 0  | 1  | 1           |
| 2.236068  | -2 | 4  | 5  | 2.236067977 |
| 1         | 0  | 0  | 1  | 1           |
| 4.1231056 | -4 | 16 | 17 | 4.123105626 |
| 1         | 0  | 0  | 1  | 1           |
| 4.1231056 | -4 | 16 | 17 | 4.123105626 |
| 1         | 0  | 0  | 1  | 1           |
| 1         | 0  | 0  | 1  | 1           |
| 1         | 0  | 0  | 1  | 1           |
| 1.4142136 | -1 | 1  | 2  | 1.414213562 |
| 1         | 0  | 0  | 1  | 1           |
| 1.4142136 | -1 | 1  | 2  | 1.414213562 |
| 1         | 0  | 0  | 1  | 1           |
| 1         | 0  | 0  | 1  | 1           |
| 1         | 0  | 0  | 1  | 1           |
| 2.236068  | 2  | 4  | 5  | 2.236067977 |
| 1         | 0  | 0  | 1  | 1           |
| 1.4142136 | 1  | 1  | 2  | 1.414213562 |
| 1         | 0  | 0  | 1  | 1           |
| 1         | 0  | 0  | 1  | 1           |
| 1         | 0  | 0  | 1  | 1           |
| 1         | 0  | 0  | 1  | 1           |
| 1         | 0  | 0  | 1  | 1           |
| 1         | 0  | 0  | 1  | 1           |
| 1         | 0  | 0  | 1  | 1           |
| 4.1231056 | 4  | 16 | 17 | 4.123105626 |
| 1         | 0  | 0  | 1  | 1           |
| 1         | 0  | 0  | 1  | 1           |
| 1         | 0  | 0  | 1  | 1           |
| 2.236068  | 2  | 4  | 5  | 2.236067977 |
| 1         | 0  | 0  | 1  | 1           |
| 2.236068  | -2 | 4  | 5  | 2.236067977 |
| 1         | 0  | 0  | 1  | 1           |
| 2.236068  | -2 | 4  | 5  | 2.236067977 |
| 1         | 0  | 0  | 1  | 1           |
| 1         | 0  | 0  | 1  | 1           |
| 1         | 0  | 0  | 1  | 1           |
| 1.4142136 | 1  | 1  | 2  | 1.414213562 |

|           |   |           |    |             |
|-----------|---|-----------|----|-------------|
| 1         | 0 | 0         | 1  | 1           |
| 4.1231056 | 4 | 16        | 17 | 4.123105626 |
| 1         | 0 | 0         | 1  | 1           |
| 1.4142136 | 1 | 1         | 2  | 1.414213562 |
| 1         | 0 | 0         | 1  | 1           |
| 1         | 0 | 0         | 1  | 1           |
| 1         | 0 | 0         | 1  | 1           |
| 1         | 0 | 0         | 1  | 1           |
| 1         | 0 | 0         | 1  | 1           |
| 2.236068  | 2 | 4         | 5  | 2.236067977 |
| 1         | 0 | 0         | 1  | 1           |
| 2.236068  | 2 | 4         | 5  | 2.236067977 |
| 126.04114 |   |           |    |             |
|           |   | Total     |    | 126.0411426 |
|           |   | expect    |    | 89          |
|           |   | T = L1/Lo |    | 1.416192613 |

for curved hypoteneuses



| desert [%] | tropical | dist_coast | near_coast | gemstones | rgdppc_20 | rgdppc_19 | rgdppc_19 | rgdppc_20 |
|------------|----------|------------|------------|-----------|-----------|-----------|-----------|-----------|
| 0          | 100      | 0.001      | 100        | 0         |           |           |           |           |
| 4.356      | 0        | 0.922      | 0          | 0         |           | 644.756   | 720.633   | 565.231   |
| 0.425      | 44.346   | 0.428      | 13.1587    | 47756     | 1794.729  | 1051.822  | 1073.036  | 765.215   |
| 0          | 100      | 0          | 100        | 0         |           |           |           |           |
| 0          | 0        | 0.048      | 94.6919    | 0         | 3703.113  | 1001.339  | 2289.472  | 2741.42   |
| 0          | 0        | 0.134      | 0          | 0         |           |           |           |           |
| 0          | 74.555   | 0.001      | 100        | 0         |           |           |           |           |
| 77.28      | 0        | 0.065      | 75.7464    | 0         | 20604.46  | 15797.56  | 25465     | 17567.88  |
| 0          | 0        | 0.352      | 13.0167    | 0         | 12173.68  | 4986.725  | 8122.497  | 8543.558  |
| 0          | 0        | 0.348      | 0          | 0         | 2421.985  |           |           | 4565.035  |
| 0          | 100      | 0          | 100        | 0         |           |           |           |           |
| 0          | 100      | 0.001      | 100        | 0         | 10022.03  |           |           |           |
| 10.889     | 14.68    | 0.336      | 20.9399    | 264154    | 25417.44  | 7411.577  | 13169.83  | 21605.33  |
| 0          | 0        | 0.242      | 2.25634    | 0         | 28987.84  | 3706.075  | 11646.41  | 20691.42  |
| 0          | 0        | 0.584      | 0          | 0         | 2570.944  |           |           | 2538.14   |
| 0          | 75.354   | 0.906      | 0          | 0         | 621.652   | 360.142   | 534.858   | 495.977   |
| 0          | 0        | 0.113      | 45.9637    | 0         | 27302.99  | 5462.205  | 12440.79  | 20656.46  |
| 0          | 97.489   | 0.367      | 10.2806    | 0         | 959.222   | 1083.628  | 969.318   | 1282.898  |
| 0          | 49.82    | 0.735      | 0          | 0         | 998.416   | 474.313   | 669.515   | 921.09    |
| 0          | 75.038   | 0.071      | 71.3844    | 0         | 1479.086  | 539.544   | 528.607   | 861.7     |
| 0          | 0        | 0.149      | 31.4395    | 0         | 5979.171  | 1651.031  | 5830.809  | 5349.921  |
| 0          | 0        | 0.002      | 100        | 0         | 15928.09  | 2104.454  | 3922.257  | 5058.844  |
| 0          | 100      | 0.003      | 100        | 0         | 16977.2   |           |           |           |
| 0          | 0        | 0.117      | 42.7623    | 0         | 5294.975  |           |           | 5572.282  |
| 0          | 0        | 0.598      | 0          | 0         | 4802.11   |           |           | 6264.544  |
| 0          | 100      | 0.026      | 100        | 0         | 5869.233  |           |           |           |
| 0          | 0        | 0          | 100        | 0         |           |           |           |           |
| 0          | 64.878   | 0.655      | 0          | 0         | 2398.855  | 1919.359  | 2515.915  | 2574.755  |
| 0          | 88.567   | 0.642      | 9.68309    | 12159     | 7300.865  | 1671.723  | 4189.509  | 5556.415  |
| 0          | 100      | 0.002      | 100        | 0         | 15290.58  |           |           |           |
| 0          | 100      | 0.023      | 100        | 0         |           |           |           |           |
| 0          | 0        | 0.389      | 0          | 0         |           |           |           |           |
| 1.455      | 0        | 0.764      | 0          | 208687    | 7702.508  | 348.507   | 1223.49   | 4268.641  |
| 0          | 97.382   | 1.081      | 0          | 10802     | 1148.051  | 771.577   | 781.799   | 575.543   |
| 0          | 0        | 1.43       | 4.4433     | 5166      | 27289.26  | 7291.48   | 14316.26  | 22360.12  |
| 0          | 100      | 0          | 100        | 0         |           |           |           |           |
| 0          | 0        | 0.278      | 0          | 0         | 30161.29  | 9063.698  | 17224.02  | 22474.86  |
| 15.489     | 0        | 0.074      | 68.3825    | 0         | 9115.475  | 3669.742  | 4273.292  | 10310.83  |
| 5.77       | 0.301    | 0.987      | 5.76513    | 4410      | 3928.315  | 448.022   | 871.181   | 3420.866  |
| 0          | 100      | 0.284      | 16.359     | 3239      | 1575.628  | 1040.878  | 1800.013  | 1352.019  |
| 0          | 94.12    | 0.389      | 10.9018    | 0         | 1882.687  | 670.951   | 1051.615  | 1082.339  |
| 0          | 94.866   | 1.016      | 0.686405   | 87149     | 668.663   | 569.742   | 760.789   | 216.95    |
| 0          | 100      | 0.457      | 4.83001    | 0         | 957.403   | 1198.207  | 2191.133  | 2005.219  |
| 0          | 100      | 0          | 100        | 0         |           |           |           |           |
| 0          | 89.763   | 0.379      | 16.7275    | 0         | 6243.656  | 2152.841  | 3622.226  | 5095.796  |
| 0          | 100      | 0.003      | 100        | 0         | 1770.218  | 560.305   | 804.062   | 580.913   |
| 0          | 0        | 0.004      | 100        | 0         | 4859.108  | 449.648   | 524.742   | 1776.535  |

|        |        |       |         |       |          |          |          |          |
|--------|--------|-------|---------|-------|----------|----------|----------|----------|
| 0      | 94.017 | 0.031 | 100     | 0     | 8621.291 | 1963.132 | 4396.007 | 6173.734 |
| 0      | 100    | 0.02  | 100     | 0     |          | 2046.226 | 2404.287 | 2415.604 |
| 0      | 100    | 0     | 100     | 0     |          |          |          |          |
| 0      | 100    | 0.001 | 100     | 0     |          |          |          |          |
| 0      | 0      | 0.012 | 100     | 0     | 20318    |          |          |          |
| 0      | 0      | 0.426 | 0       | 0     | 15373.23 |          |          | 9155.582 |
| 0      | 0      | 0.246 | 19.7358 | 0     | 25481.43 | 3880.887 | 12040.61 | 18943.52 |
| 0      | 0      | 0.038 | 100     | 0     | 1881.967 | 1499.582 | 2065.445 | 1102.543 |
| 0      | 100    | 0.003 | 100     | 0     | 5931.715 |          |          |          |
| 0      | 0      | 0.019 | 100     | 0     | 28750.61 | 6943.104 | 13621.13 | 22975.16 |
| 0      | 87.817 | 0.029 | 100     | 0     | 6410.803 | 1026.788 | 2111.321 | 3649.014 |
| 23.277 | 0      | 0.752 | 4.17952 | 0     | 5417.91  | 1364.74  | 2521.953 | 2864.551 |
| 0      | 73.165 | 0.157 | 37.3544 | 0     | 3373.415 | 1862.933 | 3459.407 | 3203.386 |
| 16.498 | 0      | 0.325 | 22.7899 | 0     | 3598.329 | 909.903  | 1420.783 | 2936.674 |
| 1.764  | 0      | 0.104 | 56.1576 | 0     | 911.884  |          |          |          |
| 9.019  | 0      | 0.148 | 33.6288 | 0     |          |          |          |          |
| 0      | 0      | 0.131 | 42.9055 | 0     | 21764.83 | 2188.97  | 8346.302 | 15621.72 |
| 0      | 0      | 0.135 | 37.0373 | 0     | 9762.76  |          |          | 11710.01 |
| 1.008  | 29.455 | 0.466 | 2.26331 | 0     | 635.794  |          |          |          |
| 0      | 0      | 0.324 | 8.79128 | 0     | 25553.88 | 4253.287 | 11441.3  | 19770.36 |
| 0      | 100    | 0.009 | 100     | 0     | 4949.898 |          |          |          |
| 0      | 0      | 0.005 | 100     | 0     |          |          |          |          |
| 0      | 0      | 0.172 | 34.6184 | 0     | 25698.01 | 5271.312 | 13251.08 | 21025.38 |
| 0      | 0      | 0.001 | 100     | 0     |          |          |          |          |
| 0      | 100    | 0     | 100     | 0     |          |          |          |          |
| 0      | 100    | 0.195 | 28.1246 | 5200  | 6118.662 | 3108.377 | 9405.868 | 3847.075 |
| 0      | 0      | 0.034 | 96.3607 | 0     | 26332.05 | 6939.374 | 11847.09 | 20352.87 |
| 0      | 0      | 0.181 | 33.1835 | 0     | 1880.45  |          |          | 3243.627 |
| 0      | 100    | 0.283 | 19.3048 | 13275 | 1892.808 | 1121.794 | 1246.881 | 1269.883 |
| 0      | 0      | 0     | 100     | 0     |          |          |          |          |
| 0      | 100    | 0.263 | 14.9423 | 4864  | 1975.794 | 303.321  | 512.136  | 571.719  |
| 0      | 100    | 0.003 | 100     | 0     |          |          |          |          |
| 0      | 89.355 | 0.053 | 77.3706 | 0     | 1728.198 | 607.365  | 1049.606 | 894.813  |
| 0      | 100    | 0.045 | 87.3195 | 0     | 782.477  | 289.153  | 925.067  | 680.606  |
| 0      | 100    | 0.069 | 69.3531 | 0     | 15189.54 | 539.763  | 1294.001 | 7973.103 |
| 0      | 0      | 0.029 | 96.2131 | 0     | 17391.74 | 1915.007 | 7721.514 | 12110.87 |
| 0      | 100    | 0.001 | 100     | 0     | 7536.395 |          |          |          |
| 0      | 0      | 0.867 | 3.50187 | 0     |          |          |          |          |
| 0      | 78.376 | 0.099 | 48.2159 | 0     | 3974.407 | 2084.894 | 3683.875 | 4096.941 |
| 0      | 100    | 0.125 | 43.0358 | 0     |          |          |          |          |
| 0      | 100    | 0     | 100     | 0     |          |          |          |          |
| 0      | 100    | 0.215 | 28.642  | 1023  | 4072.166 |          |          |          |
| 0      | 0      | 0.002 | 100     | 0     | 25795.83 | 2218.149 | 6990.537 | 23328.39 |
| 0      | 94.636 | 0.077 | 66.5159 | 0     | 2506.231 | 1313.356 | 1731.909 | 1911.571 |
| 0      | 0      | 0.113 | 51.0571 | 0     | 9545.475 |          |          | 6438.607 |
| 0      | 100    | 0.019 | 100     | 0     | 1798.406 | 1050.62  | 1034.517 | 796.162  |
| 0      | 0      | 0.467 | 0       | 0     | 13223.63 | 2479.958 | 5804.766 | 7132.268 |
| 0      | 99.835 | 0.062 | 77.0687 | 287   | 3028.274 | 839.518  | 1507.126 | 3258.498 |
| 4.495  | 39.447 | 0.407 | 18.0434 | 489   | 2415.093 | 619.003  | 897.336  | 1885.008 |
| 0      | 100    | 0     | 100     | 0     |          |          |          |          |

|        |        |       |         |      |          |          |          |          |
|--------|--------|-------|---------|------|----------|----------|----------|----------|
| 0      | 0      | 0.035 | 95.8615 | 0    | 30532.31 | 3452.898 | 7316.275 | 21551.34 |
| 0.543  | 0      | 0.461 | 11.4317 | 0    | 5826.672 | 1719.611 | 5862.488 | 4662.057 |
| 0.01   | 0      | 0.456 | 2.58288 | 0    |          | 1363.606 | 4315.305 | 1221.224 |
| 9.086  | 0      | 0.04  | 93.2095 | 0    | 28929.43 |          |          |          |
| 0.709  | 0      | 0.052 | 90.3822 | 0    | 23857.94 | 2817.303 | 10147.87 | 16925.59 |
| 0      | 0      | 0.058 | 80.9226 | 0    | 24994.66 | 3501.9   | 10741.87 | 18773.57 |
| 0      | 100    | 0.012 | 100     | 0    | 3650.39  | 1326.785 | 3844.877 | 3598.21  |
| 15.332 | 0      | 0.189 | 16.2407 | 0    | 3846.694 | 1663.149 | 2582.962 | 4088.574 |
| 0      | 0.006  | 0.032 | 97.7372 | 0    | 26219.79 | 1920.721 | 11343.78 | 20742.39 |
| 9.747  | 0      | 2.206 | 0       | 0    | 4594.435 |          |          | 5648.025 |
| 11.629 | 51.028 | 0.409 | 9.38789 | 0    | 1018.731 | 650.601  | 941.848  | 1030.687 |
| 0      | 0      | 1.918 | 0       | 0    | 1560     |          |          | 2167.491 |
| 0      | 100    | 0.17  | 25.378  | 0    | 1859.063 | 481.977  | 579.707  | 1141     |
| 0      | 100    | 0     | 100     | 0    |          |          |          |          |
| 0      | 100    | 0.001 | 100     | 0    | 11224.7  |          |          |          |
| 0      | 0      | 0.042 | 95.0484 | 0    | 16172.41 | 853.89   | 3161.702 | 14219.08 |
| 0      | 0      | 0.04  | 98.6018 | 0    | 15958.92 | 28878.14 | 18161.66 | 10082.73 |
| 0      | 54.794 | 0.267 | 6.8206  | 0    | 1569.901 | 612.943  | 783.584  | 1203.223 |
| 0      | 0      | 0.027 | 100     | 0    | 4216.305 | 2428.74  | 3461.337 | 3405.22  |
| 0      | 100    | 0.096 | 54.5897 | 9901 |          | 1054.759 | 1247.827 | 990.059  |
| 48.242 | 0      | 0.501 | 9.92269 | 0    |          | 857.168  | 5515.242 | 2312.993 |
| 0      | 100    | 0.002 | 100     | 0    | 5620.647 |          |          |          |
| 0      | 0      | 0.305 | 0       | 0    |          |          |          |          |
| 0      | 100    | 0.035 | 100     | 0    | 3625.534 | 1252.871 | 1540.745 | 3633.984 |
| 0      | 0      | 0.246 | 0       | 308  | 2122.544 | 355.366  | 714.936  | 1490.346 |
| 0      | 0      | 0.256 | 13.8029 | 0    | 8767.231 |          |          | 6346.336 |
| 0      | 0      | 0.259 | 0       | 0    | 57792.09 |          |          |          |
| 0      | 0      | 0.265 | 15.7566 | 0    | 7903.728 |          |          | 7693.585 |
| 0      | 0      | 0     | 100     | 0    | 18581.94 |          |          |          |
| 0.614  | 0      | 0.164 | 35.4198 | 0    | 3513.834 | 1455.361 | 1830.967 | 2657.562 |
| 0      | 0      | 0     | 100     | 0    |          |          |          |          |
| 0      | 0      | 0.197 | 11.0077 | 0    | 1331.461 |          |          | 2127.236 |
| 0      | 65.224 | 0.087 | 61.0618 | 0    | 825.244  | 951.01   | 1126.29  | 705.899  |
| 0      | 100    | 0     | 100     | 0    |          |          |          |          |
| 1.704  | 27.928 | 0.183 | 38.4165 | 0    | 9046.27  | 2365.019 | 5158.34  | 7274.678 |
| 0      | 100    | 0     | 100     | 0    |          |          |          |          |
| 0      | 0      | 0.135 | 14.0538 | 0    | 6059.698 |          |          | 3340.784 |
| 26.132 | 11.688 | 1.014 | 0       | 0    | 779.597  | 456.875  | 612.963  | 891.656  |
| 0      | 0      | 0.002 | 100     | 0    | 18255.73 |          |          |          |
| 0      | 50.245 | 0.287 | 30.3948 | 0    |          | 395.686  | 662.868  | 1376.179 |
| 1.49   | 0      | 1.694 | 0       | 0    | 1620.436 | 435.422  | 912.424  | 1084.652 |
| 0      | 100    | 0     | 100     | 0    |          |          |          |          |
| 0      | 87.365 | 0.21  | 30.756  | 0    | 876.868  | 1133.42  | 1403.62  | 1364.891 |
| 74.857 | 0      | 0.511 | 5.9946  | 0    | 1729.208 | 463.918  | 961.991  | 1016.92  |
| 0      | 100    | 0     | 100     | 0    |          |          |          |          |
| 0      | 100    | 0.003 | 100     | 0    |          |          |          |          |
| 0      | 100    | 0.006 | 100     | 0    | 9622.512 | 2489.759 | 3969.069 | 10652.32 |
| 0      | 39.224 | 0.496 | 0       | 0    | 586.252  | 324.056  | 591.72   | 656.235  |
| 0      | 100    | 0.057 | 83.2625 | 0    | 8926.452 | 1559.265 | 2648.422 | 8165.59  |
| 0      | 100    | 0.002 | 100     | 0    |          |          |          |          |

|        |        |       |         |        |          |          |          |          |
|--------|--------|-------|---------|--------|----------|----------|----------|----------|
| 13.861 | 0      | 0.305 | 17.6842 | 55728  | 6057.856 | 2159.705 | 3333.925 | 3637.062 |
| 0      | 94.292 | 0.008 | 100     | 0      | 22140    |          |          |          |
| 39.21  | 0.032  | 1.186 | 0       | 0      | 703.141  | 617.031  | 658.875  | 486.397  |
| 0      | 0      | 0     | 100     | 0      |          |          |          |          |
| 0      | 73.44  | 0.491 | 9.17532 | 0      | 882.59   | 752.681  | 1416.623 | 1251.178 |
| 0      | 100    | 0.077 | 65.2217 | 0      | 3277.64  | 1615.788 | 3128.881 | 1520.552 |
| 0      | 100    | 0     | 100     | 0      |          |          |          |          |
| 0      | 0      | 0.042 | 91.6192 | 0      | 28610.12 | 5996.128 | 13373.63 | 22161.45 |
| 0      | 0      | 0.053 | 79.6415 | 0      | 34207.82 | 5429.51  | 12271.32 | 25101.95 |
| 0      | 0      | 0.697 | 0       | 0      | 1322.873 | 496.334  | 641.508  | 999.145  |
| 0      | 100    | 0     | 100     | 0      |          |          |          |          |
| 0      | 0      | 0.039 | 95.685  | 0      | 19614.94 | 8455.649 | 12488.61 | 16170.12 |
| 19.027 | 0      | 0.113 | 47.7134 | 0      | 12729.71 | 623.095  | 4267.115 | 7115.765 |
| 11.184 | 0      | 0.589 | 11.0758 | 0      | 1925.391 | 643.02   | 977.667  | 1815.145 |
| 0      | 100    | 0.018 | 100     | 0      | 6164.348 | 1915.962 | 4198.462 | 5675.752 |
| 0      | 100    | 0     | 100     | 0      |          |          |          |          |
| 0.54   | 55.788 | 0.325 | 16.7165 | 0      | 4722.525 | 2307.632 | 4325.977 | 3832.72  |
| 0      | 98.973 | 0.02  | 100     | 0      | 4027.548 | 1070.263 | 2033.298 | 2421.199 |
| 0      | 100    | 0     | 100     | 0      |          |          |          |          |
| 0      | 100    | 0.071 | 71.2843 | 0      | 2325.738 |          |          |          |
| 0      | 0      | 0.283 | 14.8703 | 0      | 10401.36 | 2446.893 | 5807.87  | 7308.837 |
| 0      | 100    | 0.012 | 100     | 0      | 22242.23 | 2143.823 | 6946.214 | 14105.68 |
| 0      | 0      | 0.064 | 80.0171 | 0      |          | 853.857  | 2840.967 | 1169.178 |
| 0      | 0      | 0.072 | 70.0621 | 0      | 18255.28 | 2086.406 | 6517.205 | 13813.43 |
| 0      | 57.034 | 0.847 | 0       | 0      | 4553.069 | 1584.366 | 2220.024 | 3013.877 |
| 0      | 0      | 0.046 | 100     | 0      |          | 949.299  | 2329.271 | 5124.096 |
| 0      | 96.819 | 0.001 | 100     | 0      | 24538.31 |          |          |          |
| 1.782  | 0      | 0.015 | 100     | 0      |          | 30387.13 | 35198.26 | 8290.317 |
| 0      | 58.336 | 0.008 | 100     | 0      |          | 1989.306 | 3821.115 | 4588.492 |
| 0      | 0      | 0.367 | 6.7651  | 0      | 5889.324 | 1181.952 | 3761.37  | 3005.54  |
| 0.056  | 0      | 1.841 | 2.76605 | 205550 | 7095.689 |          |          | 5276.657 |
| 0      | 68.88  | 0.946 | 0       | 0      | 1039.172 | 546.902  | 805.649  | 818.696  |
| 37.258 | 0      | 0.304 | 13.6641 | 0      | 12374.11 | 2230.766 | 11787.04 | 7647.705 |
| 0      | 0      | 0.236 | 11.654  | 0      |          |          |          | 2313.608 |
| 2.16   | 20.679 | 0.917 | 2.92113 | 0      | 1682.674 | 820.837  | 910.048  | 991.254  |
| 0      | 34.999 | 0.165 | 32.4713 | 0      | 1435.082 | 1258.898 | 1396.079 | 1358.175 |
| 0      | 100    | 0.003 | 100     | 0      | 23611.61 | 2218.961 | 6430.213 | 22518.17 |
| 0      | 0      | 0.001 | 100     | 0      |          |          |          |          |
| 0      | 0      | 0.276 | 13.7615 | 0      |          |          |          |          |
| 0      | 100    | 0.003 | 100     | 0      | 1862.47  |          |          |          |
| 0      | 100    | 0.1   | 51.5546 | 16819  | 466.647  | 656.268  | 1125.709 | 409.872  |
| 0      | 100    | 0.039 | 99.6575 | 0      | 4594.274 | 1488.813 | 2503.697 | 2715.551 |
| 0      | 0      | 0.025 | 100     | 0      |          |          |          |          |
| 3.358  | 0      | 0.126 | 44.7664 | 0      |          | 1056.633 | 1201.617 | 863.075  |
| 0      | 0      | 0.001 | 100     | 0      |          |          |          |          |
| 0      | 100    | 0.004 | 100     | 0      |          | 820.358  | 1421.447 | 1225.896 |
| 0      | 100    | 0.191 | 25.757  | 0      |          |          |          |          |
| 0      | 0      | 0.554 | 0       | 0      | 11303.75 |          |          | 8219.698 |
| 0      | 0      | 0.091 | 61.6056 | 0      | 16873.33 |          |          | 12876.63 |
| 0      | 0      | 0.223 | 21.2438 | 0      | 25899.88 | 6739.231 | 14183.35 | 20709.99 |

|        |        |       |         |        |          |          |          |          |
|--------|--------|-------|---------|--------|----------|----------|----------|----------|
| 0      | 2.876  | 0.113 | 36.2172 | 426    | 4681.445 | 721.089  | 2461.908 | 2630.322 |
| 0      | 100    | 0     | 100     | 0      | 17957.47 | 1912.258 | 3250.874 | 6353.528 |
| 3.445  | 0      | 0.244 | 16.7091 | 0      | 3242.195 | 2408.502 | 5570.152 | 7368.301 |
| 0      | 100    | 0.001 | 100     | 0      |          |          |          |          |
| 21.72  | 13.413 | 1.254 | 0       | 0      | 821.15   | 475.502  | 550.5    | 428.787  |
| 0      | 100    | 0.263 | 16.778  | 0      | 1436.855 | 573.994  | 1055.553 | 614.222  |
| 0      | 99.546 | 0.193 | 29.3876 | 0      | 6279.51  | 817.049  | 1958.72  | 6397.871 |
| 0.025  | 0      | 1.505 | 0       | 0      | 785.469  |          |          | 883.162  |
| 0      | 100    | 0     | 100     | 0      |          |          |          |          |
| 55.087 | 0      | 1.286 | 0       | 0      | 3667.555 |          |          | 2324.556 |
| 0      | 100    | 0.013 | 100     | 0      |          |          |          |          |
| 0      | 100    | 0     | 100     | 0      | 6568.724 |          |          |          |
| 0      | 100    | 0.008 | 100     | 0      | 8969.766 | 3674.051 | 9117.805 | 13681.76 |
| 20.664 | 0      | 0.114 | 48.8258 | 0      | 6251.551 | 1114.596 | 2446.059 | 4552.262 |
| 0      | 0      | 0.152 | 38.9877 | 0      | 6510.354 | 1622.933 | 3894.789 | 6609.014 |
| 0      | 100    | 0     | 100     | 0      |          |          |          |          |
| 0      | 8.846  | 0.023 | 100     | 0      |          | 924.393  | 3958.396 | 16858.58 |
| 0      | 88.294 | 0.42  | 10.2759 | 9035   | 521.827  | 423.714  | 600.268  | 535.125  |
| 0.02   | 97.783 | 0.909 | 0       | 0      | 1243.514 | 686.854  | 784.287  | 796.523  |
| 0      | 0      | 0.365 | 13.6144 | 0      | 4108.69  |          |          | 2745.334 |
| 0      | 100    | 0     | 100     | 0      |          |          |          |          |
| 0      | 0      | 0.142 | 37.4727 | 0      | 8781.518 | 4659.398 | 5421.178 | 7883.267 |
| 0.278  | 0.358  | 0.677 | 13.1656 | 0      | 33970.17 | 9561.348 | 16283.63 | 28448.85 |
| 32.152 | 0      | 1.645 | 0       | 0      | 1515.708 |          |          | 3478.961 |
| 0      | 0      | 0.02  | 100     | 0      |          |          |          |          |
| 0      | 100    | 0.001 | 100     | 0      | 5334.509 |          |          |          |
| 0      | 96.752 | 0.306 | 25.2528 | 5124   | 5685.12  | 7461.959 | 10471.65 | 8414.729 |
| 0      | 100    | 0     | 100     | 0      |          |          |          |          |
| 0      | 100    | 0.001 | 100     | 0      |          |          |          |          |
| 0      | 56.535 | 0.112 | 57.8169 | 0      | 2011.743 | 658.076  | 709.929  | 1808.773 |
| 0      | 100    | 0.002 | 100     | 0      | 3172.14  |          |          |          |
| 0      | 100    | 0     | 100     | 0      |          |          |          |          |
| 0      | 100    | 0.003 | 100     | 0      | 4860.269 |          |          |          |
| 10.75  | 0      | 0.148 | 38.1163 | 0      | 787.749  | 911.231  | 1783.548 | 2619.284 |
| 4.386  | 0.179  | 0.306 | 18.9404 | 144785 | 9419.122 | 2534.946 | 4270.851 | 3978.219 |
| 0      | 17.132 | 0.9   | 0       | 0      | 774.01   | 660.91   | 1040.744 | 645.375  |
| 0      | 8.401  | 0.499 | 0       | 898    | 2499.215 | 700.979  | 1401.811 | 1327.85  |

desert tropical dist\_coast near\_coast gemstones rgdppc\_20 rgdppc\_19 rgdppc\_19 rgdppc\_20  
2.77

1,000 ha

calculate the average uphi

he basis of the FAO/UNESCO Digital Soil Map of the World and linked soil association composition tal





36,885





% doesnt really work as need better calc

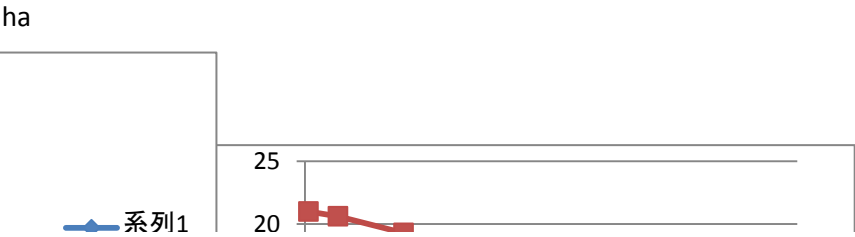

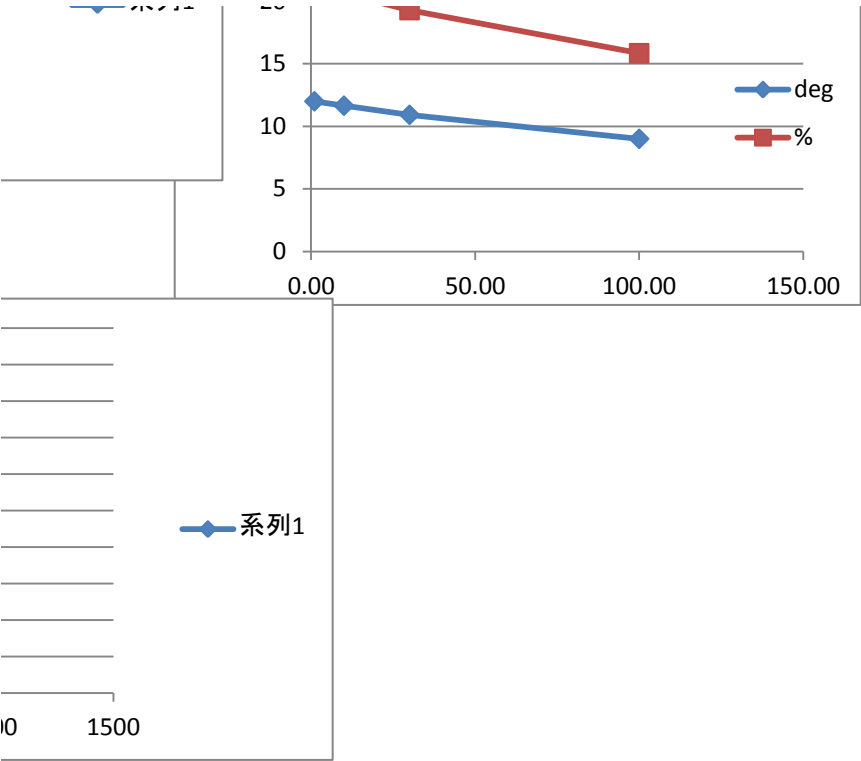

0.154% extra surface.

|          |          |            |           |        |
|----------|----------|------------|-----------|--------|
| sum      | sec      | Hypotenuse | True area | diff % |
| 0.038914 | 1.000758 | 3.88       | 15.0114   | 0.08   |

|            |           |        |
|------------|-----------|--------|
| Hypotenuse | True area | diff % |
| 0.00       | 0.0000    | 0.01   |
| 0.26       | 0.0654    | 0.27   |
| 0.35       | 0.1247    | 0.03   |
| 0.00       | 0.0000    | 0.00   |
| 0.05       | 0.0028    | 0.54   |
| 0.01       | 0.0000    | 1.57   |
| 0.01       | 0.0001    | 0.00   |
| 0.09       | 0.0084    | 0.02   |
| 0.52       | 0.2737    | 0.03   |
| 0.05       | 0.0028    | 0.33   |
| 0.00       | 0.0000    | 0.25   |
| 0.01       | 0.0000    | 0.00   |
| 0.88       | 0.7682    | 0.00   |
| 0.09       | 0.0083    | 0.61   |
| 0.09       | 0.0083    | 0.13   |
| 0.05       | 0.0026    | 0.11   |
| 0.05       | 0.0030    | 0.01   |
| 0.11       | 0.0111    | 0.00   |
| 0.17       | 0.0274    | 0.00   |
| 0.11       | 0.0130    | 0.00   |
| 0.11       | 0.0111    | 0.10   |
| 0.01       | 0.0001    | 0.00   |
| 0.03       | 0.0010    | 0.00   |
| 0.07       | 0.0051    | 0.25   |
| 0.14       | 0.0207    | 0.00   |
| 0.05       | 0.0023    | 0.01   |
| 0.00       | 0.0000    | 0.00   |
| 0.33       | 0.1085    | 0.03   |
| 0.92       | 0.8460    | 0.00   |
| 0.01       | 0.0000    | 0.03   |
| 0.02       | 0.0005    | 0.01   |
| 0.07       | 0.0048    | 1.85   |
| 0.24       | 0.0567    | 0.00   |
| 0.25       | 0.0623    | 0.00   |
| 0.95       | 0.9097    | 0.04   |
| 0.00       | 0.0000    | 0.00   |
| 0.06       | 0.0040    | 1.12   |

|      |        |      |
|------|--------|------|
| 0.27 | 0.0751 | 0.27 |
| 0.97 | 0.9342 | 0.15 |
| 0.18 | 0.0318 | 0.00 |
| 0.22 | 0.0465 | 0.01 |
| 0.48 | 0.2267 | 0.01 |
| 0.18 | 0.0342 | 0.00 |
| 0.00 | 0.0000 | 0.03 |
| 0.33 | 0.1110 | 0.03 |
| 0.01 | 0.0002 | 0.41 |
| 0.02 | 0.0004 | 0.21 |
| 0.07 | 0.0051 | 0.16 |
| 0.10 | 0.0110 | 0.01 |
| 0.00 | 0.0000 | 0.06 |
| 0.01 | 0.0000 | 0.00 |
| 0.03 | 0.0009 | 0.31 |
| 0.09 | 0.0077 | 0.04 |
| 0.19 | 0.0349 | 0.02 |
| 0.05 | 0.0023 | 0.21 |
| 0.01 | 0.0001 | 0.00 |
| 0.07 | 0.0042 | 0.00 |
| 0.07 | 0.0048 | 0.10 |
| 0.49 | 0.2382 | 0.01 |
| 0.17 | 0.0277 | 0.06 |
| 0.32 | 0.0996 | 0.02 |
| 0.10 | 0.0101 | 0.22 |
| 0.16 | 0.0266 | 0.00 |
| 0.22 | 0.0500 | 0.13 |
| 0.07 | 0.0042 | 0.00 |
| 0.32 | 0.1001 | 0.09 |
| 0.17 | 0.0305 | 0.01 |
| 0.04 | 0.0018 | 0.07 |
| 0.03 | 0.0012 | 0.00 |
| 0.23 | 0.0550 | 0.06 |
| 0.01 | 0.0001 | 0.34 |
| 0.01 | 0.0001 | 0.07 |
| 0.16 | 0.0258 | 0.00 |
| 0.16 | 0.0243 | 0.02 |
| 0.08 | 0.0070 | 0.63 |
| 0.15 | 0.0228 | 0.00 |
| 0.00 | 0.0000 | 2.27 |
| 0.16 | 0.0246 | 0.02 |
| 0.01 | 0.0002 | 0.05 |
| 0.03 | 0.0010 | 0.00 |
| 0.05 | 0.0028 | 0.01 |
| 0.05 | 0.0028 | 0.01 |
| 0.11 | 0.0129 | 0.42 |
| 0.01 | 0.0000 | 0.16 |
| 0.47 | 0.2175 | 0.01 |
| 0.10 | 0.0109 | 0.12 |
| 0.09 | 0.0088 | 0.00 |

|      |        |      |
|------|--------|------|
| 0.01 | 0.0001 | 0.02 |
| 0.14 | 0.0197 | 0.00 |
| 0.01 | 0.0001 | 0.22 |
| 0.11 | 0.0112 | 0.17 |
| 0.07 | 0.0056 | 0.07 |
| 0.05 | 0.0028 | 0.21 |
| 0.09 | 0.0090 | 0.01 |
| 0.43 | 0.1812 | 0.03 |
| 0.55 | 0.2974 | 0.04 |
| 0.00 | 0.0000 | 0.00 |
| 0.08 | 0.0069 | 0.01 |
| 0.40 | 0.1632 | 0.24 |
| 0.21 | 0.0437 | 0.02 |
| 0.10 | 0.0100 | 0.14 |
| 0.05 | 0.0022 | 0.12 |
| 0.17 | 0.0295 | 0.28 |
| 0.03 | 0.0011 | 0.12 |
| 0.09 | 0.0088 | 0.05 |
| 0.19 | 0.0365 | 0.20 |
| 0.52 | 0.2700 | 0.01 |
| 0.24 | 0.0569 | 0.02 |
| 0.14 | 0.0193 | 0.85 |
| 0.13 | 0.0177 | 0.01 |
| 0.01 | 0.0001 | 0.00 |
| 0.01 | 0.0000 | 0.00 |
| 0.10 | 0.0099 | 0.17 |
| 0.04 | 0.0018 | 0.00 |
| 0.15 | 0.0231 | 0.24 |
| 0.03 | 0.0010 | 0.72 |
| 0.10 | 0.0096 | 0.00 |
| 0.42 | 0.1760 | 0.01 |
| 0.01 | 0.0001 | 0.17 |
| 0.00 | 0.0000 | 1.46 |
| 0.08 | 0.0065 | 0.01 |
| 0.06 | 0.0031 | 1.54 |
| 0.08 | 0.0063 | 0.00 |
| 0.02 | 0.0003 | 0.04 |
| 0.08 | 0.0062 | 0.00 |
| 0.00 | 0.0000 | 0.02 |
| 0.21 | 0.0447 | 0.23 |
| 0.00 | 0.0000 | 0.00 |
| 0.06 | 0.0033 | 0.03 |
| 0.24 | 0.0582 | 0.05 |
| 0.01 | 0.0000 | 0.00 |
| 0.44 | 0.1946 | 0.11 |
| 0.00 | 0.0000 | 0.00 |
| 0.05 | 0.0026 | 0.33 |
| 0.35 | 0.1220 | 0.00 |
| 0.01 | 0.0000 | 0.09 |
| 0.26 | 0.0659 | 0.15 |

|      |        |      |
|------|--------|------|
| 0.40 | 0.1567 | 0.06 |
| 0.01 | 0.0000 | 0.10 |
| 0.28 | 0.0786 | 0.01 |
| 0.32 | 0.1031 | 0.00 |
| 0.00 | 0.0000 | 0.43 |
| 0.01 | 0.0001 | 0.05 |
| 0.01 | 0.0002 | 0.03 |
| 0.10 | 0.0094 | 0.04 |
| 0.18 | 0.0329 | 0.04 |
| 0.01 | 0.0000 | 0.17 |
| 0.29 | 0.0824 | 0.03 |
| 0.04 | 0.0018 | 0.09 |
| 0.36 | 0.1267 | 0.00 |
| 0.00 | 0.0000 | 0.05 |
| 0.30 | 0.0911 | 0.00 |
| 0.11 | 0.0121 | 0.04 |
| 0.01 | 0.0000 | 0.00 |
| 0.06 | 0.0034 | 0.00 |
| 0.18 | 0.0305 | 0.36 |
| 0.12 | 0.0144 | 1.04 |
| 0.00 | 0.0000 | 0.00 |
| 0.16 | 0.0268 | 0.19 |
| 0.18 | 0.0310 | 0.05 |
| 0.28 | 0.0772 | 0.16 |
| 0.09 | 0.0074 | 0.09 |
| 0.00 | 0.0000 | 0.01 |
| 0.36 | 0.1281 | 0.07 |
| 0.17 | 0.0299 | 0.15 |
| 0.01 | 0.0000 | 0.01 |
| 0.21 | 0.0453 | 0.09 |
| 0.17 | 0.0304 | 0.00 |
| 0.03 | 0.0009 | 0.08 |
| 0.11 | 0.0121 | 0.29 |
| 0.10 | 0.0092 | 0.08 |
| 0.20 | 0.0397 | 0.00 |
| 0.02 | 0.0006 | 0.31 |
| 0.02 | 0.0004 | 0.16 |
| 0.03 | 0.0011 | 0.00 |
| 0.02 | 0.0003 | 0.57 |
| 0.15 | 0.0230 | 0.08 |
| 1.28 | 1.6390 | 0.05 |
| 0.05 | 0.0025 | 0.38 |
| 0.46 | 0.2150 | 0.03 |
| 0.10 | 0.0102 | 0.13 |
| 0.49 | 0.2376 | 0.01 |
| 0.14 | 0.0193 | 0.00 |
| 0.01 | 0.0001 | 0.00 |
| 0.01 | 0.0000 | 0.62 |
| 0.00 | 0.0000 | 0.00 |
| 0.05 | 0.0028 | 0.08 |

|      |        |      |
|------|--------|------|
| 0.08 | 0.0072 | 0.01 |
| 0.05 | 0.0021 | 0.11 |
| 0.00 | 0.0000 | 0.15 |
| 0.25 | 0.0627 | 0.01 |
| 0.00 | 0.0000 | 0.03 |
| 0.01 | 0.0001 | 0.18 |
| 0.12 | 0.0156 | 0.00 |
| 0.07 | 0.0048 | 0.13 |
| 0.05 | 0.0020 | 0.30 |
| 0.20 | 0.0410 | 0.03 |
| 0.04 | 0.0017 | 0.37 |
| 0.01 | 0.0000 | 0.62 |
| 0.14 | 0.0184 | 0.02 |
| 0.01 | 0.0000 | 0.00 |
| 0.35 | 0.1259 | 0.01 |
| 0.07 | 0.0054 | 0.00 |
| 0.23 | 0.0511 | 0.04 |
| 0.12 | 0.0142 | 1.27 |
| 0.00 | 0.0000 | 0.00 |
| 0.22 | 0.0470 | 0.00 |
| 0.04 | 0.0015 | 0.12 |
| 0.01 | 0.0001 | 0.02 |
| 0.02 | 0.0005 | 0.01 |
| 0.12 | 0.0155 | 0.02 |
| 0.28 | 0.0772 | 0.30 |
| 0.00 | 0.0000 | 0.00 |
| 0.06 | 0.0036 | 0.48 |
| 0.30 | 0.0886 | 0.02 |
| 0.14 | 0.0197 | 0.03 |
| 0.24 | 0.0579 | 0.01 |
| 0.00 | 0.0000 | 0.00 |
| 0.13 | 0.0175 | 0.01 |
| 0.96 | 0.9167 | 0.06 |
| 0.21 | 0.0425 | 0.01 |
| 0.00 | 0.0000 | 0.00 |
| 0.01 | 0.0000 | 0.35 |
| 0.30 | 0.0882 | 0.01 |
| 0.00 | 0.0000 | 0.05 |
| 0.01 | 0.0000 | 0.07 |
| 0.18 | 0.0312 | 0.16 |
| 0.03 | 0.0012 | 0.11 |
| 0.00 | 0.0000 | 0.06 |
| 0.02 | 0.0003 | 0.11 |
| 0.23 | 0.0529 | 0.19 |
| 0.35 | 0.1216 | 0.12 |
| 0.27 | 0.0743 | 0.01 |
| 0.20 | 0.0387 | 0.05 |

**13.202**      **0.154** %

Hypotenus True area    diff %

14.81718



|        |        |                |
|--------|--------|----------------|
| 15.000 | 15.000 |                |
|        | 0.023  |                |
| 15.000 | 15.023 | <b>0.154</b> % |

D, BUT THE SCALE IS ONLY 1KM!!!  
 exponention inceases.

But... 0.154 may be 4 times under so = **0.616** %

| O <sub>2</sub> /m <sup>2</sup> /y<br>t | Total<br>O <sub>2</sub> /yr Gt |
|----------------------------------------|--------------------------------|
| 3.84                                   | 57.6                           |
| 2.064                                  | 74.304                         |
|                                        | 131.904                        |

|   |     |
|---|-----|
| % |     |
|   | 44  |
|   | 56  |
|   | 100 |

is reasonable; the tortuosity data are for soil only which is about 12 Gha or 80%.  
rain, tortuosity and relief Gha % difference x inc

(B) mean r (C) mean c (D) mean mm (n=5) %

21.3 94.0 108.2  
18.2  
14.6  
3.6

23.9 49.7

28.3 59.0

27.0 52.8

31.9 62.6

252 3.5

317 4.2

Gha ocean =

88.8

98.6 Gha

Mean

soil

sea

tot

57.7

36

93.7

could be increased to 100 Gha.

BY 80% for soil

61.824

67.888 Doesnt work!

to 1

so

72:36 = 2:1

;) )

..\*\*

3 Gha to total for land area.

however, aquatic productivity and biomass based on phytoplankton is often measured in  $\mu\text{g}/\text{cm}^2$  and p  
seals, all semi-terrestrial plus some plants and invertebrates.

for microbes.

Gha







[/onlinelibrary.wiley.com/doi/10.1890/1051-0761\(2000\)010%5b0423:TVDOS0%5d2.0.CO;2/full](https://onlinelibrary.wiley.com/doi/10.1890/1051-0761(2000)010%5b0423:TVDOS0%5d2.0.CO;2/full)

| Land | ocean | Total | % Land | % diff land |
|------|-------|-------|--------|-------------|
| 15   | 36    | 51    | 29.4   | 0.0         |
| 30   | 36    | 66    | 45.5   | 50.0        |
| 60   | 36    | 96    | 62.5   | 75.0        |
| 64   | 36    | 100   | 64.0   | 76.6        |

| Land | ocean | Total | % Land | % diff land Roughly |
|------|-------|-------|--------|---------------------|
| 15   | 36    | 51    | 29.4   | 0.0 Flat            |
| 16.5 | 36    | 52.5  | 31.4   | 9.1 Macro 10%       |
| 33   | 36    | 69    | 47.8   | 54.5 Meso 100%      |
| 64   | 36    | 100   | 64.0   | 76.6 Micro 90%      |

4,690

4,765 Gt SOC or about double!!!







Expect

|   |          | 0 plus 1 | cos      |
|---|----------|----------|----------|
| 1 | -2.96998 | -1.96998 | -1.22152 |
| 1 | 0        | 1        | 1.698093 |
| 1 | -0.5403  | 0.459698 | 2.816587 |
| 1 | 0        | 1        | 1.698093 |
| 1 | 0        | 1        | 1.698093 |
| 1 | 0        | 1        | 1.698093 |
| 1 | 0.414214 | 1.414214 | 0.490109 |
| 1 | 0        | 1        | 1.698093 |
| 1 | 0.414214 | 1.414214 | 0.490109 |
| 1 | 0        | 1        | 1.698093 |
| 1 | 1.236068 | 2.236068 | -1.94    |
| 1 | 0        | 1        | 1.698093 |
| 1 | 0.414214 | 1.414214 | 0.490109 |
| 1 | 0        | 1        | 1.698093 |
| 1 | 2.162278 | 3.162278 | -3.14218 |
| 1 | 0        | 1        | 1.698093 |
| 1 | 0.414214 | 1.414214 | 0.490109 |
| 1 | 0        | 1        | 1.698093 |
| 1 | 0        | 1        | 1.698093 |
| 1 | 0        | 1        | 1.698093 |
| 1 | 0        | 1        | 1.698093 |
| 1 | 0        | 1        | 1.698093 |
| 1 | 1.236068 | 2.236068 | -1.94    |
| 1 | 0        | 1        | 1.698093 |
| 1 | 1.236068 | 2.236068 | -1.94    |
| 1 | 0        | 1        | 1.698093 |
| 1 | 0.414214 | 1.414214 | 0.490109 |

3.142857

|   |          |          |          |
|---|----------|----------|----------|
| 1 | 0        | 1        | 1.698093 |
| 1 | 0.414214 | 1.414214 | 0.490109 |
| 1 | 0        | 1        | 1.698093 |
| 1 | 0.414214 | 1.414214 | 0.490109 |
| 1 | 0        | 1        | 1.698093 |
| 1 | 0.414214 | 1.414214 | 0.490109 |
| 1 | 0        | 1        | 1.698093 |
| 1 | 1.236068 | 2.236068 | -1.94    |
| 1 | 0        | 1        | 1.698093 |
| 1 | 0.414214 | 1.414214 | 0.490109 |
| 1 | 0        | 1        | 1.698093 |
| 1 | 0.414214 | 1.414214 | 0.490109 |
| 1 | 0        | 1        | 1.698093 |
| 1 | 1.236068 | 2.236068 | -1.94    |
| 1 | 0        | 1        | 1.698093 |
| 1 | 3.123106 | 4.123106 | -1.74669 |
| 1 | 0        | 1        | 1.698093 |
| 1 | 3.123106 | 4.123106 | -1.74669 |
| 1 | 0        | 1        | 1.698093 |
| 1 | 0        | 1        | 1.698093 |
| 1 | 0        | 1        | 1.698093 |
| 1 | 0.414214 | 1.414214 | 0.490109 |
| 1 | 0        | 1        | 1.698093 |
| 1 | 0.414214 | 1.414214 | 0.490109 |
| 1 | 0        | 1        | 1.698093 |
| 1 | 0        | 1        | 1.698093 |
| 1 | 0        | 1        | 1.698093 |
| 1 | 0.414214 | 1.414214 | 0.490109 |
| 1 | 0        | 1        | 1.698093 |
| 1 | 0.414214 | 1.414214 | 0.490109 |
| 1 | 0        | 1        | 1.698093 |
| 1 | 0        | 1        | 1.698093 |
| 1 | 0        | 1        | 1.698093 |
| 1 | 1.236068 | 2.236068 | -1.94    |
| 1 | 0        | 1        | 1.698093 |
| 1 | 0.414214 | 1.414214 | 0.490109 |
| 1 | 0        | 1        | 1.698093 |
| 1 | 0        | 1        | 1.698093 |
| 1 | 0        | 1        | 1.698093 |
| 1 | 0        | 1        | 1.698093 |
| 1 | 0        | 1        | 1.698093 |
| 1 | 0        | 1        | 1.698093 |
| 1 | 0        | 1        | 1.698093 |
| 1 | 0        | 1        | 1.698093 |
| 1 | 3.123106 | 4.123106 | -1.74669 |
| 1 | 0        | 1        | 1.698093 |
| 1 | 0        | 1        | 1.698093 |
| 1 | 0        | 1        | 1.698093 |
| 1 | 1.236068 | 2.236068 | -1.94    |
| 1 | 0        | 1        | 1.698093 |
| 1 | 1.236068 | 2.236068 | -1.94    |
| 1 | 0        | 1        | 1.698093 |
| 1 | 1.236068 | 2.236068 | -1.94    |
| 1 | 0        | 1        | 1.698093 |
| 1 | 0        | 1        | 1.698093 |
| 1 | 0        | 1        | 1.698093 |
| 1 | 0.414214 | 1.414214 | 0.490109 |

|   |          |          |          |
|---|----------|----------|----------|
| 1 | 0        | 1        | 1.698093 |
| 1 | 3.123106 | 4.123106 | -1.74669 |
| 1 | 0        | 1        | 1.698093 |
| 1 | 0.414214 | 1.414214 | 0.490109 |
| 1 | 0        | 1        | 1.698093 |
| 1 | 0        | 1        | 1.698093 |
| 1 | 0        | 1        | 1.698093 |
| 1 | 0        | 1        | 1.698093 |
| 1 | 0        | 1        | 1.698093 |
| 1 | 1.236068 | 2.236068 | -1.94    |
| 1 | 0        | 1        | 1.698093 |
| 1 | 1.236068 | 2.236068 | -1.94    |

Total length = hypoteneuse

30.95437 126.0411

Total base = base

89

Since  $a^2 + b^2 = c^2$ , then  $b^2 = c^2 - a^2$

$c^2 - a^2$

$c^2$  15886.37

$a^2$  7921

$c^2 - a^2$  7965.37

sq rt = b 89.24892

a + b = 178.2489

T index= 2.002797

| rgdppc_19 | q_rule_law | cont_africa | cont_asia | cont_euro | cont_ocea | cont_north | cont_south | legor_gbr |
|-----------|------------|-------------|-----------|-----------|-----------|------------|------------|-----------|
|           |            | 0           | 0         | 0         | 0         | 1          | 0          | 0         |
| 679.791   | -1.687     | 0           | 1         | 0         | 0         | 0          | 0          | 0         |
| 1106.763  | -1.567     | 1           | 0         | 0         | 0         | 0          | 0          | 0         |
|           |            | 0           | 0         | 0         | 0         | 1          | 0          |           |
| 1931.784  | -0.82      | 0           | 0         | 1         | 0         | 0          | 0          | 0         |
|           | 1.515      | 0           | 0         | 1         | 0         | 0          | 0          | 0         |
|           |            | 0           | 0         | 0         | 0         | 1          | 0          | 0         |
| 20119.99  | 0.913      | 0           | 1         | 0         | 0         | 0          | 0          | 1         |
| 6926.81   | 0.033      | 0           | 0         | 0         | 0         | 0          | 1          | 0         |
|           | -0.453     | 0           | 1         | 0         | 0         | 0          | 0          | 0         |
|           |            | 0           | 0         | 0         | 1         | 0          | 0          | 1         |
|           | 0.99       | 0           | 0         | 0         | 0         | 1          | 0          | 1         |
| 13184.23  | 1.773      | 0           | 0         | 0         | 1         | 0          | 0          | 1         |
| 11601.7   | 1.853      | 0           | 0         | 1         | 0         | 0          | 0          | 0         |
|           | -1.007     | 0           | 1         | 0         | 0         | 0          | 0          | 0         |
| 530.763   | -1.25      | 1           | 0         | 0         | 0         | 0          | 0          | 0         |
| 12223.31  | 1.413      | 0           | 0         | 1         | 0         | 0          | 0          | 0         |
| 1082.474  | -0.23      | 1           | 0         | 0         | 0         | 0          | 0          | 0         |
| 719.511   | -0.52      | 1           | 0         | 0         | 0         | 0          | 0          | 0         |
| 599.122   | -0.807     | 0           | 1         | 0         | 0         | 0          | 0          | 1         |
| 4567.501  | -0.16      | 0           | 0         | 1         | 0         | 0          | 0          | 0         |
| 3776.897  | 0.457      | 0           | 1         | 0         | 0         | 0          | 0          | 1         |
|           | 1.063      | 0           | 0         | 0         | 0         | 1          | 0          | 1         |
|           | -0.44      | 0           | 0         | 1         | 0         | 0          | 0          | 0         |
|           | -0.9       | 0           | 0         | 1         | 0         | 0          | 0          | 0         |
|           | 0.257      | 0           | 0         | 0         | 0         | 1          | 0          | 1         |
|           | 1.255      | 0           | 0         | 0         | 0         | 1          | 0          | 1         |
| 2153.277  | -0.327     | 0           | 0         | 0         | 0         | 0          | 1          | 0         |
| 3761.573  | -0.257     | 0           | 0         | 0         | 0         | 0          | 1          | 0         |
|           | 0.76       | 0           | 0         | 0         | 0         | 1          | 0          | 1         |
|           | 0.59       | 0           | 1         | 0         | 0         | 0          | 0          | 1         |
|           | -0.277     | 0           | 1         | 0         | 0         | 0          | 0          | 1         |
| 1631.317  | 0.58       | 1           | 0         | 0         | 0         | 0          | 0          | 1         |
| 757.838   | -1.07      | 1           | 0         | 0         | 0         | 0          | 0          | 0         |
| 14002.5   | 1.757      | 0           | 0         | 0         | 0         | 1          | 0          | 1         |
|           |            | 0           | 0         | 0         | 1         | 0          | 0          |           |
| 16696.84  | 2.023      | 0           | 0         | 1         | 0         | 0          | 0          | 0         |
| 5636.808  | 1.183      | 0           | 0         | 0         | 0         | 0          | 1          | 0         |
| 1268.328  | -0.357     | 0           | 1         | 0         | 0         | 0          | 0          | 0         |
| 1536.27   | -0.86      | 1           | 0         | 0         | 0         | 0          | 0          | 0         |
| 1036.539  | -1.287     | 1           | 0         | 0         | 0         | 0          | 0          | 0         |
| 611.093   | -2.05      | 1           | 0         | 0         | 0         | 0          | 0          | 0         |
| 1914.573  | -1.413     | 1           | 0         | 0         | 0         | 0          | 0          | 0         |
|           | 0.86       | 0           | 0         | 0         | 1         | 0          | 0          | 1         |
| 3661.919  | -0.767     | 0           | 0         | 0         | 0         | 0          | 1          | 0         |
| 730.933   | -1.28      | 1           | 0         | 0         | 0         | 0          | 0          | 0         |
| 809.993   | 0.71       | 1           | 0         | 0         | 0         | 0          | 0          | 0         |

|          |        |   |   |   |   |   |   |   |
|----------|--------|---|---|---|---|---|---|---|
| 3955.164 | 0.637  | 0 | 0 | 0 | 0 | 1 | 0 | 0 |
| 2334.104 | -0.877 | 0 | 0 | 0 | 0 | 1 | 0 | 0 |
|          |        | 0 | 1 | 0 | 0 | 0 | 0 |   |
|          | 1.515  | 0 | 0 | 0 | 0 | 1 | 0 | 1 |
|          | 0.817  | 0 | 1 | 0 | 0 | 0 | 0 | 1 |
|          | 0.793  | 0 | 0 | 1 | 0 | 0 | 0 | 0 |
| 11932.71 | 1.71   | 0 | 0 | 1 | 0 | 0 | 0 | 0 |
| 1647.355 | -0.577 | 1 | 0 | 0 | 0 | 0 | 0 | 0 |
|          | 0.495  | 0 | 0 | 0 | 0 | 1 | 0 | 1 |
| 13991.6  | 1.837  | 0 | 0 | 1 | 0 | 0 | 0 | 0 |
| 1989.486 | -0.52  | 0 | 0 | 0 | 0 | 1 | 0 | 0 |
| 2389.185 | -1.153 | 1 | 0 | 0 | 0 | 0 | 0 | 0 |
| 3209.836 | -0.587 | 0 | 0 | 0 | 0 | 0 | 1 | 0 |
| 1711.68  | -0.03  | 1 | 0 | 0 | 0 | 0 | 0 | 0 |
|          | -0.307 | 1 | 0 | 0 | 0 | 0 | 0 | 0 |
|          |        | 1 | 0 | 0 | 0 | 0 | 0 |   |
| 7811.794 | 1.333  | 0 | 0 | 1 | 0 | 0 | 0 | 0 |
|          | 0.527  | 0 | 0 | 1 | 0 | 0 | 0 | 0 |
|          | -0.823 | 1 | 0 | 0 | 0 | 0 | 0 | 0 |
| 11059.54 | 1.897  | 0 | 0 | 1 | 0 | 0 | 0 | 0 |
|          | -0.093 | 0 | 0 | 0 | 1 | 0 | 0 | 1 |
|          |        | 0 | 0 | 0 | 0 | 0 | 1 |   |
| 12907.1  | 1.397  | 0 | 0 | 1 | 0 | 0 | 0 | 0 |
|          |        | 0 | 0 | 1 | 0 | 0 | 0 | 0 |
|          | -0.365 | 0 | 0 | 0 | 1 | 0 | 0 | 1 |
| 5359.929 | -0.553 | 1 | 0 | 0 | 0 | 0 | 0 | 0 |
| 12332.87 | 1.783  | 0 | 0 | 1 | 0 | 0 | 0 | 1 |
|          | -1.033 | 0 | 1 | 0 | 0 | 0 | 0 | 0 |
| 1217.556 | -0.297 | 1 | 0 | 0 | 0 | 0 | 0 | 1 |
|          |        | 0 | 0 | 1 | 0 | 0 | 0 |   |
| 469.724  | -1.32  | 1 | 0 | 0 | 0 | 0 | 0 | 0 |
|          |        | 0 | 0 | 0 | 0 | 1 | 0 | 0 |
| 866.362  | 0.1    | 1 | 0 | 0 | 0 | 0 | 0 | 1 |
| 707.146  | -1.65  | 1 | 0 | 0 | 0 | 0 | 0 | 0 |
| 1623.25  | -1.263 | 1 | 0 | 0 | 0 | 0 | 0 | 0 |
| 6959.675 | 0.81   | 0 | 0 | 1 | 0 | 0 | 0 | 0 |
|          | 0.27   | 0 | 0 | 0 | 0 | 1 | 0 | 1 |
|          |        | 0 | 0 | 0 | 0 | 1 | 0 | 0 |
| 3228.048 | -0.897 | 0 | 0 | 0 | 0 | 1 | 0 | 0 |
|          | 0.99   | 0 | 0 | 0 | 0 | 0 | 1 |   |
|          |        | 0 | 0 | 0 | 1 | 0 | 0 | 1 |
|          | -0.23  | 0 | 0 | 0 | 0 | 0 | 1 | 1 |
| 9882.841 | 1.037  | 0 | 1 | 0 | 0 | 0 | 0 | 1 |
| 1690.379 | -0.837 | 0 | 0 | 0 | 0 | 1 | 0 | 0 |
|          | -0.203 | 0 | 0 | 1 | 0 | 0 | 0 | 0 |
| 1007.399 | -1.463 | 0 | 0 | 0 | 0 | 1 | 0 | 0 |
| 5178.71  | 0.8    | 0 | 0 | 1 | 0 | 0 | 0 | 0 |
| 1752.64  | -0.653 | 0 | 1 | 0 | 0 | 0 | 0 | 0 |
| 1006.152 | 0.213  | 0 | 1 | 0 | 0 | 0 | 0 | 1 |
|          |        | 0 | 1 | 0 | 0 | 0 | 0 |   |

|          |        |   |   |   |   |   |   |   |
|----------|--------|---|---|---|---|---|---|---|
| 8281.263 | 1.643  | 0 | 0 | 1 | 0 | 0 | 0 | 1 |
| 3593.365 | -0.6   | 0 | 1 | 0 | 0 | 0 | 0 | 0 |
| 2984.537 | -1.507 | 0 | 1 | 0 | 0 | 0 | 0 | 0 |
|          | 1.753  | 0 | 0 | 1 | 0 | 0 | 0 | 0 |
| 9250.91  | 1.07   | 0 | 1 | 0 | 0 | 0 | 0 | 1 |
| 11048.93 | 0.893  | 0 | 0 | 1 | 0 | 0 | 0 | 0 |
| 3139.55  | -0.377 | 0 | 0 | 0 | 0 | 1 | 0 | 1 |
| 3248.945 | 0.39   | 0 | 1 | 0 | 0 | 0 | 0 | 0 |
| 11248.29 | 1.477  | 0 | 1 | 0 | 0 | 0 | 0 | 0 |
|          | -0.877 | 0 | 1 | 0 | 0 | 0 | 0 | 0 |
| 912.759  | -1.05  | 1 | 0 | 0 | 0 | 0 | 0 | 1 |
|          | -0.74  | 0 | 1 | 0 | 0 | 0 | 0 | 0 |
| 766.583  | -1.013 | 0 | 1 | 0 | 0 | 0 | 0 | 0 |
|          | -0.145 | 0 | 0 | 0 | 1 | 0 | 0 | 1 |
|          | 0.06   | 0 | 0 | 0 | 0 | 1 | 0 | 1 |
| 4725.635 | 0.717  | 0 | 1 | 0 | 0 | 0 | 0 | 0 |
| 19359.77 | 0.77   | 0 | 1 | 0 | 0 | 0 | 0 | 0 |
| 826.834  | -1.15  | 0 | 1 | 0 | 0 | 0 | 0 | 0 |
| 2881.809 | -0.177 | 0 | 1 | 0 | 0 | 0 | 0 | 0 |
| 1195.255 | -2.113 | 1 | 0 | 0 | 0 | 0 | 0 | 1 |
| 3978.577 | -1.01  | 1 | 0 | 0 | 0 | 0 | 0 | 0 |
|          | 0.06   | 0 | 0 | 0 | 0 | 1 | 0 | 1 |
|          | 1.515  | 0 | 0 | 1 | 0 | 0 | 0 | 0 |
| 1891.942 | -0.067 | 0 | 1 | 0 | 0 | 0 | 0 | 1 |
| 824.398  | -0.083 | 1 | 0 | 0 | 0 | 0 | 0 | 1 |
|          | 0.33   | 0 | 0 | 1 | 0 | 0 | 0 | 0 |
|          | 1.767  | 0 | 0 | 1 | 0 | 0 | 0 | 0 |
|          | 0.177  | 0 | 0 | 1 | 0 | 0 | 0 | 0 |
|          | 0.195  | 0 | 1 | 0 | 0 | 0 | 0 | 0 |
| 1952.039 | 0.133  | 1 | 0 | 0 | 0 | 0 | 0 | 0 |
|          |        | 0 | 0 | 1 | 0 | 0 | 0 | 0 |
|          | -0.317 | 0 | 0 | 1 | 0 | 0 | 0 | 0 |
| 966.595  | -0.653 | 1 | 0 | 0 | 0 | 0 | 0 | 0 |
|          | 0.35   | 0 | 1 | 0 | 0 | 0 | 0 | 1 |
| 4824.431 | -0.473 | 0 | 0 | 0 | 0 | 1 | 0 | 0 |
|          | -0.405 | 0 | 0 | 0 | 1 | 0 | 0 | 1 |
|          | -0.433 | 0 | 0 | 1 | 0 | 0 | 0 | 0 |
| 638.532  | -0.527 | 1 | 0 | 0 | 0 | 0 | 0 | 0 |
|          | 1.003  | 0 | 0 | 1 | 0 | 0 | 0 | 0 |
| 725.201  | -1.3   | 0 | 1 | 0 | 0 | 0 | 0 | 0 |
| 891.187  | 0      | 0 | 1 | 0 | 0 | 0 | 0 | 0 |
|          |        | 0 | 0 | 0 | 1 | 0 | 0 |   |
| 1278.82  | -0.85  | 1 | 0 | 0 | 0 | 0 | 0 | 0 |
| 856.331  | -0.523 | 1 | 0 | 0 | 0 | 0 | 0 | 0 |
|          |        | 0 | 0 | 0 | 0 | 1 | 0 |   |
|          | 1.255  | 0 | 0 | 0 | 0 | 1 | 0 | 0 |
| 4876.056 | 0.793  | 1 | 0 | 0 | 0 | 0 | 0 | 0 |
| 507.871  | -0.53  | 1 | 0 | 0 | 0 | 0 | 0 | 1 |
| 3467.013 | 0.517  | 0 | 1 | 0 | 0 | 0 | 0 | 1 |
|          |        | 1 | 0 | 0 | 0 | 0 | 0 | 0 |

|          |        |   |   |   |   |   |   |   |
|----------|--------|---|---|---|---|---|---|---|
| 3181.151 | 0.293  | 1 | 0 | 0 | 0 | 0 | 0 | 1 |
|          | -0.86  | 0 | 0 | 0 | 1 | 0 | 0 | 0 |
| 683.153  | -0.837 | 1 | 0 | 0 | 0 | 0 | 0 | 0 |
|          |        | 0 | 0 | 0 | 1 | 0 | 0 |   |
| 1109.575 | -1.29  | 1 | 0 | 0 | 0 | 0 | 0 | 1 |
| 2131.895 | -0.657 | 0 | 0 | 0 | 0 | 1 | 0 | 0 |
|          |        | 0 | 0 | 0 | 1 | 0 | 0 | 1 |
| 12961.17 | 1.79   | 0 | 0 | 1 | 0 | 0 | 0 | 0 |
| 13253.49 | 1.95   | 0 | 0 | 1 | 0 | 0 | 0 | 0 |
| 691.527  | -0.177 | 0 | 1 | 0 | 0 | 0 | 0 | 1 |
|          |        | 0 | 0 | 0 | 1 | 0 | 0 | 1 |
| 11982.21 | 1.87   | 0 | 0 | 0 | 1 | 0 | 0 | 1 |
| 3880.417 | 0.843  | 0 | 1 | 0 | 0 | 0 | 0 | 0 |
| 1110.924 | -0.727 | 0 | 1 | 0 | 0 | 0 | 0 | 1 |
| 3954.735 | -0.143 | 0 | 0 | 0 | 0 | 1 | 0 | 0 |
|          |        | 0 | 0 | 0 | 1 | 0 | 0 |   |
| 3502.972 | -0.633 | 0 | 0 | 0 | 0 | 0 | 1 | 0 |
| 1893.012 | -0.237 | 0 | 1 | 0 | 0 | 0 | 0 | 0 |
|          |        | 0 | 0 | 0 | 1 | 0 | 0 |   |
|          | -0.68  | 0 | 0 | 0 | 1 | 0 | 0 | 1 |
| 4706.412 | 0.643  | 0 | 0 | 1 | 0 | 0 | 0 | 0 |
| 7177.506 | 0.917  | 0 | 0 | 0 | 0 | 1 | 0 | 0 |
| 1933.106 | -0.977 | 0 | 1 | 0 | 0 | 0 | 0 | 0 |
| 6861.499 | 1.167  | 0 | 0 | 1 | 0 | 0 | 0 | 0 |
| 2405.144 | -0.817 | 0 | 0 | 0 | 0 | 0 | 1 | 0 |
| 2596.531 | -0.075 | 0 | 1 | 0 | 0 | 0 | 0 |   |
|          |        | 0 | 0 | 0 | 1 | 0 | 0 | 0 |
| 23511.4  | 0.433  | 0 | 1 | 0 | 0 | 0 | 0 | 0 |
| 3412.181 |        | 1 | 0 | 0 | 0 | 0 | 0 | 0 |
| 2935.706 | -0.15  | 0 | 0 | 1 | 0 | 0 | 0 | 0 |
|          | -0.873 | 0 | 0 | 1 | 0 | 0 | 0 | 0 |
| 739.706  | -1.4   | 1 | 0 | 0 | 0 | 0 | 0 | 0 |
| 7612.613 | 0.343  | 0 | 1 | 0 | 0 | 0 | 0 | 1 |
|          | -1.16  | 0 | 0 | 1 | 0 | 0 | 0 | 0 |
| 903.639  | -1.547 | 1 | 0 | 0 | 0 | 0 | 0 | 1 |
| 1348.293 | -0.207 | 1 | 0 | 0 | 0 | 0 | 0 | 0 |
| 8339.448 | 1.577  | 0 | 1 | 0 | 0 | 0 | 0 | 1 |
|          |        | 1 | 0 | 0 | 0 | 0 | 0 |   |
|          |        | 0 | 0 | 1 | 0 | 0 | 0 |   |
|          | -1.195 | 0 | 0 | 0 | 1 | 0 | 0 | 1 |
| 904.314  | -1.29  | 1 | 0 | 0 | 0 | 0 | 0 | 1 |
| 2147.779 | -0.743 | 0 | 0 | 0 | 0 | 1 | 0 | 0 |
|          |        | 0 | 0 | 1 | 0 | 0 | 0 | 0 |
| 1117.015 | -2.203 | 1 | 0 | 0 | 0 | 0 | 0 | 1 |
|          |        | 0 | 0 | 0 | 0 | 1 | 0 |   |
| 1255.841 | -0.205 | 1 | 0 | 0 | 0 | 0 | 0 | 0 |
|          | -0.323 | 0 | 0 | 0 | 0 | 0 | 1 | 0 |
|          | 0.263  | 0 | 0 | 1 | 0 | 0 | 0 | 0 |
|          | 0.973  | 0 | 0 | 1 | 0 | 0 | 0 | 0 |
| 13259.33 | 1.813  | 0 | 0 | 1 | 0 | 0 | 0 | 0 |



|                                                                                                 |        |   |   |   |   |   |   |   |
|-------------------------------------------------------------------------------------------------|--------|---|---|---|---|---|---|---|
| 1902.181                                                                                        | -0.16  | 1 | 0 | 0 | 0 | 0 | 0 | 1 |
| 3625.007                                                                                        | 0.58   | 1 | 0 | 0 | 0 | 0 | 0 | 0 |
| 4961.027                                                                                        | -0.367 | 0 | 1 | 0 | 0 | 0 | 0 | 0 |
|                                                                                                 |        | 0 | 0 | 0 | 0 | 1 | 0 |   |
| 472.883                                                                                         | -0.92  | 1 | 0 | 0 | 0 | 0 | 0 | 0 |
| 833.23                                                                                          | -0.893 | 1 | 0 | 0 | 0 | 0 | 0 | 0 |
| 2729.121                                                                                        | 0.477  | 0 | 1 | 0 | 0 | 0 | 0 | 1 |
|                                                                                                 | -1.61  | 0 | 1 | 0 | 0 | 0 | 0 | 0 |
|                                                                                                 |        | 0 | 0 | 0 | 1 | 0 | 0 | 1 |
|                                                                                                 | -1.18  | 0 | 1 | 0 | 0 | 0 | 0 | 0 |
|                                                                                                 |        | 0 | 1 | 0 | 0 | 0 | 0 |   |
|                                                                                                 | -0.38  | 0 | 0 | 0 | 1 | 0 | 0 | 1 |
| 8591.538                                                                                        | 0.42   | 0 | 0 | 0 | 0 | 1 | 0 | 1 |
| 2441.64                                                                                         | -0.083 | 1 | 0 | 0 | 0 | 0 | 0 | 0 |
| 3821.776                                                                                        | -0.04  | 0 | 1 | 0 | 0 | 0 | 0 | 0 |
|                                                                                                 | 1.69   | 0 | 0 | 0 | 1 | 0 | 0 | 1 |
| 5906.895                                                                                        | 0.867  | 0 | 1 | 0 | 0 | 0 | 0 | 0 |
| 527.04                                                                                          | -0.43  | 1 | 0 | 0 | 0 | 0 | 0 | 1 |
| 699.696                                                                                         | -0.7   | 1 | 0 | 0 | 0 | 0 | 0 | 1 |
|                                                                                                 | -0.823 | 0 | 0 | 1 | 0 | 0 | 0 | 0 |
|                                                                                                 |        | 0 | 1 | 0 | 0 | 0 | 0 |   |
| 5841.658                                                                                        | 0.55   | 0 | 0 | 0 | 0 | 0 | 1 | 0 |
| 17349.76                                                                                        | 1.697  | 0 | 0 | 0 | 0 | 1 | 0 | 1 |
|                                                                                                 | -1.023 | 0 | 1 | 0 | 0 | 0 | 0 | 0 |
|                                                                                                 |        | 0 | 0 | 1 | 0 | 0 | 0 |   |
|                                                                                                 | 0.06   | 0 | 0 | 0 | 0 | 1 | 0 | 1 |
| 9366.497                                                                                        | -0.73  | 0 | 0 | 0 | 0 | 0 | 1 | 0 |
|                                                                                                 |        | 0 | 0 | 0 | 0 | 1 | 0 |   |
|                                                                                                 |        | 0 | 0 | 0 | 0 | 1 | 0 | 1 |
| 932.382                                                                                         | -0.553 | 0 | 1 | 0 | 0 | 0 | 0 | 0 |
|                                                                                                 | -0.455 | 0 | 0 | 0 | 1 | 0 | 0 | 1 |
|                                                                                                 |        | 0 | 0 | 0 | 1 | 0 | 0 |   |
|                                                                                                 | 0.36   | 0 | 0 | 0 | 1 | 0 | 0 | 1 |
| 1703.219                                                                                        | -1.127 | 0 | 1 | 0 | 0 | 0 | 0 | 0 |
| 3667.399                                                                                        | 0.207  | 1 | 0 | 0 | 0 | 0 | 0 | 1 |
| 863.642                                                                                         | -0.587 | 1 | 0 | 0 | 0 | 0 | 0 | 1 |
| 1163.542                                                                                        | -0.813 | 1 | 0 | 0 | 0 | 0 | 0 | 1 |
| rgdppc_19 q_rule_law cont_africa cont_asia cont_euro cont_ocean cont_north cont_south legor_gbr |        |   |   |   |   |   |   |   |

ole and climatic data compiled by the Climate Research Unit of the University of East Anglia, Fischer, va





























micrometre scales.























| legor_fra | legor_soc | legor_deu | legor_sca | colony_es | colony_gb | colony_fra | colony_prt | colony_oe |
|-----------|-----------|-----------|-----------|-----------|-----------|------------|------------|-----------|
| 1         | 0         | 0         | 0         | 0         | 0         | 0          | 0          | 0         |
| 1         | 0         | 0         | 0         | 0         | 0         | 0          | 0          | 0         |
| 1         | 0         | 0         | 0         | 0         | 0         | 0          | 1          | 0         |
|           |           |           |           | 0         | 0         | 0          | 0          | 0         |
| 0         | 1         | 0         | 0         | 0         | 0         | 0          | 0          | 0         |
| 1         | 0         | 0         | 0         | 0         | 0         | 0          | 0          | 0         |
| 1         | 0         | 0         | 0         | 0         | 0         | 0          | 0          | 0         |
| 0         | 0         | 0         | 0         | 0         | 1         | 0          | 0          | 0         |
| 1         | 0         | 0         | 0         | 1         | 0         | 0          | 0          | 0         |
| 0         | 1         | 0         | 0         | 0         | 0         | 0          | 0          | 0         |
| 0         | 0         | 0         | 0         | 0         | 0         | 0          | 0          | 0         |
| 0         | 0         | 0         | 0         | 0         | 1         | 0          | 0          | 0         |
| 0         | 0         | 0         | 0         | 0         | 1         | 0          | 0          | 0         |
| 0         | 0         | 1         | 0         | 0         | 0         | 0          | 0          | 0         |
| 0         | 1         | 0         | 0         | 0         | 0         | 0          | 0          | 0         |
| 1         | 0         | 0         | 0         | 0         | 0         | 0          | 0          | 1         |
| 1         | 0         | 0         | 0         | 0         | 0         | 0          | 0          | 0         |
| 1         | 0         | 0         | 0         | 0         | 0         | 1          | 0          | 0         |
| 1         | 0         | 0         | 0         | 0         | 0         | 1          | 0          | 0         |
| 0         | 0         | 0         | 0         | 0         | 1         | 0          | 0          | 0         |
| 0         | 1         | 0         | 0         | 0         | 0         | 0          | 0          | 0         |
| 0         | 0         | 0         | 0         | 0         | 1         | 0          | 0          | 0         |
| 0         | 0         | 0         | 0         | 0         | 1         | 0          | 0          | 0         |
| 0         | 1         | 0         | 0         | 0         | 0         | 0          | 0          | 0         |
| 0         | 1         | 0         | 0         | 0         | 0         | 0          | 0          | 0         |
| 0         | 0         | 0         | 0         | 0         | 1         | 0          | 0          | 0         |
| 0         | 0         | 0         | 0         | 0         | 0         | 0          | 0          | 0         |
| 1         | 0         | 0         | 0         | 1         | 0         | 0          | 0          | 0         |
| 1         | 0         | 0         | 0         | 0         | 0         | 0          | 1          | 0         |
| 0         | 0         | 0         | 0         | 0         | 1         | 0          | 0          | 0         |
| 0         | 0         | 0         | 0         | 0         | 1         | 0          | 0          | 0         |
| 0         | 0         | 0         | 0         | 0         | 1         | 0          | 0          | 0         |
| 0         | 0         | 0         | 0         | 0         | 1         | 0          | 0          | 0         |
| 1         | 0         | 0         | 0         | 0         | 0         | 1          | 0          | 0         |
| 0         | 0         | 0         | 0         | 0         | 1         | 0          | 0          | 0         |
|           |           |           |           | 0         | 0         | 0          | 0          | 0         |
| 0         | 0         | 1         | 0         | 0         | 0         | 0          | 0          | 0         |
| 1         | 0         | 0         | 0         | 1         | 0         | 0          | 0          | 0         |
| 0         | 1         | 0         | 0         | 0         | 0         | 0          | 0          | 0         |
| 1         | 0         | 0         | 0         | 0         | 0         | 1          | 0          | 0         |
| 1         | 0         | 0         | 0         | 0         | 0         | 1          | 0          | 0         |
| 1         | 0         | 0         | 0         | 0         | 0         | 0          | 0          | 1         |
| 1         | 0         | 0         | 0         | 0         | 0         | 1          | 0          | 0         |
| 0         | 0         | 0         | 0         | 0         | 0         | 0          | 0          | 0         |
| 1         | 0         | 0         | 0         | 1         | 0         | 0          | 0          | 0         |
| 1         | 0         | 0         | 0         | 0         | 0         | 1          | 0          | 0         |
| 1         | 0         | 0         | 0         | 0         | 0         | 0          | 1          | 0         |

|   |   |   |   |   |   |   |   |   |
|---|---|---|---|---|---|---|---|---|
| 1 | 0 | 0 | 0 | 1 | 0 | 0 | 0 | 0 |
| 0 | 1 | 0 | 0 | 1 | 0 | 0 | 0 | 0 |
|   |   |   |   | 0 | 0 | 0 | 0 | 0 |
| 0 | 0 | 0 | 0 | 0 | 0 | 0 | 0 | 0 |
| 0 | 0 | 0 | 0 | 0 | 1 | 0 | 0 | 0 |
| 0 | 1 | 0 | 0 | 0 | 0 | 0 | 0 | 0 |
| 0 | 0 | 1 | 0 | 0 | 0 | 0 | 0 | 0 |
| 1 | 0 | 0 | 0 | 0 | 0 | 1 | 0 | 0 |
| 0 | 0 | 0 | 0 | 0 | 1 | 0 | 0 | 0 |
| 0 | 0 | 0 | 1 | 0 | 0 | 0 | 0 | 0 |
| 1 | 0 | 0 | 0 | 1 | 0 | 0 | 0 | 0 |
| 1 | 0 | 0 | 0 | 0 | 0 | 1 | 0 | 0 |
| 1 | 0 | 0 | 0 | 1 | 0 | 0 | 0 | 0 |
| 1 | 0 | 0 | 0 | 0 | 1 | 0 | 0 | 0 |
| 1 | 0 | 0 | 0 | 0 | 1 | 0 | 0 | 0 |
|   |   |   |   | 0 | 0 | 0 | 0 | 0 |
| 1 | 0 | 0 | 0 | 0 | 0 | 0 | 0 | 0 |
| 0 | 1 | 0 | 0 | 0 | 0 | 0 | 0 | 0 |
| 1 | 0 | 0 | 0 | 0 | 0 | 0 | 0 | 0 |
| 0 | 0 | 0 | 1 | 0 | 0 | 0 | 0 | 0 |
| 0 | 0 | 0 | 0 | 0 | 1 | 0 | 0 | 0 |
|   |   |   |   | 0 | 0 | 0 | 0 | 0 |
| 1 | 0 | 0 | 0 | 0 | 0 | 0 | 0 | 0 |
| 1 | 0 | 0 | 0 | 0 | 0 | 0 | 0 | 0 |
| 0 | 0 | 0 | 0 | 0 | 0 | 0 | 0 | 0 |
| 1 | 0 | 0 | 0 | 0 | 0 | 1 | 0 | 0 |
| 0 | 0 | 0 | 0 | 0 | 0 | 0 | 0 | 0 |
| 0 | 1 | 0 | 0 | 0 | 0 | 0 | 0 | 0 |
| 0 | 0 | 0 | 0 | 0 | 1 | 0 | 0 | 0 |
|   |   |   |   | 0 | 0 | 0 | 0 | 0 |
| 1 | 0 | 0 | 0 | 0 | 0 | 1 | 0 | 0 |
| 1 | 0 | 0 | 0 | 0 | 0 | 0 | 0 | 0 |
| 0 | 0 | 0 | 0 | 0 | 1 | 0 | 0 | 0 |
| 1 | 0 | 0 | 0 | 0 | 0 | 0 | 1 | 0 |
| 1 | 0 | 0 | 0 | 1 | 0 | 0 | 0 | 0 |
| 1 | 0 | 0 | 0 | 0 | 0 | 0 | 0 | 0 |
| 0 | 0 | 0 | 0 | 0 | 1 | 0 | 0 | 0 |
| 1 | 0 | 0 | 0 | 0 | 0 | 0 | 0 | 0 |
| 1 | 0 | 0 | 0 | 1 | 0 | 0 | 0 | 0 |
|   |   |   |   | 0 | 0 | 0 | 0 | 0 |
| 0 | 0 | 0 | 0 | 0 | 0 | 0 | 0 | 0 |
| 0 | 0 | 0 | 0 | 0 | 1 | 0 | 0 | 0 |
| 0 | 0 | 0 | 0 | 0 | 1 | 0 | 0 | 0 |
| 1 | 0 | 0 | 0 | 1 | 0 | 0 | 0 | 0 |
| 0 | 1 | 0 | 0 | 0 | 0 | 0 | 0 | 0 |
| 1 | 0 | 0 | 0 | 0 | 0 | 1 | 0 | 0 |
| 0 | 1 | 0 | 0 | 0 | 0 | 0 | 0 | 0 |
| 1 | 0 | 0 | 0 | 0 | 0 | 0 | 0 | 1 |
| 0 | 0 | 0 | 0 | 0 | 1 | 0 | 0 | 0 |
|   |   |   |   | 0 | 0 | 0 | 0 | 0 |

|   |   |   |   |   |   |   |   |   |
|---|---|---|---|---|---|---|---|---|
| 0 | 0 | 0 | 0 | 0 | 0 | 0 | 0 | 0 |
| 1 | 0 | 0 | 0 | 0 | 0 | 0 | 0 | 0 |
| 1 | 0 | 0 | 0 | 0 | 1 | 0 | 0 | 0 |
| 0 | 0 | 0 | 1 | 0 | 0 | 0 | 0 | 0 |
| 0 | 0 | 0 | 0 | 0 | 1 | 0 | 0 | 0 |
| 1 | 0 | 0 | 0 | 0 | 0 | 0 | 0 | 0 |
| 0 | 0 | 0 | 0 | 0 | 1 | 0 | 0 | 0 |
| 1 | 0 | 0 | 0 | 0 | 1 | 0 | 0 | 0 |
| 0 | 0 | 1 | 0 | 0 | 0 | 0 | 0 | 0 |
| 0 | 1 | 0 | 0 | 0 | 0 | 0 | 0 | 0 |
| 0 | 0 | 0 | 0 | 0 | 1 | 0 | 0 | 0 |
| 0 | 1 | 0 | 0 | 0 | 0 | 0 | 0 | 0 |
| 0 | 1 | 0 | 0 | 0 | 0 | 1 | 0 | 0 |
| 0 | 0 | 0 | 0 | 0 | 1 | 0 | 0 | 0 |
| 0 | 0 | 0 | 0 | 0 | 1 | 0 | 0 | 0 |
| 0 | 0 | 1 | 0 | 0 | 0 | 0 | 0 | 0 |
| 1 | 0 | 0 | 0 | 0 | 1 | 0 | 0 | 0 |
| 0 | 1 | 0 | 0 | 0 | 0 | 1 | 0 | 0 |
| 1 | 0 | 0 | 0 | 0 | 0 | 1 | 0 | 0 |
| 0 | 0 | 0 | 0 | 0 | 0 | 0 | 0 | 0 |
| 1 | 0 | 0 | 0 | 0 | 0 | 0 | 0 | 1 |
| 0 | 0 | 0 | 0 | 0 | 1 | 0 | 0 | 0 |
| 0 | 0 | 1 | 0 | 0 | 0 | 0 | 0 | 0 |
| 0 | 0 | 0 | 0 | 0 | 1 | 0 | 0 | 0 |
| 0 | 0 | 0 | 0 | 0 | 1 | 0 | 0 | 0 |
| 0 | 1 | 0 | 0 | 0 | 0 | 0 | 0 | 0 |
| 1 | 0 | 0 | 0 | 0 | 0 | 0 | 0 | 0 |
| 0 | 1 | 0 | 0 | 0 | 0 | 0 | 0 | 0 |
| 1 | 0 | 0 | 0 | 0 | 0 | 0 | 0 | 0 |
| 1 | 0 | 0 | 0 | 0 | 0 | 1 | 0 | 0 |
| 1 | 0 | 0 | 0 | 0 | 0 | 0 | 0 | 0 |
| 0 | 1 | 0 | 0 | 0 | 0 | 0 | 0 | 0 |
| 1 | 0 | 0 | 0 | 0 | 0 | 1 | 0 | 0 |
| 0 | 0 | 0 | 0 | 0 | 1 | 0 | 0 | 0 |
| 1 | 0 | 0 | 0 | 1 | 0 | 0 | 0 | 0 |
| 0 | 0 | 0 | 0 | 0 | 0 | 0 | 0 | 0 |
| 0 | 1 | 0 | 0 | 0 | 0 | 0 | 0 | 0 |
| 1 | 0 | 0 | 0 | 0 | 0 | 0 | 0 | 0 |
| 1 | 0 | 0 | 0 | 0 | 0 | 1 | 0 | 0 |
| 1 | 0 | 0 | 0 | 0 | 0 | 0 | 0 | 0 |
| 0 | 1 | 0 | 0 | 0 | 1 | 0 | 0 | 0 |
| 0 | 1 | 0 | 0 | 0 | 0 | 0 | 0 | 0 |
|   |   |   |   | 0 | 0 | 0 | 0 | 0 |
| 1 | 0 | 0 | 0 | 0 | 0 | 0 | 1 | 0 |
| 1 | 0 | 0 | 0 | 0 | 0 | 1 | 0 | 0 |
|   |   |   |   | 0 | 0 | 0 | 0 | 0 |
| 1 | 0 | 0 | 0 | 0 | 0 | 0 | 0 | 0 |
| 1 | 0 | 0 | 0 | 0 | 1 | 0 | 0 | 0 |
| 0 | 0 | 0 | 0 | 0 | 1 | 0 | 0 | 0 |
| 0 | 0 | 0 | 0 | 0 | 1 | 0 | 0 | 0 |
| 1 | 0 | 0 | 0 | 0 | 0 | 0 | 0 | 0 |

|   |   |   |   |   |   |   |   |   |
|---|---|---|---|---|---|---|---|---|
| 0 | 0 | 0 | 0 | 0 | 1 | 0 | 0 | 0 |
| 1 | 0 | 0 | 0 | 0 | 0 | 1 | 0 | 0 |
| 1 | 0 | 0 | 0 | 0 | 0 | 1 | 0 | 0 |
|   |   |   |   | 0 | 0 | 0 | 0 | 0 |
| 0 | 0 | 0 | 0 | 0 | 1 | 0 | 0 | 0 |
| 1 | 0 | 0 | 0 | 1 | 0 | 0 | 0 | 0 |
| 0 | 0 | 0 | 0 | 0 | 0 | 0 | 0 | 0 |
| 1 | 0 | 0 | 0 | 0 | 0 | 0 | 0 | 0 |
| 0 | 0 | 0 | 1 | 0 | 0 | 0 | 0 | 0 |
| 0 | 0 | 0 | 0 | 0 | 0 | 0 | 0 | 0 |
| 0 | 0 | 0 | 0 | 0 | 1 | 0 | 0 | 0 |
| 0 | 0 | 0 | 0 | 0 | 1 | 0 | 0 | 0 |
| 1 | 0 | 0 | 0 | 0 | 1 | 0 | 0 | 0 |
| 0 | 0 | 0 | 0 | 0 | 1 | 0 | 0 | 0 |
| 1 | 0 | 0 | 0 | 1 | 0 | 0 | 0 | 0 |
|   |   |   |   | 0 | 0 | 0 | 0 | 0 |
| 1 | 0 | 0 | 0 | 1 | 0 | 0 | 0 | 0 |
| 1 | 0 | 0 | 0 | 1 | 0 | 0 | 0 | 0 |
|   |   |   |   | 0 | 0 | 0 | 0 | 0 |
| 0 | 0 | 0 | 0 | 0 | 1 | 0 | 0 | 0 |
| 0 | 1 | 0 | 0 | 0 | 0 | 0 | 0 | 0 |
| 1 | 0 | 0 | 0 | 1 | 0 | 0 | 0 | 0 |
| 0 | 1 | 0 | 0 | 0 | 0 | 0 | 0 | 0 |
| 1 | 0 | 0 | 0 | 0 | 0 | 0 | 0 | 0 |
| 1 | 0 | 0 | 0 | 1 | 0 | 0 | 0 | 0 |
|   |   |   |   | 0 | 0 | 0 | 0 | 0 |
| 1 | 0 | 0 | 0 | 0 | 0 | 1 | 0 | 0 |
| 1 | 0 | 0 | 0 | 0 | 1 | 0 | 0 | 0 |
| 1 | 0 | 0 | 0 | 0 | 0 | 0 | 0 | 0 |
| 0 | 1 | 0 | 0 | 0 | 0 | 0 | 0 | 0 |
| 0 | 1 | 0 | 0 | 0 | 0 | 0 | 0 | 0 |
| 1 | 0 | 0 | 0 | 0 | 0 | 0 | 0 | 1 |
| 0 | 0 | 0 | 0 | 0 | 0 | 0 | 0 | 0 |
| 0 | 1 | 0 | 0 | 0 | 0 | 0 | 0 | 0 |
| 0 | 0 | 0 | 0 | 0 | 1 | 0 | 0 | 0 |
| 1 | 0 | 0 | 0 | 0 | 0 | 1 | 0 | 0 |
| 0 | 0 | 0 | 0 | 0 | 1 | 0 | 0 | 0 |
|   |   |   |   | 0 | 0 | 0 | 0 | 0 |
|   |   |   |   | 0 | 0 | 0 | 0 | 0 |
| 0 | 0 | 0 | 0 | 0 | 1 | 0 | 0 | 0 |
| 0 | 0 | 0 | 0 | 0 | 1 | 0 | 0 | 0 |
| 1 | 0 | 0 | 0 | 1 | 0 | 0 | 0 | 0 |
| 1 | 0 | 0 | 0 | 0 | 0 | 0 | 0 | 0 |
| 0 | 0 | 0 | 0 | 0 | 0 | 0 | 0 | 1 |
|   |   |   |   | 0 | 0 | 0 | 0 | 0 |
| 1 | 0 | 0 | 0 | 0 | 0 | 0 | 1 | 0 |
| 1 | 0 | 0 | 0 | 0 | 0 | 0 | 0 | 1 |
| 0 | 1 | 0 | 0 | 0 | 0 | 0 | 0 | 0 |
| 0 | 1 | 0 | 0 | 0 | 0 | 0 | 0 | 0 |
| 0 | 0 | 0 | 1 | 0 | 0 | 0 | 0 | 0 |

|   |   |   |   |   |   |   |   |   |
|---|---|---|---|---|---|---|---|---|
| 0 | 0 | 0 | 0 | 0 | 1 | 0 | 0 | 0 |
| 1 | 0 | 0 | 0 | 0 | 1 | 0 | 0 | 0 |
| 1 | 0 | 0 | 0 | 0 | 0 | 1 | 0 | 0 |
|   |   |   |   | 0 | 0 | 0 | 0 | 0 |
| 1 | 0 | 0 | 0 | 0 | 0 | 1 | 0 | 0 |
| 1 | 0 | 0 | 0 | 0 | 0 | 1 | 0 | 0 |
| 0 | 0 | 0 | 0 | 0 | 0 | 0 | 0 | 0 |
| 0 | 1 | 0 | 0 | 0 | 0 | 0 | 0 | 0 |
| 0 | 0 | 0 | 0 | 0 | 0 | 0 | 0 | 0 |
| 0 | 1 | 0 | 0 | 0 | 0 | 0 | 0 | 0 |
|   |   |   |   | 0 | 0 | 0 | 0 | 0 |
| 0 | 0 | 0 | 0 | 0 | 1 | 0 | 0 | 0 |
| 0 | 0 | 0 | 0 | 0 | 1 | 0 | 0 | 0 |
| 1 | 0 | 0 | 0 | 0 | 0 | 1 | 0 | 0 |
| 1 | 0 | 0 | 0 | 0 | 0 | 0 | 0 | 0 |
| 0 | 0 | 0 | 0 | 0 | 1 | 0 | 0 | 0 |
| 0 | 0 | 1 | 0 | 0 | 0 | 0 | 0 | 0 |
| 0 | 0 | 0 | 0 | 0 | 1 | 0 | 0 | 0 |
| 0 | 0 | 0 | 0 | 0 | 1 | 0 | 0 | 0 |
| 0 | 1 | 0 | 0 | 0 | 0 | 0 | 0 | 0 |
|   |   |   |   | 0 | 0 | 0 | 0 | 0 |
| 1 | 0 | 0 | 0 | 1 | 0 | 0 | 0 | 0 |
| 0 | 0 | 0 | 0 | 0 | 1 | 0 | 0 | 0 |
| 0 | 1 | 0 | 0 | 0 | 0 | 0 | 0 | 0 |
|   |   |   |   | 0 | 0 | 0 | 0 | 0 |
| 0 | 0 | 0 | 0 | 0 | 1 | 0 | 0 | 0 |
| 1 | 0 | 0 | 0 | 1 | 0 | 0 | 0 | 0 |
|   |   |   |   | 0 | 0 | 0 | 0 | 0 |
| 0 | 0 | 0 | 0 | 0 | 0 | 0 | 0 | 0 |
| 0 | 1 | 0 | 0 | 0 | 0 | 1 | 0 | 0 |
| 0 | 0 | 0 | 0 | 0 | 1 | 0 | 0 | 0 |
|   |   |   |   | 0 | 0 | 0 | 0 | 0 |
| 0 | 0 | 0 | 0 | 0 | 1 | 0 | 0 | 0 |
| 1 | 0 | 0 | 0 | 0 | 1 | 0 | 0 | 0 |
| 0 | 0 | 0 | 0 | 0 | 1 | 0 | 0 | 0 |
| 0 | 0 | 0 | 0 | 0 | 1 | 0 | 0 | 0 |
| 0 | 0 | 0 | 0 | 0 | 1 | 0 | 0 | 0 |

legor\_fra legor\_soc legor\_deu legor\_sca colony\_es colony\_gb colony\_fra colony\_prt colony\_oer

in Velthuisen, Shah, and Nachtergaele (2002) identify whether each cell on a 5-minute grid covering all





















































| africa_regi | africa_regi | africa_regi | africa_regi | africa_regi | slave_expc | dist_slaver | dist_slaver | dist_slaver |
|-------------|-------------|-------------|-------------|-------------|------------|-------------|-------------|-------------|
| 0           | 0           | 0           | 0           | 0           | 0          |             |             |             |
| 0           | 0           | 0           | 0           | 0           | 0          |             |             |             |
| 0           | 0           | 0           | 0           | 1           | 3.61E+06   | 5.669       | 6.981       | 4.926       |
| 0           | 0           | 0           | 0           | 0           | 0          |             |             |             |
| 0           | 0           | 0           | 0           | 0           | 0          |             |             |             |
| 0           | 0           | 0           | 0           | 0           | 0          |             |             |             |
| 0           | 0           | 0           | 0           | 0           | 0          |             |             |             |
| 0           | 0           | 0           | 0           | 0           | 0          |             |             |             |
| 0           | 0           | 0           | 0           | 0           | 0          |             |             |             |
| 0           | 0           | 0           | 0           | 0           | 0          |             |             |             |
| 0           | 0           | 0           | 0           | 0           | 0          |             |             |             |
| 0           | 0           | 0           | 0           | 0           | 0          |             |             |             |
| 0           | 0           | 0           | 0           | 0           | 0          |             |             |             |
| 0           | 0           | 0           | 0           | 0           | 0          |             |             |             |
| 0           | 0           | 0           | 0           | 0           | 0          |             |             |             |
| 0           | 0           | 0           | 1           | 0           | 86.997     | 10.626      | 2.57        | 3.719       |
| 0           | 0           | 0           | 0           | 0           | 0          |             |             |             |
| 0           | 0           | 1           | 0           | 0           | 4.57E+05   | 5.121       | 9.234       | 2.835       |
| 0           | 0           | 1           | 0           | 0           | 1.67E+05   | 4.775       | 9.299       | 2.764       |
| 0           | 0           | 0           | 0           | 0           | 0          |             |             |             |
| 0           | 0           | 0           | 0           | 0           | 0          |             |             |             |
| 0           | 0           | 0           | 0           | 0           | 0          |             |             |             |
| 0           | 0           | 0           | 0           | 0           | 0          |             |             |             |
| 0           | 0           | 0           | 0           | 0           | 0          |             |             |             |
| 0           | 0           | 0           | 0           | 0           | 0          |             |             |             |
| 0           | 0           | 0           | 0           | 0           | 0          |             |             |             |
| 0           | 0           | 0           | 0           | 0           | 0          |             |             |             |
| 0           | 0           | 0           | 0           | 0           | 0          |             |             |             |
| 0           | 0           | 0           | 0           | 0           | 0          |             |             |             |
| 0           | 0           | 0           | 0           | 0           | 0          |             |             |             |
| 0           | 0           | 0           | 0           | 0           | 0          |             |             |             |
| 0           | 0           | 0           | 0           | 0           | 0          |             |             |             |
| 0           | 0           | 0           | 0           | 0           | 0          |             |             |             |
| 0           | 1           | 0           | 0           | 0           | 0          | 5.686       | 5.765       | 5.857       |
| 0           | 0           | 0           | 0           | 1           | 2009.941   | 5.642       | 8.772       | 2.84        |
| 0           | 0           | 0           | 0           | 0           | 0          |             |             |             |
| 0           | 0           | 0           | 0           | 0           | 0          |             |             |             |
| 0           | 0           | 0           | 0           | 0           | 0          |             |             |             |
| 0           | 0           | 0           | 0           | 0           | 0          |             |             |             |
| 0           | 0           | 0           | 0           | 0           | 0          |             |             |             |
| 0           | 0           | 1           | 0           | 0           | 52645.95   | 4.186       | 9.457       | 3.353       |
| 0           | 0           | 0           | 0           | 1           | 66718.81   | 5.642       | 8.772       | 3.003       |
| 0           | 0           | 0           | 0           | 1           | 7.67E+05   | 5.712       | 7.643       | 3.748       |
| 0           | 0           | 0           | 0           | 1           | 94662.92   | 5.527       | 7.924       | 3.697       |
| 0           | 0           | 0           | 0           | 0           | 0          |             |             |             |
| 0           | 0           | 0           | 0           | 0           | 0          |             |             |             |
| 0           | 0           | 0           | 1           | 0           | 0          | 10.131      | 1.754       | 4.846       |
| 0           | 0           | 1           | 0           | 0           | 0          | 3.647       | 11.6        | 3.482       |

[illegible]

|   |   |   |   |   |          |        |        |       |
|---|---|---|---|---|----------|--------|--------|-------|
| 0 | 0 | 0 | 0 | 0 | 0        |        |        |       |
| 0 | 0 | 0 | 0 | 0 | 0        |        |        |       |
| 0 | 0 | 0 | 0 | 0 | 0        |        |        |       |
| 0 | 0 | 0 | 0 | 0 | 0        |        |        |       |
| 0 | 0 | 0 | 0 | 0 | 0        |        |        |       |
| 0 | 0 | 0 | 0 | 0 | 0        |        |        |       |
| 0 | 0 | 0 | 0 | 0 | 0        |        |        |       |
| 0 | 0 | 0 | 0 | 0 | 0        |        |        |       |
| 0 | 0 | 0 | 0 | 0 | 0        |        |        |       |
| 0 | 0 | 0 | 0 | 0 | 0        |        |        |       |
| 0 | 0 | 0 | 0 | 0 | 0        |        |        |       |
| 0 | 0 | 0 | 1 | 0 | 86447.91 | 11.083 | 2.705  | 3.359 |
| 0 | 0 | 0 | 0 | 0 | 0        |        |        |       |
| 0 | 0 | 0 | 0 | 0 | 0        |        |        |       |
| 0 | 0 | 0 | 0 | 0 | 0        |        |        |       |
| 0 | 0 | 0 | 0 | 0 | 0        |        |        |       |
| 0 | 0 | 0 | 0 | 0 | 0        |        |        |       |
| 0 | 0 | 0 | 0 | 0 | 0        |        |        |       |
| 0 | 0 | 0 | 0 | 0 | 0        |        |        |       |
| 0 | 0 | 0 | 0 | 0 | 0        |        |        |       |
| 0 | 0 | 1 | 0 | 0 | 6789.634 | 3.776  | 9.777  | 3.595 |
| 1 | 0 | 0 | 0 | 0 | 8847.93  | 8.422  | 16.775 | 0.61  |
| 0 | 0 | 0 | 0 | 0 | 0        |        |        |       |
| 0 | 0 | 0 | 0 | 0 | 0        |        |        |       |
| 0 | 0 | 0 | 0 | 0 | 0        |        |        |       |
| 0 | 1 | 0 | 0 | 0 | 0        | 7.202  | 3.035  | 6.637 |
| 0 | 0 | 0 | 0 | 0 | 0        |        |        |       |
| 0 | 0 | 0 | 0 | 0 | 0        |        |        |       |
| 0 | 0 | 0 | 0 | 0 | 0        |        |        |       |
| 0 | 0 | 0 | 0 | 0 | 0        |        |        |       |
| 1 | 0 | 0 | 0 | 0 | 0        | 5.794  | 13.676 | 1.023 |
| 0 | 0 | 0 | 0 | 0 | 0        |        |        |       |
| 0 | 0 | 0 | 0 | 0 | 0        |        |        |       |
| 0 | 0 | 0 | 1 | 0 | 1.25E+05 | 9.686  | 0.904  | 5.732 |
| 0 | 0 | 0 | 0 | 0 | 0        |        |        |       |
| 0 | 0 | 0 | 0 | 0 | 0        |        |        |       |
| 0 | 0 | 0 | 0 | 0 | 0        |        |        |       |
| 0 | 0 | 0 | 0 | 0 | 0        |        |        |       |
| 0 | 0 | 1 | 0 | 0 | 8.42E+05 | 3.897  | 10.79  | 2.263 |
| 0 | 0 | 0 | 0 | 0 | 0        |        |        |       |
| 0 | 0 | 0 | 0 | 0 | 0        |        |        |       |
| 0 | 0 | 0 | 0 | 0 | 0        |        |        |       |
| 0 | 0 | 0 | 0 | 0 | 0        |        |        |       |
| 0 | 1 | 0 | 0 | 0 | 6.26E+05 | 9.264  | 2.185  | 5.268 |
| 0 | 0 | 1 | 0 | 0 | 1.64E+05 | 4.424  | 11.914 | 2.255 |
| 0 | 0 | 0 | 0 | 0 | 0        |        |        |       |
| 0 | 0 | 0 | 0 | 0 | 0        |        |        |       |
| 0 | 0 | 0 | 1 | 0 | 0        | 10.31  | 0.032  | 6.274 |
| 0 | 1 | 0 | 0 | 0 | 1.25E+05 | 9.267  | 2.183  | 4.821 |
| 0 | 0 | 0 | 0 | 0 | 0        |        |        |       |
| 0 | 0 | 0 | 1 | 0 | 0        | 10.108 | 1.551  | 4.995 |

[illegible]



|   |   |   |   |   |          |        |        |       |
|---|---|---|---|---|----------|--------|--------|-------|
| 0 | 1 | 0 | 0 | 0 | 0        | 8.291  | 2.622  | 6.295 |
| 0 | 0 | 0 | 1 | 0 | 0        | 11.457 | 1.742  | 4.635 |
| 0 | 0 | 0 | 0 | 0 | 0        |        |        |       |
| 0 | 0 | 0 | 0 | 0 | 0        |        |        |       |
| 0 | 0 | 0 | 0 | 1 | 5.29E+05 | 5.581  | 8.876  | 1.879 |
| 0 | 0 | 1 | 0 | 0 | 2.90E+05 | 4.926  | 9.258  | 3.009 |
| 0 | 0 | 0 | 0 | 0 | 0        |        |        |       |
| 0 | 0 | 0 | 0 | 0 | 0        |        |        |       |
| 0 | 0 | 0 | 0 | 0 | 0        |        |        |       |
| 0 | 0 | 0 | 0 | 0 | 0        |        |        |       |
| 0 | 0 | 0 | 0 | 0 | 0        |        |        |       |
| 0 | 0 | 0 | 0 | 0 | 0        |        |        |       |
| 0 | 0 | 0 | 0 | 0 | 0        |        |        |       |
| 0 | 0 | 0 | 0 | 0 | 0        |        |        |       |
| 1 | 0 | 0 | 0 | 0 | 0        | 7.48   | 15.833 | 0.31  |
| 0 | 0 | 0 | 0 | 0 | 0        |        |        |       |
| 0 | 0 | 0 | 0 | 0 | 0        |        |        |       |
| 0 | 0 | 0 | 0 | 0 | 0        |        |        |       |
| 0 | 0 | 0 | 1 | 0 | 5.35E+05 | 10.595 | 2.558  | 4.056 |
| 0 | 0 | 0 | 1 | 0 | 4553.603 | 10.996 | 2.699  | 3.204 |
| 0 | 0 | 0 | 0 | 0 | 0        |        |        |       |
| 0 | 0 | 0 | 0 | 0 | 0        |        |        |       |
| 0 | 0 | 0 | 0 | 0 | 0        |        |        |       |
| 0 | 0 | 0 | 0 | 0 | 0        |        |        |       |
| 0 | 0 | 0 | 0 | 0 | 0        |        |        |       |
| 0 | 0 | 0 | 0 | 0 | 0        |        |        |       |
| 0 | 0 | 0 | 0 | 0 | 0        |        |        |       |
| 0 | 0 | 0 | 0 | 0 | 0        |        |        |       |
| 0 | 0 | 0 | 0 | 0 | 0        |        |        |       |
| 0 | 0 | 0 | 0 | 0 | 0        |        |        |       |
| 0 | 0 | 0 | 0 | 0 | 0        |        |        |       |
| 0 | 0 | 0 | 0 | 0 | 0        |        |        |       |
| 0 | 0 | 0 | 0 | 0 | 0        |        |        |       |
| 0 | 0 | 0 | 0 | 0 | 0        |        |        |       |
| 0 | 0 | 0 | 0 | 0 | 0        |        |        |       |
| 0 | 0 | 0 | 0 | 0 | 0        |        |        |       |
| 0 | 1 | 0 | 0 | 0 | 2030.663 | 6.766  | 3.457  | 6.584 |
| 0 | 1 | 0 | 0 | 0 | 27957.1  | 9.027  | 2.389  | 4.849 |
| 0 | 1 | 0 | 0 | 0 | 1088.177 | 9.027  | 2.389  | 5.454 |

africa\_regi africa\_regi africa\_regi africa\_regi africa\_regi slave\_expc dist\_slaver dist\_slaver dist\_slaver

most the entire land area of the Earth is subject to various constraints for growing rainfed crops. Based o





















































| dist_slaver | pop_1400 | european_descent |
|-------------|----------|------------------|
|-------------|----------|------------------|

|       |          |        |
|-------|----------|--------|
|       | 614      |        |
|       | 1870829  | 0      |
| 3.872 | 1223208  | 2      |
|       | 200000   | 100    |
|       | 1802     |        |
|       | 19200    | 0      |
|       | 276632   | 89.889 |
|       | 105743   | 0.5    |
|       | 747      |        |
|       | 200000   | 89.954 |
|       | 1250000  | 98.4   |
|       | 226250   | 4      |
| 2.215 | 239693   | 0      |
|       | 773466   | 98     |
| 3.902 | 348867   | 0      |
| 4.239 | 692976   | 0      |
|       | 9103705  | 0      |
|       | 894427   | 98.85  |
|       | 31897    | 0      |
|       | 1276     |        |
|       | 366341   | 100    |
|       | 487364   | 100    |
|       | 5326     | 39.91  |
|       | 601      |        |
|       | 829897   | 26.732 |
|       | 931150   | 74.43  |
|       | 3403     |        |
|       | 2328     |        |
|       | 36082    | 0      |
| 4.3   | 80312    | 1.5    |
| 2.293 | 387580   | 0.6    |
|       | 174110   | 85.33  |
|       | 600000   | 98.5   |
|       | 553265   | 59.19  |
|       | 80943756 | 0      |
| 4.794 | 435857   | 0      |
| 3.051 | 1317285  | 0      |
| 2.687 | 3593277  | 0.46   |
| 3.227 | 238219   | 0      |
|       | 902880   | 45.6   |
| 2.61  | 0        | 0      |
| 6.465 | 0        | 41.4   |

|       |          |        |
|-------|----------|--------|
|       | 74647    | 60.39  |
|       | 95479    | 63     |
|       | 150000   | 1      |
|       | 1801067  | 100    |
|       | 6500000  | 97.6   |
| 0.064 | 34822    |        |
|       | 824      |        |
|       | 600000   | 99.2   |
|       | 39145    | 52     |
| 3.654 | 1588836  | 0      |
|       | 553265   | 31.976 |
| 1.113 | 4182558  | 0      |
| 0.07  | 101512   | 1.9    |
| 5.215 | 2439     |        |
|       | 5500000  | 99.24  |
|       | 69282    | 100    |
| 0.51  | 1639589  | 0      |
|       | 100000   | 100    |
|       | 139322   | 2.2    |
|       | 11000000 | 93.4   |
|       | 10000    |        |
|       | 15427    |        |
| 3.529 | 138320   | 1      |
|       | 3306643  | 94.6   |
|       | 275547   | 3      |
| 4.332 | 912300   | 0      |
| 5.259 | 455699   | 0      |
|       | 3387     |        |
| 5.638 | 51104    | 0.5    |
| 5.633 | 87833    | 3      |
| 3.515 | 66516    | 5.75   |
|       | 1118034  | 100    |
|       | 1237     |        |
|       | 10000    |        |
|       | 243109   | 21.965 |
|       |          | 1.3    |
|       | 42611    | 0      |
|       | 114924   | 46     |
|       | 530014   | 99.55  |
|       | 51954    | 2.5    |
|       | 1000000  | 99.3   |
|       | 6987225  | 0      |
|       | 77226807 | 0      |

|       |          |        |
|-------|----------|--------|
|       | 193357   | 99.885 |
|       | 3741657  | 0      |
|       | 1000000  | 0      |
|       | 60000    |        |
|       | 229955   | 30.698 |
|       | 7000000  | 99.8   |
|       | 22626    | 8      |
|       | 86370    | 1      |
|       | 12500000 | 0      |
|       | 1253389  | 41.9   |
| 1.361 | 1322790  | 0      |
|       | 325361   | 15     |
|       | 1383162  | 0      |
|       | 10513    |        |
|       | 743      |        |
|       | 2308243  | 0      |
|       | 42006    | 0      |
|       | 348220   | 0      |
|       | 313584   | 0.5    |
| 5.227 | 143361   | 0      |
| 2.151 | 500000   | 0      |
|       | 1335     |        |
|       | 956352   | 0      |
| 4.846 | 26096    | 0      |
|       | 161557   | 100    |
|       | 26534    | 99.2   |
|       | 122643   | 100    |
|       | 13636    |        |
| 4.571 | 1586397  | 8      |
|       | 147311   | 99.1   |
| 3.454 | 544859   | 0.6    |
|       | 4514402  | 30     |
|       | 6267     |        |
|       | 169275   | 96.31  |
| 4.311 | 1063541  | 0      |
|       | 10000    | 99.5   |
|       | 3482202  | 0      |
|       | 578516   | 1      |
| 3.298 | 786003   | 0      |
| 4.973 | 221211   | 0      |
|       | 218      |        |
|       | 3580     |        |
| 3.884 | 0        | 16     |
| 2.922 | 348220   | 0      |
|       | 296322   | 0      |
| 2.722 | 0        |        |

|       |         |        |
|-------|---------|--------|
| 4.685 | 93798   | 10.85  |
|       | 31251   |        |
| 2.954 | 705385  | 0      |
| 3.314 | 5909180 | 0      |
|       | 100069  | 51     |
|       | 600000  | 95.95  |
|       | 400000  | 100    |
|       | 1852093 | 0      |
|       | 15000   | 80.6   |
|       | 200000  | 0      |
|       | 7669487 | 0      |
|       | 66462   | 45.2   |
|       | 1888175 | 28.043 |
|       | 362390  | 0      |
|       | 866855  | 0      |
|       | 2750000 | 100    |
|       | 35772   | 66.3   |
|       | 1191757 | 0      |
|       | 900000  | 98.27  |
|       | 174110  | 52.85  |
|       | 183675  |        |
|       | 24449   |        |
|       | 6897    | 0.9    |
| 3.879 | 0       |        |
|       | 1250000 | 99.43  |
|       | 6481410 | 99.5   |
| 2.102 | 211005  | 0      |
|       | 2000000 | 0      |
|       | 981591  | 98.68  |
| 0.983 | 3776350 | 0      |
| 5.518 | 442565  | 1.3    |
|       | 49570   | 0.5    |
| 6.07  | 0       |        |
|       | 43289   |        |
| 5.41  | 338261  | 0      |
|       | 150732  | 50     |
| 0.695 | 661618  | 0      |
| 3.932 | 0       |        |
|       | 698933  | 99.61  |
|       | 202779  | 100    |
|       | 800000  | 99.3   |

|       |         |       |
|-------|---------|-------|
| 4.423 | 9707    | 2.8   |
| 2.253 | 0       |       |
|       | 1306601 | 0     |
| 2.026 | 776187  | 0     |
| 4.085 | 231251  | 0     |
|       | 1741101 | 0     |
|       | 286375  | 3.9   |
|       | 226444  | 5.5   |
|       | 36325   | 0     |
|       | 19021   |       |
|       | 10258   | 7.1   |
| 3.205 | 836512  | 0     |
|       | 6438306 | 10    |
|       | 174110  | 0     |
| 2.187 | 1496403 | 0     |
| 1.65  | 1322790 | 0     |
|       | 2347003 | 100   |
|       |         | 91.89 |
|       | 783496  | 76.02 |
|       | 1180650 | 7.5   |
|       | 1081    |       |
|       | 377635  | 54.5  |
|       | 120     |       |
|       | 432     |       |
|       | 1665106 | 0     |
|       | 22994   |       |
|       | 33072   |       |
|       | 2250000 | 0     |
| 4.895 | 486527  | 18    |
| 3.253 | 348220  | 1     |
| 3.696 | 174110  | 1     |

dist\_slaver pop\_1400 european\_descent

on plates 20 (soil moisture storage capacity constraints), 21 (soil depth constraints), 22 (soil fertility coi





















































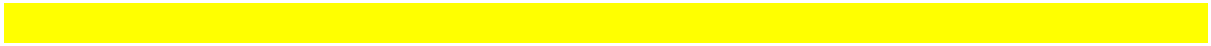









straints), 23 (soil drainage constraints), 24 (soil texture constraints), and 25 (soil chemical constraints





























































) in Fischer *et al.* (2002) and the country boundaries described above, we calculate the percentage of tl































































he land surface area of each country that has fertile soil (defined as soil that is not subject to severe cons





























































straints for growing rainfed crops in terms of either soil fertility, depth, chemical and drainage properties































































as, or moisture storage capacity). Cape Verde, French Polynesia, Mauritius and Seychelles are not cover





























































ed by the Fischer *et al.* (2002) data, so for these countries we use instead the percentage of their land su































































surface area that is classified by the Food and Agriculture Organization (2008) as arable land or permanent





















































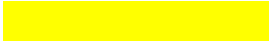







ent crop land.
